# Supplementary material for: Integrative Analyses of Genes Associated with Subcutaneous Insulin Resistance
Source: PubMed Central journal article supplement (PMC6406848; doi:10.3390/biom9020037), 2019-01-22
Supplement: biomolecules-09-00037-s001.pdf [file biomolecules-09-00037-s001.pdf]

**Table S1** The statistical metrics for key differentially expressed genes (DEGs)

| Illumina Id  | Gene Symbol | logFC    | pValue   | FDR      | tvalue   | Regulation | Gene Name                                                                                                                           |
|--------------|-------------|----------|----------|----------|----------|------------|-------------------------------------------------------------------------------------------------------------------------------------|
| ILMN_2165993 | ITLN1       | 8.684117 | 1.07E-18 | 5.04E-14 | 95.96989 | Up         | "Homo sapiens intelectin 1 (galactofuranose binding) (ITLN1), mRNA."                                                                |
| ILMN_2353161 | MSLN        | 8.140032 | 4.91E-13 | 9.75E-09 | 32.24662 | Up         | "Homo sapiens mesothelin (MSLN), transcript variant 2, mRNA."                                                                       |
| ILMN_1728570 | TCF21       | 3.385002 | 5.64E-12 | 5.33E-08 | 26.24676 | Up         | "Homo sapiens transcription factor 21 (TCF21), transcript variant 1, mRNA."                                                         |
| ILMN_1763390 | ISL1        | 5.296494 | 3.41E-11 | 2.01E-07 | 22.53207 | Up         | "Homo sapiens ISL1 transcription factor, LIM/homeodomain, (islet-1) (ISL1), mRNA."                                                  |
| ILMN_2118129 | ITLN2       | 5.871462 | 6.25E-11 | 2.96E-07 | 21.39665 | Up         | "Homo sapiens intelectin 2 (ITLN2), mRNA."                                                                                          |
| ILMN_1695924 | KLK11       | 6.628375 | 8.21E-11 | 3.53E-07 | 20.90392 | Up         | "Homo sapiens kallikrein-related peptidase 11 (KLK11), transcript variant 2, mRNA."                                                 |
| ILMN_1746801 | CGN         | 6.052765 | 1.72E-10 | 5.44E-07 | 19.61811 | Up         | "Homo sapiens cingulin (CGN), mRNA."                                                                                                |
| ILMN_1800317 | WNT5A       | 2.625075 | 2.01E-10 | 5.95E-07 | 19.36083 | Up         | "Homo sapiens wingless-type MMTV integration site family, member 5A (WNT5A), mRNA."                                                 |
| ILMN_1730777 | KRT19       | 6.461745 | 8.39E-10 | 2.34E-06 | 17.1213  | Up         | "Homo sapiens keratin 19 (KRT19), mRNA."                                                                                            |
| ILMN_1786197 | NR2F1       | 3.751858 | 1E-09    | 2.64E-06 | 16.86022 | Up         | "Homo sapiens nuclear receptor subfamily 2, group F, member 1 (NR2F1), mRNA."                                                       |
| ILMN_2041222 | KRT18P55    | 4.531194 | 1.15E-09 | 2.87E-06 | 16.65888 | Up         | "Homo sapiens keratin 18 pseudogene 55,mRNA."                                                                                       |
| ILMN_1778087 | ANXA8       | 6.689182 | 1.54E-09 | 3.63E-06 | 16.24877 | Up         | "Homo sapiens annexin A8 (ANXA8), mRNA."                                                                                            |
| ILMN_1798557 | LOC202134   | 4.206992 | 2.11E-09 | 4.76E-06 | 15.80531 | Up         | "PREDICTED: Homo sapiens hypothetical protein LOC202134, transcript variant 1 (LOC202134), mRNA."                                   |
| ILMN_1723910 | WIT-1       | 3.207408 | 2.3E-09  | 4.94E-06 | 15.68871 | Up         | "Homo sapiens Wilms tumor associated protein (WIT-1), mRNA."                                                                        |
| ILMN_1705685 | MEIS1       | 2.346418 | 3.61E-09 | 7.18E-06 | 15.08337 | Up         | "Homo sapiens Meis homeobox 1 (MEIS1), mRNA."                                                                                       |
| ILMN_1766712 | TCF21       | 2.654083 | 3.64E-09 | 7.18E-06 | 15.07183 | Up         | "Homo sapiens transcription factor 21 (TCF21), transcript variant 2, mRNA."                                                         |
| ILMN_3237981 | ATPGD1      | 4.593669 | 4.04E-09 | 7.34E-06 | 14.93425 | Up         | "Homo sapiens ATP-grasp domain containing 1 (ATPGD1), transcript variant 2, mRNA."                                                  |
| ILMN_1805665 | FLRT3       | 4.658149 | 4.06E-09 | 7.34E-06 | 14.92991 | Up         | "Homo sapiens fibronectin leucine rich transmembrane protein 3 (FLRT3), transcript variant 2, mRNA."                                |
| ILMN_1697733 | CST6        | 3.402206 | 4.47E-09 | 7.55E-06 | 14.80516 | Up         | "PREDICTED: Homo sapiens cystatin E/M (CST6), mRNA."                                                                                |
| ILMN_3280842 | KRT8P45     | 2.197599 | 4.63E-09 | 7.55E-06 | 14.75973 | Up         | "Homo sapiens ATP-grasp domain containing 1 (ATPGD1), transcript variant 2, mRNA."                                                  |
| ILMN_3237912 | WIT1        | 3.43109  | 5.17E-09 | 8.15E-06 | 14.61739 | Up         | "Homo sapiens Wilms tumor upstream neighbor 1 (WIT1), non-coding RNA."                                                              |
| ILMN_1665425 | RPRM        | 4.458764 | 6.15E-09 | 9.26E-06 | 14.39638 | Up         | "Homo sapiens reprimo, TP53 dependent G2 arrest mediator candidate (RPRM), mRNA."                                                   |
| ILMN_1694778 | LOC646723   | 4.448603 | 6.26E-09 | 9.26E-06 | 14.37382 | Up         | "PREDICTED: Homo sapiens similar to Keratin, type I cytoskeletal 18 (Cytokeratin-18) (CK-18) (Keratin-18) (K18) (LOC646723), mRNA." |
| ILMN_1724686 | CLDN1       | 6.172477 | 6.85E-09 | 9.79E-06 | 14.26007 | Up         | "Homo sapiens claudin 1 (CLDN1), mRNA."                                                                                             |
| ILMN_1671600 | EPS8L1      | 2.588304 | 7.03E-09 | 9.79E-06 | 14.2273  | Up         | "Homo sapiens EPS8-like 1 (EPS8L1), transcript variant 1, mRNA."                                                                    |
| ILMN_1743620 | RARRES1     | 4.091466 | 8.01E-09 | 1.08E-05 | 14.0659  | Up         | "Homo sapiens retinoic acid receptor responder (tazarotene induced) 1 (RARRES1), transcript variant 2, mRNA."                       |
| ILMN_1725746 | ATPGD1      | 4.048623 | 8.65E-09 | 1.14E-05 | 13.97123 | Up         | "Homo sapiens ATP-grasp domain containing 1 (ATPGD1), transcript variant 2, mRNA."                                                  |
| ILMN_1772627 | D4S234E     | 4.7017   | 9.63E-09 | 1.16E-05 | 13.83922 | Up         | "Homo sapiens DNA segment on chromosome 4 (unique) 234 expressed sequence (D4S234E), transcript variant 2, mRNA."                   |
| ILMN_1745570 | KLK7        | 4.262127 | 9.86E-09 | 1.16E-05 | 13.81075 | Up         | "Homo sapiens kallikrein-related peptidase 7 (KLK7), transcript variant 1, mRNA."                                                   |
| ILMN_1811437 | C11ORF9     | 2.59692  | 1.01E-08 | 1.16E-05 | 13.78681 | Up         | "Homo sapiens chromosome 11 open reading frame 9 (C11orf9), transcript variant 1, mRNA."                                            |
| ILMN_2189371 | NTNG1       | 4.08723  | 1.19E-08 | 1.34E-05 | 13.58432 | Up         | "Homo sapiens netrin G1 (NTNG1), transcript variant 3, mRNA."                                                                       |
| ILMN_1800091 | RARRES1     | 4.210778 | 1.32E-08 | 1.46E-05 | 13.4576  | Up         | "Homo sapiens retinoic acid receptor responder (tazarotene induced) 1 (RARRES1), transcript variant 1, mRNA."                       |

|              |           |          |          |          |          |    |                                                                                                                               |
|--------------|-----------|----------|----------|----------|----------|----|-------------------------------------------------------------------------------------------------------------------------------|
| ILMN_1768705 | SYT4      | 4.099696 | 1.54E-08 | 1.62E-05 | 13.27659 | Up | "Homo sapiens synaptotagmin IV (SYT4), mRNA."                                                                                 |
| ILMN_1803211 | FBXO2     | 2.608996 | 1.96E-08 | 1.98E-05 | 12.99529 | Up | "Homo sapiens F-box protein 2 (FBXO2), mRNA."                                                                                 |
| ILMN_1727778 | NTNG1     | 3.498184 | 2.09E-08 | 2.02E-05 | 12.92034 | Up | "Homo sapiens netrin G1 (NTNG1), transcript variant 3, mRNA."                                                                 |
| ILMN_1671971 | LOC644743 | 4.164172 | 2.21E-08 | 2.09E-05 | 12.85847 | Up | "PREDICTED: Homo sapiens hypothetical LOC644743 (LOC644743), mRNA."                                                           |
| ILMN_2125346 | MUC16     | 4.40295  | 2.29E-08 | 2.12E-05 | 12.82082 | Up | "Homo sapiens mucin 16, cell surface associated (MUC16), mRNA."                                                               |
| ILMN_1653687 | GALNT9    | 4.067043 | 2.47E-08 | 2.25E-05 | 12.73292 | Up | "Homo sapiens UDP-N-acetyl-alpha-D-galactosamine:polypeptide N-acetylgalactosaminyltransferase 9 (GalNAc-T9) (GALNT9), mRNA." |
| ILMN_3263974 | KRT18P13  | 3.75781  | 2.75E-08 | 2.45E-05 | 12.61337 | Up | "PREDICTED: Homo sapiens keratin 18 pseudogene 13 (KRT18P13), mRNA."                                                          |
| ILMN_1764885 | C20ORF75  | 4.580189 | 3.18E-08 | 2.75E-05 | 12.45071 | Up | "Homo sapiens chromosome 20 open reading frame 75 (C20orf75), mRNA."                                                          |
| ILMN_1751465 | BNC1      | 5.02406  | 3.19E-08 | 2.75E-05 | 12.44511 | Up | "Homo sapiens basoonin 1 (BNC1), mRNA."                                                                                       |
| ILMN_1802174 | WT1       | 4.438531 | 3.25E-08 | 2.75E-05 | 12.42452 | Up | "Homo sapiens Wilms tumor 1 (WT1), transcript variant D, mRNA."                                                               |
| ILMN_3236160 | C4ORF49   | 4.589    | 3.51E-08 | 2.92E-05 | 12.3389  | Up | "Homo sapiens chromosome 4 open reading frame 49 (C4orf49), mRNA."                                                            |
| ILMN_1799098 | LOC652846 | 5.740792 | 4.58E-08 | 3.67E-05 | 12.04923 | Up | "PREDICTED: Homo sapiens similar to Annexin A8 (Annexin VIII) (Vascular anticoagulant-beta) (VAC-beta) (LOC652846), mRNA."    |
| ILMN_2409642 | TRO       | 1.582639 | 4.75E-08 | 3.74E-05 | 12.01108 | Up | "Homo sapiens trophinin (TRO), transcript variant 6, mRNA."                                                                   |
| ILMN_1707464 | MST1      | 2.606618 | 5.25E-08 | 4.07E-05 | 11.90379 | Up | "Homo sapiens macrophage stimulating 1 (hepatocyte growth factor-like) (MST1), mRNA."                                         |
| ILMN_1683939 | VIPR2     | 3.511691 | 5.72E-08 | 4.3E-05  | 11.81124 | Up | "Homo sapiens vasoactive intestinal peptide receptor 2 (VIPR2), mRNA."                                                        |
| ILMN_1806667 | FRAS1     | 4.386564 | 5.92E-08 | 4.38E-05 | 11.77493 | Up | "Homo sapiens Fraser syndrome 1 (FRAS1), mRNA."                                                                               |
| ILMN_2353054 | KLK5      | 4.148017 | 6.8E-08  | 4.8E-05  | 11.62914 | Up | "Homo sapiens kallikrein-related peptidase 5 (KLK5), transcript variant 1, mRNA."                                             |
| ILMN_2298301 | BNC1      | 4.474755 | 7.28E-08 | 4.97E-05 | 11.55859 | Up | "Homo sapiens basoonin 1 (BNC1), mRNA."                                                                                       |
| ILMN_1676042 | ALOX15    | 5.54937  | 7.35E-08 | 4.97E-05 | 11.5474  | Up | "PREDICTED: Homo sapiens arachidonate 15-lipoxygenase (ALOX15), mRNA."                                                        |
| ILMN_2176592 | BCHE      | 4.329322 | 7.59E-08 | 5.06E-05 | 11.5147  | Up | "Homo sapiens butyrylcholinesterase (BCHE), mRNA."                                                                            |
| ILMN_1661628 | LOC653110 | 4.073945 | 7.81E-08 | 5.13E-05 | 11.48473 | Up | "PREDICTED: Homo sapiens similar to annexin A8, transcript variant 1 (LOC653110), mRNA."                                      |
| ILMN_1694426 | ROR2      | 3.107025 | 8.29E-08 | 5.38E-05 | 11.42266 | Up | "Homo sapiens receptor tyrosine kinase-like orphan receptor 2 (ROR2), mRNA."                                                  |
| ILMN_2181892 | BEX2      | 3.438705 | 9.35E-08 | 5.97E-05 | 11.29942 | Up | "Homo sapiens brain expressed X-linked 2 (BEX2), mRNA."                                                                       |
| ILMN_1685641 | BCHE      | 4.212703 | 9.46E-08 | 5.97E-05 | 11.28776 | Up | "Homo sapiens butyrylcholinesterase (BCHE), mRNA."                                                                            |
| ILMN_3272378 | EZR       | 2.140432 | 9.75E-08 | 6.07E-05 | 11.25682 | Up | "Homo sapiens ezrin (EZR), transcript variant 1, mRNA."                                                                       |
| ILMN_1682937 | RSPO1     | 4.013119 | 1.01E-07 | 6.18E-05 | 11.21985 | Up | "Homo sapiens R-spondin homolog (Xenopus laevis) (RSPO1), mRNA."                                                              |
| ILMN_1811364 | SGPP2     | 3.741849 | 1.02E-07 | 6.18E-05 | 11.21146 | Up | "PREDICTED: Homo sapiens sphingosine-1-phosphate phosphatase 2 (SGPP2), mRNA."                                                |
| ILMN_1793025 | OSAP      | 4.181253 | 1.03E-07 | 6.19E-05 | 11.19683 | Up | "Homo sapiens ovary-specific acidic protein (OSAP), mRNA."                                                                    |
| ILMN_1753584 | KRT8      | 3.555651 | 1.15E-07 | 6.82E-05 | 11.08744 | Up | "Homo sapiens keratin 8 (KRT8), mRNA."                                                                                        |
| ILMN_2285404 | DMKN      | 3.075001 | 1.29E-07 | 7.53E-05 | 10.97468 | Up | "Homo sapiens dermokine (DMKN), transcript variant 2, mRNA."                                                                  |
| ILMN_3277209 | LOC285943 | 1.426717 | 1.44E-07 | 8.28E-05 | 10.86649 | Up | "PREDICTED: Homo sapiens hypothetical protein LOC285943 (LOC285943), miscRNA."                                                |
| ILMN_1693941 | IGSF9     | 2.414908 | 1.46E-07 | 8.28E-05 | 10.84897 | Up | "Homo sapiens immunoglobulin superfamily, member 9 (IGSF9), mRNA."                                                            |
| ILMN_2052373 | RAB17     | 2.70869  | 1.47E-07 | 8.28E-05 | 10.84536 | Up | "Homo sapiens RAB17, member RAS oncogene family (RAB17), mRNA."                                                               |
| ILMN_1796423 | CLIC3     | 3.628715 | 1.49E-07 | 8.31E-05 | 10.83001 | Up | "Homo sapiens chloride intracellular channel 3 (CLIC3), mRNA."                                                                |
| ILMN_1687848 | C7        | 3.407321 | 1.59E-07 | 8.76E-05 | 10.76669 | Up | "Homo sapiens complement component 7 (C7), mRNA."                                                                             |

|              |           |          |          |          |          |    |                                                                                                                                                           |
|--------------|-----------|----------|----------|----------|----------|----|-----------------------------------------------------------------------------------------------------------------------------------------------------------|
| ILMN_2366967 | WT1       | 4.232364 | 1.63E-07 | 8.86E-05 | 10.74367 | Up | "Homo sapiens Wilms tumor 1 (WT1), transcript variant A, mRNA."                                                                                           |
| ILMN_2065773 | SCG5      | 3.318088 | 2E-07    | 0.000107 | 10.54235 | Up | "Homo sapiens secretogranin V (7B2 protein) (SCG5), mRNA."                                                                                                |
| ILMN_1765363 | DSC3      | 3.494685 | 2.01E-07 | 0.000107 | 10.53932 | Up | "Homo sapiens desmocollin 3 (DSC3), transcript variant Dsc3b, mRNA."                                                                                      |
| ILMN_1698666 | CST6      | 3.7017   | 2.38E-07 | 0.000121 | 10.37708 | Up | "Homo sapiens cystatin E/M (CST6), mRNA."                                                                                                                 |
| ILMN_1765310 | TCEAL2    | 4.132552 | 2.38E-07 | 0.000121 | 10.3763  | Up | "Homo sapiens transcription elongation factor A (SII)-like 2 (TCEAL2), mRNA."                                                                             |
| ILMN_1796925 | CXADR     | 4.998577 | 2.5E-07  | 0.000124 | 10.33152 | Up | "Homo sapiens coxsackie virus and adenovirus receptor (CXADR), mRNA."                                                                                     |
| ILMN_1723678 | PRPH      | 2.599298 | 2.51E-07 | 0.000124 | 10.32648 | Up | "Homo sapiens peripherin (PRPH), mRNA."                                                                                                                   |
| ILMN_1725417 | NELL2     | 3.522566 | 2.63E-07 | 0.000128 | 10.28203 | Up | "Homo sapiens NEL-like 2 (chicken) (NELL2), mRNA."                                                                                                        |
| ILMN_1795937 | VIL2      | 2.388371 | 2.67E-07 | 0.000129 | 10.26731 | Up | "Homo sapiens villin 2 (ezrin) (VIL2), mRNA."                                                                                                             |
| ILMN_1715476 | LOC649970 | 2.985285 | 2.71E-07 | 0.00013  | 10.25338 | Up | "PREDICTED: Homo sapiens similar to creatine kinase, mitochondrial 1B precursor (LOC649970), mRNA."                                                       |
| ILMN_1721770 | PAPPA     | 1.86056  | 2.83E-07 | 0.000134 | 10.21329 | Up | "Homo sapiens pregnancy-associated plasma protein A, pappalysin 1 (PAPPA), mRNA."                                                                         |
| ILMN_1814369 | C21ORF62  | 3.500926 | 3.44E-07 | 0.000161 | 10.0315  | Up | "Homo sapiens chromosome 21 open reading frame 62 (C21orf62), mRNA."                                                                                      |
| ILMN_1782004 | BAPX1     | 3.604661 | 3.49E-07 | 0.000162 | 10.01738 | Up | "Homo sapiens bagpipe homeobox homolog 1 (Drosophila) (BAPX1), mRNA."                                                                                     |
| ILMN_1754570 | KCTD8     | 2.541146 | 3.85E-07 | 0.000175 | 9.928107 | Up | "Homo sapiens potassium channel tetramerisation domain containing 8 (KCTD8), mRNA."                                                                       |
| ILMN_1748538 | ALDH1A2   | 2.888869 | 4E-07    | 0.00018  | 9.891117 | Up | "Homo sapiens aldehyde dehydrogenase 1 family, member A2 (ALDH1A2), transcript variant 3, mRNA."                                                          |
| ILMN_1803956 | BOC       | 1.295234 | 4.53E-07 | 0.000201 | 9.778172 | Up | "Homo sapiens Boc homolog (mouse) (BOC), mRNA."                                                                                                           |
| ILMN_1887267 | HS.177532 | 2.256587 | 4.55E-07 | 0.000201 | 9.774308 | Up | "BX355045 Homo sapiens NEUROBLASTOMA COT 25-NORMALIZED Homo sapiens cDNA clone CS0DC029YI23 5-PRIME, mRNA sequence"                                       |
| ILMN_2072101 | C4ORF49   | 4.480501 | 5.99E-07 | 0.000253 | 9.527038 | Up | "Homo sapiens chromosome 4 open reading frame 49 (C4orf49), mRNA."                                                                                        |
| ILMN_2114720 | SLPI      | 5.020655 | 6.1E-07  | 0.000254 | 9.511623 | Up | "Homo sapiens secretory leukocyte peptidase inhibitor (SLPI), mRNA."                                                                                      |
| ILMN_1658709 | LAMB1     | 1.517162 | 6.13E-07 | 0.000254 | 9.507156 | Up | "Homo sapiens laminin, beta 1 (LAMB1), mRNA."                                                                                                             |
| ILMN_2095610 | ANXA8     | 4.77946  | 6.3E-07  | 0.000259 | 9.481614 | Up | "Homo sapiens annexin A8 (ANXA8), mRNA.<br>XM_931361 XM_931369 XM_931374 XM_931375 XM_931378 XM_931383 XM_931388 XM_931391 XM_931399 XM_931404 XM_931411" |
| ILMN_1670490 | PDPN      | 3.810324 | 6.47E-07 | 0.00026  | 9.458303 | Up | "Homo sapiens podoplanin (PDPN), transcript variant 4, mRNA."                                                                                             |
| ILMN_2413779 | SEZ6L2    | 2.564288 | 6.69E-07 | 0.000264 | 9.428613 | Up | "Homo sapiens seizure related 6 homolog (mouse)-like 2 (SEZ6L2), transcript variant 2, mRNA."                                                             |
| ILMN_1717793 | C19ORF33  | 4.115413 | 6.72E-07 | 0.000264 | 9.424962 | Up | "Homo sapiens chromosome 19 open reading frame 33 (C19orf33), mRNA."                                                                                      |
| ILMN_1784294 | CPA4      | 4.097719 | 6.78E-07 | 0.000264 | 9.417577 | Up | "Homo sapiens carboxypeptidase A4 (CPA4), mRNA."                                                                                                          |
| ILMN_1758731 | CYP2J2    | 3.024802 | 6.82E-07 | 0.000264 | 9.412432 | Up | "Homo sapiens cytochrome P450, family 2, subfamily J, polypeptide 2 (CYP2J2), mRNA."                                                                      |
| ILMN_1743219 | CA11      | 3.035765 | 6.91E-07 | 0.000266 | 9.400387 | Up | "Homo sapiens carbonic anhydrase XI (CA11), mRNA."                                                                                                        |
| ILMN_2295518 | TRO       | 1.407565 | 7.9E-07  | 0.0003   | 9.282908 | Up | "Homo sapiens trophinin (TRO), transcript variant 6, mRNA."                                                                                               |
| ILMN_1910085 | HS.536734 | 3.367488 | 7.92E-07 | 0.0003   | 9.280907 | Up | "ab76b04.s1 Stratagene fetal retina 937202 Homo sapiens cDNA clone IMAGE:852847 3, mRNA sequence"                                                         |
| ILMN_1805765 | CMYA5     | 2.289902 | 8.01E-07 | 0.000301 | 9.271455 | Up | "Homo sapiens cardiomyopathy associated 5 (CMYA5), mRNA."                                                                                                 |
| ILMN_1670145 | DFNA5     | 1.988839 | 8.29E-07 | 0.000309 | 9.241389 | Up | "Homo sapiens deafness, autosomal dominant 5 (DFNA5), transcript variant 1, mRNA."                                                                        |
| ILMN_1781149 | INMT      | 2.049627 | 8.96E-07 | 0.000327 | 9.174389 | Up | "Homo sapiens indolethylamine N-methyltransferase (INMT), mRNA."                                                                                          |
| ILMN_1813753 | PTN       | 1.729449 | 9.02E-07 | 0.000327 | 9.168334 | Up | "Homo sapiens pleiotrophin (PTN), mRNA."                                                                                                                  |
| ILMN_1783443 | ALOX15    | 3.929072 | 9.05E-07 | 0.000327 | 9.165716 | Up | "PREDICTED: Homo sapiens arachidonate 15-lipoxygenase (ALOX15), mRNA."                                                                                    |

|              |           |          |          |          |          |    |                                                                                                                                                                                          |
|--------------|-----------|----------|----------|----------|----------|----|------------------------------------------------------------------------------------------------------------------------------------------------------------------------------------------|
| ILMN_1733983 | LOC653316 | 3.03306  | 9.51E-07 | 0.00034  | 9.122609 | Up | "PREDICTED: Homo sapiens similar to NY-REN-7 antigen, transcript variant 4 (LOC653316), mRNA."                                                                                           |
| ILMN_2186983 | ANXA8L2   | 4.372934 | 9.56E-07 | 0.00034  | 9.118264 | Up | "Homo sapiens annexin A8-like 2 (ANXA8L2), mRNA."                                                                                                                                        |
| ILMN_1739325 | LOC284023 | 1.833939 | 9.71E-07 | 0.000343 | 9.104609 | Up | "PREDICTED: Homo sapiens hypothetical protein LOC284023, transcript variant 3 (LOC284023), mRNA."<br>"Homo sapiens mucin 1, cell surface associated (MUC1), transcript variant 6, mRNA." |
| ILMN_1756992 | MUC1      | 2.020251 | 9.88E-07 | 0.000346 | 9.090056 | Up |                                                                                                                                                                                          |
| ILMN_1727815 | CFI       | 2.360177 | 1.06E-06 | 0.000369 | 9.028633 | Up | "Homo sapiens complement factor I (CFI), mRNA."                                                                                                                                          |
| ILMN_1676159 | MST4      | 2.058419 | 1.07E-06 | 0.00037  | 9.02088  | Up | "Homo sapiens serine/threonine protein kinase MST4 (MST4), transcript variant 1, mRNA."                                                                                                  |
| ILMN_2161577 | CXCL6     | 2.878104 | 1.08E-06 | 0.00037  | 9.013643 | Up | "Homo sapiens chemokine (C-X-C motif) ligand 6 (granulocyte chemotactic protein 2) (CXCL6), mRNA."                                                                                       |
| ILMN_1813361 | ANGPTL7   | 2.886197 | 1.09E-06 | 0.00037  | 9.008491 | Up | "Homo sapiens angiopoietin-like 7 (ANGPTL7), mRNA."                                                                                                                                      |
| ILMN_1732066 | CKMT1A    | 2.961308 | 1.13E-06 | 0.000382 | 8.974911 | Up | "Homo sapiens creatine kinase, mitochondrial 1A (CKMT1A), nuclear gene encoding mitochondrial protein, mRNA."                                                                            |
| ILMN_1790778 | PNMA2     | 2.05003  | 1.14E-06 | 0.000383 | 8.96596  | Up | "Homo sapiens paraneoplastic antigen MA2 (PNMA2), mRNA."                                                                                                                                 |
| ILMN_1677851 | RARRES1   | 1.716003 | 1.18E-06 | 0.000389 | 8.938952 | Up | "Homo sapiens retinoic acid receptor responder (tazarotene induced) 1 (RARRES1), transcript variant 2, mRNA."                                                                            |
| ILMN_1669114 | WNK4      | 1.599267 | 1.18E-06 | 0.000389 | 8.935872 | Up | "Homo sapiens WNK lysine deficient protein kinase 4 (WNK4), mRNA."                                                                                                                       |
| ILMN_2383707 | ALDH1A2   | 2.927523 | 1.24E-06 | 0.000405 | 8.895787 | Up | "Homo sapiens aldehyde dehydrogenase 1 family, member A2 (ALDH1A2), transcript variant 2, mRNA."                                                                                         |
| ILMN_1808824 | NEBL      | 1.935725 | 1.35E-06 | 0.000436 | 8.82272  | Up | "Homo sapiens nebulin (NEBL), transcript variant 1, mRNA."                                                                                                                               |
| ILMN_2367010 | GPR126    | 1.970507 | 1.37E-06 | 0.000437 | 8.815295 | Up | "Homo sapiens G protein-coupled receptor 126 (GPR126), transcript variant a2, mRNA."                                                                                                     |
| ILMN_1718731 | KLK5      | 3.135594 | 1.4E-06  | 0.000439 | 8.794491 | Up | "Homo sapiens kallikrein-related peptidase 5 (KLK5), transcript variant 2, mRNA."                                                                                                        |
| ILMN_1702363 | SULF1     | 3.49223  | 1.41E-06 | 0.00044  | 8.787201 | Up | "Homo sapiens sulfatase 1 (SULF1), mRNA."                                                                                                                                                |
| ILMN_3242004 | ANXA8L1   | 3.758194 | 1.73E-06 | 0.000528 | 8.619605 | Up | "Homo sapiens annexin A8-like 1 (ANXA8L1), mRNA."                                                                                                                                        |
| ILMN_1816925 | LOC728473 | 2.697548 | 1.73E-06 | 0.000528 | 8.618838 | Up | "PREDICTED: Homo sapiens hypothetical LOC728473 (LOC728473), mRNA."                                                                                                                      |
| ILMN_3240912 | LRRN4     | 2.804071 | 1.75E-06 | 0.000531 | 8.608597 | Up | "Homo sapiens leucine rich repeat neuronal 4 (LRRN4), mRNA."                                                                                                                             |
| ILMN_1695745 | DISP1     | 1.932126 | 1.77E-06 | 0.000534 | 8.598658 | Up | "Homo sapiens dispatched homolog 1 (Drosophila) (DISP1), mRNA."                                                                                                                          |
| ILMN_1682226 | CLDN15    | 2.713352 | 1.86E-06 | 0.000556 | 8.5604   | Up | "Homo sapiens claudin 15 (CLDN15), mRNA."                                                                                                                                                |
| ILMN_1722869 | PDZD3     | 2.668778 | 1.95E-06 | 0.000577 | 8.519717 | Up | "Homo sapiens PDZ domain containing 3 (PDZD3), mRNA."                                                                                                                                    |
| ILMN_1717886 | PKHD1L1   | 3.217471 | 1.98E-06 | 0.00058  | 8.507096 | Up | "Homo sapiens polycystic kidney and hepatic disease 1 (autosomal recessive)-like 1 (PKHD1L1), mRNA."                                                                                     |
| ILMN_1746699 | SGOL2     | 2.260661 | 1.99E-06 | 0.00058  | 8.50294  | Up | "Homo sapiens shugoshin-like 2 (S. pombe) (SGOL2), mRNA."                                                                                                                                |
| ILMN_1696731 | LOC652683 | 2.051993 | 2.02E-06 | 0.00058  | 8.492367 | Up | "PREDICTED: Homo sapiens similar to sperm protein associated with the nucleus, X chromosome, family member B1 (LOC652683), mRNA."                                                        |
| ILMN_1691127 | VTN       | 2.607338 | 2.02E-06 | 0.00058  | 8.490112 | Up | "Homo sapiens vitronectin (VTN), mRNA."                                                                                                                                                  |
| ILMN_1796737 | APM-1     | 1.702838 | 2.07E-06 | 0.00059  | 8.470807 | Up | "PREDICTED: Homo sapiens BTB/POZ-zinc finger protein-like (APM-1), mRNA."                                                                                                                |
| ILMN_1691616 | LOC727935 | 1.804348 | 2.09E-06 | 0.00059  | 8.461898 | Up | "PREDICTED: Homo sapiens similar to CHRNA7 (cholinergic receptor, nicotinic, alpha 7, exons 5-10) and FAM7A (family with sequence similarity 7A, exons A-E) fusion (LOC727935), mRNA."   |
| ILMN_1778319 | DMKN      | 2.72107  | 2.14E-06 | 0.000598 | 8.442916 | Up | "Homo sapiens dermokine (DMKN), transcript variant 1, mRNA."                                                                                                                             |
| ILMN_3288032 | LOC646576 | 2.678613 | 2.25E-06 | 0.00062  | 8.402909 | Up | "PREDICTED: Homo sapiens hypothetical LOC646576 (LOC646576), miscRNA."                                                                                                                   |
| ILMN_1718046 | ARNT2     | 2.196993 | 2.29E-06 | 0.000626 | 8.39058  | Up | "Homo sapiens aryl-hydrocarbon receptor nuclear translocator 2 (ARNT2), mRNA."                                                                                                           |
| ILMN_1716608 | NGF       | 1.861727 | 2.41E-06 | 0.000648 | 8.347986 | Up | "Homo sapiens nerve growth factor (beta polypeptide) (NGF), mRNA."                                                                                                                       |

|              |           |          |          |          |          |    |                                                                                                                                              |
|--------------|-----------|----------|----------|----------|----------|----|----------------------------------------------------------------------------------------------------------------------------------------------|
| ILMN_1704294 | CDH3      | 2.626307 | 2.46E-06 | 0.000658 | 8.331119 | Up | "Homo sapiens cadherin 3, type 1, P-cadherin (placental) (CDH3), mRNA."                                                                      |
| ILMN_1733110 | RASSF7    | 2.586511 | 2.48E-06 | 0.000658 | 8.325354 | Up | "Homo sapiens Ras association (RalGDS/AF-6) domain family (N-terminal) member 7 (RASSF7), mRNA."                                             |
| ILMN_1666545 | GCNT1     | 1.684177 | 2.49E-06 | 0.000658 | 8.322885 | Up | "Homo sapiens glucosaminyl (N-acetyl) transferase 1, core 2 (beta-1,6-N-acetylglucosaminyltransferase) (GCNT1), transcript variant 4, mRNA." |
| ILMN_1718770 | FLJ36070  | 2.370868 | 2.7E-06  | 0.000709 | 8.258821 | Up | "Homo sapiens likely ortholog of MEF2-activating SAP transcriptional regulator (FLJ36070), mRNA."                                            |
| ILMN_1753143 | RHPN2     | 2.104419 | 2.86E-06 | 0.000743 | 8.212256 | Up | "Homo sapiens raphilin, Rho GTPase binding protein 2 (RHPN2), mRNA."                                                                         |
| ILMN_2405667 | CLDN15    | 2.813261 | 2.98E-06 | 0.00077  | 8.179407 | Up | "Homo sapiens claudin 15 (CLDN15), transcript variant 2, mRNA."                                                                              |
| ILMN_2339835 | PTGS1     | 2.493566 | 3.08E-06 | 0.000788 | 8.152012 | Up | "Homo sapiens prostaglandin-endoperoxide synthase 1 (prostaglandin G/H synthase and cyclooxygenase) (PTGS1), transcript variant 2, mRNA."    |
| ILMN_1762531 | FGF9      | 3.185156 | 3.17E-06 | 0.000802 | 8.129833 | Up | "Homo sapiens fibroblast growth factor 9 (glia-activating factor) (FGF9), mRNA."                                                             |
| ILMN_2082865 | PLLP      | 2.566417 | 3.3E-06  | 0.000825 | 8.099165 | Up | "Homo sapiens plasma membrane proteolipid (plasmolipin) (PLLP), mRNA."                                                                       |
| ILMN_1804351 | FZD7      | 2.033119 | 3.43E-06 | 0.000844 | 8.068868 | Up | "Homo sapiens frizzled homolog 7 (Drosophila) (FZD7), mRNA."                                                                                 |
| ILMN_1723962 | LXN       | 1.754772 | 3.58E-06 | 0.000872 | 8.033215 | Up | "Homo sapiens latexin (LXN), mRNA."                                                                                                          |
| ILMN_1657760 | SYT17     | 2.153077 | 3.59E-06 | 0.000872 | 8.031057 | Up | "Homo sapiens synaptotagmin XVII (SYT17), mRNA."                                                                                             |
| ILMN_1758067 | RGS4      | 2.761846 | 3.63E-06 | 0.000876 | 8.02381  | Up | "Homo sapiens regulator of G-protein signalling 4 (RGS4), mRNA."                                                                             |
| ILMN_1681983 | RSPO3     | 1.750447 | 3.79E-06 | 0.000889 | 7.988951 | Up | "Homo sapiens R-spondin 3 homolog (Xenopus laevis) (RSPO3), mRNA."                                                                           |
| ILMN_1667162 | NKX3-1    | 1.857274 | 3.86E-06 | 0.0009   | 7.975407 | Up | "Homo sapiens NK3 homeobox 1 (NKX3-1), mRNA."                                                                                                |
| ILMN_1695945 | MEIS2     | 1.739552 | 3.89E-06 | 0.000902 | 7.969435 | Up | "Homo sapiens Meis homeobox 2 (MEIS2), transcript variant g, mRNA."                                                                          |
| ILMN_3246728 | C13ORF36  | 3.765265 | 3.96E-06 | 0.000914 | 7.955722 | Up | "Homo sapiens chromosome 13 open reading frame 36 (C13orf36), mRNA."                                                                         |
| ILMN_1660727 | ENPP5     | 1.77666  | 3.99E-06 | 0.000917 | 7.949111 | Up | "Homo sapiens ectonucleotide pyrophosphatase/phosphodiesterase 5 (putative function) (ENPP5), mRNA."                                         |
| ILMN_1752884 | AADACL2   | 2.595614 | 4.25E-06 | 0.000967 | 7.900815 | Up | "Homo sapiens arylacetamide deacetylase-like 2 (AADACL2), mRNA."                                                                             |
| ILMN_1696657 | LRRN2     | 1.906481 | 4.29E-06 | 0.00097  | 7.893695 | Up | "Homo sapiens leucine rich repeat neuronal 2 (LRRN2), transcript variant 2, mRNA."                                                           |
| ILMN_1770338 | TM4SF1    | 1.364928 | 4.32E-06 | 0.00097  | 7.888162 | Up | "Homo sapiens transmembrane 4 L six family member 1 (TM4SF1), mRNA."                                                                         |
| ILMN_1763491 | CKMT1B    | 1.740596 | 4.36E-06 | 0.00097  | 7.880575 | Up | "Homo sapiens creatine kinase, mitochondrial 1B (CKMT1B), nuclear gene encoding mitochondrial protein, mRNA."                                |
| ILMN_2341548 | MYO5B     | 2.097867 | 4.36E-06 | 0.00097  | 7.88006  | Up | "Homo sapiens myosin VB (MYO5B), mRNA."                                                                                                      |
| ILMN_1659631 | LOC730024 | 1.621957 | 4.37E-06 | 0.00097  | 7.879882 | Up | "PREDICTED: Homo sapiens similar to male sterility domain containing 1 (LOC730024), mRNA."                                                   |
| ILMN_2391264 | DMKN      | 2.628842 | 4.93E-06 | 0.001064 | 7.787093 | Up | "Homo sapiens dermokine (DMKN), transcript variant 2, mRNA."                                                                                 |
| ILMN_2311020 | DNAJC12   | 1.411457 | 5.05E-06 | 0.00108  | 7.768602 | Up | "Homo sapiens DnaJ (Hsp40) homolog, subfamily C, member 12 (DNAJC12), transcript variant 2, mRNA."                                           |
| ILMN_1713182 | LOC653879 | 1.889046 | 5.06E-06 | 0.00108  | 7.765824 | Up | "PREDICTED: Homo sapiens similar to Complement C3 precursor (LOC653879), mRNA."                                                              |
| ILMN_2413780 | SEZ6L2    | 1.41428  | 5.22E-06 | 0.001108 | 7.742654 | Up | "Homo sapiens seizure related 6 homolog (mouse)-like 2 (SEZ6L2), transcript variant 2, mRNA."                                                |
| ILMN_2405254 | GRB7      | 1.544549 | 5.62E-06 | 0.001172 | 7.686265 | Up | "Homo sapiens growth factor receptor-bound protein 7 (GRB7), transcript variant 2, mRNA."                                                    |
| ILMN_1716397 | LAYN      | 2.095069 | 5.77E-06 | 0.001186 | 7.666123 | Up | "Homo sapiens layilin (LAYN), mRNA."                                                                                                         |
| ILMN_1779182 | TMEM98    | 2.051822 | 5.79E-06 | 0.001186 | 7.663972 | Up | "Homo sapiens transmembrane protein 98 (TMEM98), transcript variant 2, mRNA."                                                                |
| ILMN_1721134 | TGM1      | 3.333386 | 6.09E-06 | 0.001231 | 7.625772 | Up | "Homo sapiens transglutaminase 1 (K polypeptide epidermal type 1, protein-glutamine-gamma-glutamyltransferase) (TGM1), mRNA."                |
| ILMN_2317751 | REC8      | 2.25329  | 6.14E-06 | 0.001231 | 7.619525 | Up | "Homo sapiens REC8 homolog (yeast) (REC8), transcript variant 1, mRNA."                                                                      |

|              |           |          |          |          |          |    |                                                                                                                               |
|--------------|-----------|----------|----------|----------|----------|----|-------------------------------------------------------------------------------------------------------------------------------|
| ILMN_1662166 | PTK7      | 1.829408 | 6.2E-06  | 0.001236 | 7.612695 | Up | "Homo sapiens PTK7 protein tyrosine kinase 7 (PTK7), transcript variant PTK7-4, mRNA."                                        |
| ILMN_2065022 | KIAA0672  | 2.640527 | 6.22E-06 | 0.001236 | 7.609776 | Up | "Homo sapiens KIAA0672 gene product (KIAA0672), mRNA."                                                                        |
| ILMN_1695404 | LY6E      | 1.368312 | 6.28E-06 | 0.001239 | 7.602136 | Up | "Homo sapiens lymphocyte antigen 6 complex, locus E (LY6E), mRNA."                                                            |
| ILMN_1816603 | HS.31961  | 1.283292 | 6.36E-06 | 0.001249 | 7.592761 | Up | "Homo sapiens cDNA FLJ37694 fis, clone BRHIP2015224"                                                                          |
| ILMN_1797526 | LOC400120 | 3.537561 | 6.53E-06 | 0.001278 | 7.572648 | Up | "Homo sapiens hypothetical LOC400120 (LOC400120), mRNA."                                                                      |
| ILMN_1759766 | CTXN1     | 3.47018  | 6.82E-06 | 0.001314 | 7.54055  | Up | "Homo sapiens cortixin 1 (CTXN1), mRNA."                                                                                      |
| ILMN_2068104 | TFPI2     | 2.774673 | 6.86E-06 | 0.001314 | 7.53643  | Up | "Homo sapiens tissue factor pathway inhibitor 2 (TFPI2), mRNA."                                                               |
| ILMN_1658071 | ATP1B1    | 1.648157 | 6.92E-06 | 0.001319 | 7.529286 | Up | "Homo sapiens ATPase, Na <sup>+</sup> /K <sup>+</sup> transporting, beta 1 polypeptide (ATP1B1), transcript variant 1, mRNA." |
| ILMN_2407703 | SYN1      | 1.281211 | 6.94E-06 | 0.001319 | 7.527473 | Up | "Homo sapiens synapsin I (SYN1), transcript variant Ia, mRNA."                                                                |
| ILMN_1682326 | PCP4      | 3.545234 | 7.2E-06  | 0.001347 | 7.499895 | Up | "Homo sapiens Purkinje cell protein 4 (PCP4), mRNA."                                                                          |
| ILMN_3245564 | RICH2     | 2.530368 | 7.39E-06 | 0.001377 | 7.480547 | Up | "Homo sapiens Rho-type GTPase-activating protein RICH2 (RICH2), mRNA."                                                        |
| ILMN_1760153 | GATA5     | 2.98878  | 7.9E-06  | 0.001467 | 7.430379 | Up | "Homo sapiens GATA binding protein 5 (GATA5), mRNA."                                                                          |
| ILMN_1804673 | SLC16A4   | 1.821959 | 8.05E-06 | 0.001479 | 7.417072 | Up | "Homo sapiens solute carrier family 16, member 4 (monocarboxylic acid transporter 5) (SLC16A4), mRNA."                        |
| ILMN_1724480 | AXIN2     | 1.456288 | 8.1E-06  | 0.001479 | 7.412293 | Up | "Homo sapiens axin 2 (conductin, axil) (AXIN2), mRNA."                                                                        |
| ILMN_1734366 | RORC      | 2.541547 | 9.04E-06 | 0.001614 | 7.331292 | Up | "Homo sapiens RAR-related orphan receptor C (RORC), transcript variant 2, mRNA."                                              |
| ILMN_1806787 | CSDC2     | 2.055096 | 9.29E-06 | 0.001641 | 7.311439 | Up | "Homo sapiens cold shock domain containing C2, RNA binding (CSDC2), mRNA."                                                    |
| ILMN_1751886 | REC8      | 2.529298 | 9.32E-06 | 0.001641 | 7.309212 | Up | "Homo sapiens REC8 homolog (yeast) (REC8), transcript variant 1, mRNA."                                                       |
| ILMN_1731561 | ROBO3     | 1.635066 | 9.35E-06 | 0.001641 | 7.306176 | Up | "Homo sapiens roundabout, axon guidance receptor, homolog 3 (Drosophila) (ROBO3), mRNA."                                      |
| ILMN_2217601 | ANXA9     | 2.276037 | 9.39E-06 | 0.001641 | 7.303006 | Up | "Homo sapiens annexin A9 (ANXA9), mRNA."                                                                                      |
| ILMN_1774287 | CFB       | 2.940322 | 9.48E-06 | 0.001648 | 7.296754 | Up | "Homo sapiens complement factor B (CFB), mRNA."                                                                               |
| ILMN_2353202 | PTK7      | 2.268206 | 9.68E-06 | 0.001679 | 7.280723 | Up | "Homo sapiens PTK7 protein tyrosine kinase 7 (PTK7), transcript variant PTK7-2, mRNA."                                        |
| ILMN_1751346 | ERBB3     | 1.96611  | 1.09E-05 | 0.001855 | 7.192967 | Up | "Homo sapiens v-erb-b2 erythroblastic leukemia viral oncogene homolog 3 (avian) (ERBB3), transcript variant 1, mRNA."         |
| ILMN_1730229 | CGNL1     | 2.190276 | 1.09E-05 | 0.001855 | 7.192222 | Up | "Homo sapiens cingulin-like 1 (CGNL1), mRNA."                                                                                 |
| ILMN_1662390 | ASPHD1    | 1.708512 | 1.11E-05 | 0.001865 | 7.182906 | Up | "Homo sapiens aspartate beta-hydroxylase domain containing 1 (ASPHD1), mRNA."                                                 |
| ILMN_1717262 | PROCR     | 2.385376 | 1.13E-05 | 0.001892 | 7.167481 | Up | "Homo sapiens protein C receptor, endothelial (EPCR) (PROCR), mRNA."                                                          |
| ILMN_1809639 | TMEM26    | 1.324194 | 1.14E-05 | 0.001894 | 7.164273 | Up | "Homo sapiens transmembrane protein 26 (TMEM26), mRNA."                                                                       |
| ILMN_1733746 | REEP1     | 3.153963 | 1.14E-05 | 0.001894 | 7.161482 | Up | "Homo sapiens receptor accessory protein 1 (REEP1), mRNA."                                                                    |
| ILMN_2328776 | MST4      | 2.798005 | 1.16E-05 | 0.001903 | 7.151526 | Up | "Homo sapiens serine/threonine protein kinase MST4 (MST4), transcript variant 2, mRNA."                                       |
| ILMN_1752965 | GREM1     | 2.359404 | 1.16E-05 | 0.001903 | 7.14801  | Up | "Homo sapiens gremlin 1, cysteine knot superfamily, homolog (Xenopus laevis) (GREM1), mRNA."                                  |
| ILMN_1804662 | NRG4      | 1.571959 | 1.18E-05 | 0.00193  | 7.135205 | Up | "Homo sapiens neuregulin 4 (NRG4), mRNA."                                                                                     |
| ILMN_1691790 | DACT2     | 2.328308 | 1.2E-05  | 0.001953 | 7.124431 | Up | "Homo sapiens dapper, antagonist of beta-catenin, homolog 2 (Xenopus laevis) (DACT2), mRNA."                                  |
| ILMN_1688154 | MST1R     | 1.563182 | 1.26E-05 | 0.002034 | 7.092512 | Up | "Homo sapiens macrophage stimulating 1 receptor (c-met-related tyrosine kinase) (MST1R), mRNA."                               |
| ILMN_1749474 | FAM7A1    | 1.55779  | 1.28E-05 | 0.002055 | 7.08038  | Up | "PREDICTED: Homo sapiens family with sequence similarity 7, member A1, transcript variant 4 (FAM7A1), mRNA."                  |
| ILMN_1740728 | SMTNL2    | 2.144266 | 1.3E-05  | 0.002074 | 7.068826 | Up | "Homo sapiens smoothelin-like 2 (SMTNL2), mRNA."                                                                              |
| ILMN_1695041 | GATA6     | 1.258501 | 1.3E-05  | 0.002074 | 7.068658 | Up | "Homo sapiens GATA binding protein 6 (GATA6), mRNA."                                                                          |

|              |           |          |          |          |          |    |                                                                                                              |
|--------------|-----------|----------|----------|----------|----------|----|--------------------------------------------------------------------------------------------------------------|
| ILMN_1676215 | DLG2      | 1.96164  | 1.31E-05 | 0.002085 | 7.062482 | Up | "Homo sapiens discs, large homolog 2, chapsyn-110 (Drosophila) (DLG2), mRNA."                                |
| ILMN_2111229 | BZRAP1    | 1.354025 | 1.34E-05 | 0.002123 | 7.044921 | Up | "Homo sapiens benzodiazapine receptor (peripheral) associated protein 1 (BZRAP1), mRNA."                     |
| ILMN_1708580 | PDZK1IP1  | 1.753909 | 1.36E-05 | 0.002126 | 7.036788 | Up | "Homo sapiens PDZK1 interacting protein 1 (PDZK1IP1), mRNA."                                                 |
| ILMN_1722056 | ATP7B     | 1.676645 | 1.4E-05  | 0.002168 | 7.012248 | Up | "Homo sapiens ATPase, Cu <sup>++</sup> transporting, beta polypeptide (ATP7B), transcript variant 1, mRNA."  |
| ILMN_1873278 | LOC731895 | 2.348424 | 1.47E-05 | 0.002245 | 6.979063 | Up | "PREDICTED: Homo sapiens similar to transmembrane protein 28 (LOC731895), mRNA."                             |
| ILMN_1779855 | HSD17B6   | 3.946054 | 1.56E-05 | 0.002342 | 6.935512 | Up | "Homo sapiens hydroxysteroid (17-beta) dehydrogenase 6 homolog (mouse) (HSD17B6), mRNA."                     |
| ILMN_1798690 | ADAMTSL3  | 1.70997  | 1.62E-05 | 0.002421 | 6.908997 | Up | "Homo sapiens ADAMTS-like 3 (ADAMTSL3), mRNA."                                                               |
| ILMN_2043809 | PFKM      | 1.373457 | 1.7E-05  | 0.002521 | 6.874418 | Up | "Homo sapiens phosphofructokinase, muscle (PFKM), mRNA."                                                     |
| ILMN_1833858 | HS.66187  | 1.386655 | 1.79E-05 | 0.002623 | 6.839835 | Up | Homo sapiens clone 23700 mRNA sequence                                                                       |
| ILMN_1736412 | AMHR2     | 2.260726 | 1.82E-05 | 0.002648 | 6.826794 | Up | "Homo sapiens anti-Mullerian hormone receptor, type II (AMHR2), mRNA."                                       |
| ILMN_1695316 | SLC39A8   | 2.552958 | 1.87E-05 | 0.002701 | 6.810624 | Up | "Homo sapiens solute carrier family 39 (zinc transporter), member 8 (SLC39A8), transcript variant 1, mRNA."  |
| ILMN_1776724 | LYPD6     | 2.098231 | 1.88E-05 | 0.002712 | 6.804506 | Up | "Homo sapiens LY6/PLAUR domain containing 6 (LYPD6), mRNA."                                                  |
| ILMN_1713995 | SCNN1A    | 1.758591 | 1.89E-05 | 0.002712 | 6.803637 | Up | "Homo sapiens sodium channel, nonvoltage-gated 1 alpha (SCNN1A), mRNA."                                      |
| ILMN_1745817 | NELL1     | 2.505614 | 1.92E-05 | 0.002752 | 6.789061 | Up | "Homo sapiens NEL-like 1 (chicken) (NELL1), mRNA."                                                           |
| ILMN_1699978 | FAM70A    | 1.963188 | 2.06E-05 | 0.002895 | 6.743155 | Up | "Homo sapiens family with sequence similarity 70, member A (FAM70A), mRNA."                                  |
| ILMN_1699768 | CBLN4     | 2.1116   | 2.08E-05 | 0.002913 | 6.734822 | Up | "Homo sapiens cerebellin 4 precursor (CBLN4), mRNA."                                                         |
| ILMN_1693836 | LOC653344 | 2.504504 | 2.12E-05 | 0.002937 | 6.722834 | Up | "PREDICTED: Homo sapiens similar to cis-Golgi matrix protein GM130, transcript variant 2 (LOC653344), mRNA." |
| ILMN_1787673 | PLLP      | 2.139423 | 2.15E-05 | 0.002963 | 6.71074  | Up | "Homo sapiens plasma membrane proteolipid (plasmolipin) (PLLP), mRNA."                                       |
| ILMN_1687867 | LOC647954 | 1.998641 | 2.2E-05  | 0.002988 | 6.696089 | Up | "PREDICTED: Homo sapiens misc_RNA (LOC647954), miscRNA."                                                     |
| ILMN_1715068 | AQP9      | 2.671201 | 2.23E-05 | 0.002988 | 6.686865 | Up | "Homo sapiens aquaporin 9 (AQP9), mRNA."                                                                     |
| ILMN_1738684 | NRXN2     | 1.66062  | 2.38E-05 | 0.003167 | 6.642662 | Up | "Homo sapiens neurexin 2 (NRXN2), transcript variant beta, mRNA."                                            |
| ILMN_1727087 | GJA1      | 1.493614 | 2.44E-05 | 0.00322  | 6.623608 | Up | "Homo sapiens gap junction protein, alpha 1, 43kDa (GJA1), mRNA."                                            |
| ILMN_1656373 | BNC2      | 1.457398 | 2.46E-05 | 0.003227 | 6.618235 | Up | "Homo sapiens basonuclein 2 (BNC2), mRNA."                                                                   |
| ILMN_1772312 | BARX1     | 2.076594 | 2.53E-05 | 0.003291 | 6.598051 | Up | "Homo sapiens BARX homeobox 1 (BARX1), mRNA."                                                                |
| ILMN_1746784 | SLAIN1    | 1.585206 | 2.55E-05 | 0.003301 | 6.593055 | Up | "Homo sapiens SLAIN motif family, member 1 (SLAIN1), transcript variant 1, mRNA."                            |
| ILMN_1711566 | TIMP1     | 1.506015 | 2.62E-05 | 0.003367 | 6.575826 | Up | "Homo sapiens TIMP metalloproteinase inhibitor 1 (TIMP1), mRNA."                                             |
| ILMN_1813100 | KIAA1244  | 1.380956 | 2.72E-05 | 0.003471 | 6.549343 | Up | "Homo sapiens KIAA1244 (KIAA1244), mRNA."                                                                    |
| ILMN_1778333 | MMP24     | 1.87809  | 2.76E-05 | 0.00349  | 6.540064 | Up | "Homo sapiens matrix metalloproteinase 24 (membrane-inserted) (MMP24), mRNA."                                |
| ILMN_1652456 | TMEM98    | 2.183557 | 2.79E-05 | 0.003526 | 6.531227 | Up | "Homo sapiens transmembrane protein 98 (TMEM98), transcript variant 1, mRNA."                                |
| ILMN_1677505 | CCL21     | 3.631937 | 2.83E-05 | 0.003561 | 6.522231 | Up | "Homo sapiens chemokine (C-C motif) ligand 21 (CCL21), mRNA."                                                |
| ILMN_1695606 | EFNB3     | 2.595261 | 2.85E-05 | 0.003571 | 6.517153 | Up | "Homo sapiens ephrin-B3 (EFNB3), mRNA."                                                                      |
| ILMN_1811387 | TFF3      | 3.407857 | 2.92E-05 | 0.003633 | 6.501418 | Up | "Homo sapiens trefoil factor 3 (intestinal) (TFF3), mRNA."                                                   |
| ILMN_1812679 | UPK1B     | 2.592163 | 2.99E-05 | 0.003679 | 6.486055 | Up | "Homo sapiens uroplakin 1B (UPK1B), mRNA."                                                                   |
| ILMN_1680925 | SLC9A3R1  | 1.578439 | 3.02E-05 | 0.00371  | 6.478653 | Up | "Homo sapiens solute carrier family 9 (sodium/hydrogen exchanger), member 3 regulator 1 (SLC9A3R1), mRNA."   |
| ILMN_2386982 | PRKCZ     | 1.803615 | 3.05E-05 | 0.003722 | 6.471953 | Up | "Homo sapiens protein kinase C, zeta (PRKCZ), transcript variant 1, mRNA."                                   |

|              |              |          |          |          |          |    |                                                                                                                                           |
|--------------|--------------|----------|----------|----------|----------|----|-------------------------------------------------------------------------------------------------------------------------------------------|
| ILMN_1754103 | CLDN11       | 1.833073 | 3.09E-05 | 0.003746 | 6.463242 | Up | "Homo sapiens claudin 11 (oligodendrocyte transmembrane protein) (CLDN11), mRNA."                                                         |
| ILMN_1811133 | LOC645464    | 2.502862 | 3.14E-05 | 0.003788 | 6.452321 | Up | "PREDICTED: Homo sapiens similar to vasoactive intestinal peptide receptor 2 (LOC645464), mRNA."                                          |
| ILMN_1803855 | FAIM2        | 1.801051 | 3.21E-05 | 0.00383  | 6.437822 | Up | "Homo sapiens Fas apoptotic inhibitory molecule 2 (FAIM2), mRNA."                                                                         |
| ILMN_3254481 | LOC100128893 | 2.088876 | 3.29E-05 | 0.003909 | 6.42068  | Up | "PREDICTED: Homo sapiens hypothetical protein LOC100128893 (LOC100128893), mRNA."                                                         |
| ILMN_1769388 | GJB2         | 2.07804  | 3.3E-05  | 0.003915 | 6.417999 | Up | "Homo sapiens gap junction protein, beta 2, 26kDa (GJB2), mRNA."                                                                          |
| ILMN_1741406 | HOOK1        | 1.508036 | 3.33E-05 | 0.003926 | 6.412872 | Up | "Homo sapiens hook homolog 1 (Drosophila) (HOOK1), mRNA."                                                                                 |
| ILMN_1742534 | COL4A5       | 1.912801 | 3.35E-05 | 0.003936 | 6.407654 | Up | "Homo sapiens collagen, type IV, alpha 5 (COL4A5), transcript variant 1, mRNA."                                                           |
| ILMN_1738742 | PLAT         | 2.099942 | 3.46E-05 | 0.004027 | 6.387078 | Up | "Homo sapiens plasminogen activator, tissue (PLAT), transcript variant 1, mRNA."                                                          |
| ILMN_3283316 | LOC255167    | 2.454383 | 3.49E-05 | 0.004038 | 6.380258 | Up | "Homo sapiens hypothetical LOC255167 (LOC255167), non-coding RNA."                                                                        |
| ILMN_2064902 | HAND2        | 1.719838 | 3.61E-05 | 0.004128 | 6.357356 | Up | "Homo sapiens heart and neural crest derivatives expressed 2 (HAND2), mRNA."                                                              |
| ILMN_1658356 | PAMR1        | 2.41916  | 3.79E-05 | 0.004273 | 6.324923 | Up | "Homo sapiens peptidase domain containing associated with muscle regeneration 1 (PAMR1), transcript variant 1, mRNA."                     |
| ILMN_1656837 | RBP1         | 2.188879 | 3.79E-05 | 0.004273 | 6.324369 | Up | "Homo sapiens retinol binding protein 1, cellular (RBP1), mRNA."                                                                          |
| ILMN_1779228 | CDH2         | 1.762561 | 3.95E-05 | 0.004396 | 6.297512 | Up | "Homo sapiens cadherin 2, type 1, N-cadherin (neuronal) (CDH2), mRNA."                                                                    |
| ILMN_1655614 | DSP          | 2.292337 | 4.03E-05 | 0.00445  | 6.28303  | Up | "Homo sapiens desmoplakin (DSP), transcript variant 2, mRNA."                                                                             |
| ILMN_1676413 | VSNL1        | 1.960397 | 4.13E-05 | 0.004507 | 6.267106 | Up | "Homo sapiens visinin-like 1 (VSNL1), mRNA."                                                                                              |
| ILMN_2086612 | CMAH         | 1.791827 | 4.17E-05 | 0.00452  | 6.2603   | Up | "Homo sapiens cytidine monophosphate-N-acetylneuraminic acid hydroxylase (CMP-N-acetylneuraminate monooxygenase) (CMAH) on chromosome 6." |
| ILMN_1814629 | ZC3H12B      | 1.298513 | 4.26E-05 | 0.004567 | 6.247272 | Up | "Homo sapiens zinc finger CCCH-type containing 12B (ZC3H12B), mRNA."                                                                      |
| ILMN_1716869 | GPM6A        | 1.932099 | 4.32E-05 | 0.00463  | 6.236655 | Up | "Homo sapiens glycoprotein M6A (GPM6A), transcript variant 3, mRNA."                                                                      |
| ILMN_1653415 | SPANXA2      | 1.599955 | 4.5E-05  | 0.004796 | 6.210309 | Up | "Homo sapiens SPANX family, member A2 (SPANXA2), mRNA."                                                                                   |
| ILMN_2080684 | IQCA1        | 1.453943 | 4.56E-05 | 0.004835 | 6.20192  | Up | "Homo sapiens IQ motif containing with AAA domain 1 (IQCA1), mRNA."                                                                       |
| ILMN_2407824 | ATP1B1       | 1.457675 | 4.69E-05 | 0.004942 | 6.183235 | Up | "Homo sapiens ATPase, Na <sup>+</sup> /K <sup>+</sup> transporting, beta 1 polypeptide (ATP1B1), transcript variant 2, mRNA."             |
| ILMN_1811779 | MGC24103     | 1.517181 | 4.72E-05 | 0.004963 | 6.178743 | Up | "PREDICTED: Homo sapiens hypothetical protein MGC24103 (MGC24103), misc RNA."                                                             |
| ILMN_1684959 | ASTN1        | 1.853175 | 4.74E-05 | 0.004977 | 6.17539  | Up | "Homo sapiens astrotactin 1 (ASTN1), transcript variant 1, mRNA."                                                                         |
| ILMN_3248511 | FAM167A      | 1.938317 | 4.87E-05 | 0.005081 | 6.157258 | Up | "Homo sapiens family with sequence similarity 167, member A (FAM167A), mRNA."                                                             |
| ILMN_2371911 | MUC1         | 1.848117 | 4.89E-05 | 0.005084 | 6.155488 | Up | "Homo sapiens mucin 1, cell surface associated (MUC1), transcript variant 5, mRNA."                                                       |
| ILMN_1695946 | TRNP1        | 1.669292 | 4.91E-05 | 0.005088 | 6.152085 | Up | "Homo sapiens TMF1-regulated nuclear protein 1 (TRNP1), mRNA."                                                                            |
| ILMN_1755383 | LRRC1        | 2.11411  | 5.15E-05 | 0.005279 | 6.121001 | Up | "Homo sapiens leucine rich repeat containing 1 (LRRC1), mRNA."                                                                            |
| ILMN_1803024 | UPK3B        | 3.90218  | 5.26E-05 | 0.005329 | 6.106859 | Up | "Homo sapiens uroplakin 3B (UPK3B), transcript variant 1, mRNA."                                                                          |
| ILMN_1791679 | DNER         | 2.495098 | 5.28E-05 | 0.005329 | 6.104762 | Up | "Homo sapiens delta/notch-like EGF repeat containing (DNER), mRNA."                                                                       |
| ILMN_1666536 | VSIG2        | 1.551794 | 5.37E-05 | 0.005358 | 6.09394  | Up | "Homo sapiens V-set and immunoglobulin domain containing 2 (VSIG2), mRNA."                                                                |
| ILMN_1762260 | C3           | 1.950347 | 5.48E-05 | 0.005448 | 6.080246 | Up | "Homo sapiens complement component 3 (C3), mRNA."                                                                                         |
| ILMN_1802316 | SMPD3        | 2.113503 | 5.59E-05 | 0.00552  | 6.067458 | Up | "Homo sapiens sphingomyelin phosphodiesterase 3, neutral membrane (neutral sphingomyelinase II) (SMPD3), mRNA."                           |
| ILMN_1779374 | AMMECR1      | 1.565546 | 5.99E-05 | 0.005848 | 6.021463 | Up | "Homo sapiens Alport syndrome, mental retardation, midface hypoplasia and elliptocytosis chromosomal                                      |



|              |           |          |          |          |          |    |                                                                                                                                                                            |
|--------------|-----------|----------|----------|----------|----------|----|----------------------------------------------------------------------------------------------------------------------------------------------------------------------------|
|              |           |          |          |          |          |    | region gene 1 (AMMECR1), transcript variant 1, mRNA."                                                                                                                      |
| ILMN_1838863 | HS.497591 | 1.858529 | 6.07E-05 | 0.005874 | 6.013432 | Up | "Homo sapiens cDNA FLJ41846 fis, clone NT2RI3003162"                                                                                                                       |
| ILMN_1708340 | DAPK1     | 1.807793 | 6.09E-05 | 0.005886 | 6.010754 | Up | "Homo sapiens death-associated protein kinase 1 (DAPK1), mRNA."                                                                                                            |
| ILMN_1886092 | HS.383564 | 1.355482 | 6.26E-05 | 0.006006 | 5.992933 | Up | "Homo sapiens mRNA for KIAA0574 protein, partial cds"                                                                                                                      |
| ILMN_2413158 | PODXL     | 1.43928  | 6.27E-05 | 0.006006 | 5.991869 | Up | "Homo sapiens podocalyxin-like (PODXL), transcript variant 1, mRNA."                                                                                                       |
| ILMN_1772910 | GAS1      | 1.530076 | 6.5E-05  | 0.006187 | 5.969057 | Up | "Homo sapiens growth arrest-specific 1 (GAS1), mRNA."                                                                                                                      |
| ILMN_1789040 | SLITRK5   | 1.689541 | 6.57E-05 | 0.006239 | 5.962341 | Up | "Homo sapiens SLIT and NTRK-like family, member 5 (SLITRK5), mRNA."                                                                                                        |
| ILMN_1708267 | CLDN15    | 1.727801 | 6.64E-05 | 0.006288 | 5.954634 | Up | "Homo sapiens claudin 15 (CLDN15), transcript variant 2, mRNA."                                                                                                            |
| ILMN_3184067 | FLJ30428  | 1.565748 | 6.7E-05  | 0.006304 | 5.94907  | Up | "PREDICTED: Homo sapiens similar to hypothetical protein A230046P18; cDNA sequence BC055759, transcript variant 1 (FLJ30428), mRNA."                                       |
| ILMN_1697267 | PRKCZ     | 1.309813 | 6.87E-05 | 0.006386 | 5.933027 | Up | "Homo sapiens protein kinase C, zeta (PRKCZ), transcript variant 1, mRNA."                                                                                                 |
| ILMN_1692748 | BNC1      | 2.182669 | 6.91E-05 | 0.006415 | 5.928875 | Up | "Homo sapiens basoonin 1 (BNC1), mRNA."                                                                                                                                    |
| ILMN_1779234 | CXCL6     | 2.88685  | 7.12E-05 | 0.006514 | 5.910114 | Up | "Homo sapiens chemokine (C-X-C motif) ligand 6 (granulocyte chemotactic protein 2) (CXCL6), mRNA."                                                                         |
| ILMN_3241944 | NBLA00301 | 1.591827 | 7.43E-05 | 0.006777 | 5.882059 | Up | "Homo sapiens Nbla00301 (NBLA00301), non-coding RNA."                                                                                                                      |
| ILMN_2353276 | UPK3B     | 3.848915 | 7.47E-05 | 0.006799 | 5.878786 | Up | "Homo sapiens uroplakin 3B (UPK3B), transcript variant 2, mRNA."                                                                                                           |
| ILMN_1880012 | SEMA5A    | 1.278328 | 7.65E-05 | 0.006926 | 5.863406 | Up | "Homo sapiens sema domain, seven thrombospondin repeats (type 1 and type 1-like), transmembrane domain (TM) and short cytoplasmic domain, (semaphorin) 5A (SEMA5A), mRNA." |
| ILMN_1778964 | CLIC5     | 2.321624 | 7.65E-05 | 0.006926 | 5.863158 | Up | "Homo sapiens chloride intracellular channel 5 (CLIC5), mRNA."                                                                                                             |
| ILMN_1748970 | PRR15L    | 1.850894 | 7.87E-05 | 0.007057 | 5.845183 | Up | "Homo sapiens proline rich 15-like (PRR15L), mRNA."                                                                                                                        |
| ILMN_1723443 | LRP2      | 2.62107  | 7.94E-05 | 0.007105 | 5.83937  | Up | "Homo sapiens low density lipoprotein-related protein 2 (LRP2), mRNA."                                                                                                     |
| ILMN_1783149 | CDH23     | 1.50399  | 8.37E-05 | 0.007339 | 5.805459 | Up | "Homo sapiens cadherin-like 23 (CDH23), transcript variant 1, mRNA."                                                                                                       |
| ILMN_1687306 | LGALS2    | 1.725481 | 8.59E-05 | 0.007482 | 5.789528 | Up | "Homo sapiens lectin, galactoside-binding, soluble, 2 (LGALS2), mRNA."                                                                                                     |
| ILMN_2403534 | ALOX15    | 1.360589 | 8.64E-05 | 0.007499 | 5.785772 | Up | "Homo sapiens arachidonate 15-lipoxygenase (ALOX15), mRNA."                                                                                                                |
| ILMN_2264177 | UPK3B     | 4.333265 | 8.77E-05 | 0.007567 | 5.775635 | Up | "Homo sapiens uroplakin 3B (UPK3B), transcript variant 2, mRNA."                                                                                                           |
| ILMN_1769615 | FLRT2     | 1.841878 | 9.18E-05 | 0.007815 | 5.746568 | Up | "Homo sapiens fibronectin leucine rich transmembrane protein 2 (FLRT2), mRNA."                                                                                             |
| ILMN_1797557 | PLEKHA6   | 1.986718 | 9.23E-05 | 0.007815 | 5.743237 | Up | "Homo sapiens pleckstrin homology domain containing, family A member 6 (PLEKHA6), mRNA."                                                                                   |
| ILMN_1802646 | EPHB6     | 1.421191 | 9.38E-05 | 0.007923 | 5.733369 | Up | "Homo sapiens EPH receptor B6 (EPHB6), mRNA."                                                                                                                              |
| ILMN_1705258 | CPZ       | 1.77059  | 0.000101 | 0.00836  | 5.689182 | Up | "Homo sapiens carboxypeptidase Z (CPZ), transcript variant 1, mRNA."                                                                                                       |
| ILMN_1749466 | VAT1L     | 2.121328 | 0.000101 | 0.00841  | 5.68322  | Up | "Homo sapiens vesicle amine transport protein 1 homolog (T. californica)-like (VAT1L), mRNA."                                                                              |
| ILMN_1694767 | LOC652688 | 2.474429 | 0.000103 | 0.008494 | 5.67273  | Up | "PREDICTED: Homo sapiens similar to Zinc finger protein basoonin-1 (LOC652688), mRNA."                                                                                     |
| ILMN_2108735 | EEF1A2    | 2.042384 | 0.000103 | 0.008494 | 5.671747 | Up | "Homo sapiens eukaryotic translation elongation factor 1 alpha 2 (EEF1A2), mRNA."                                                                                          |
| ILMN_1785900 | LOC653108 | 1.636326 | 0.000104 | 0.008494 | 5.670695 | Up | "PREDICTED: Homo sapiens similar to coxsackie virus and adenovirus receptor precursor (LOC653108), mRNA."                                                                  |
| ILMN_2337923 | TPD52L1   | 1.275569 | 0.000108 | 0.008712 | 5.645633 | Up | "Homo sapiens tumor protein D52-like 1 (TPD52L1), transcript variant 4, mRNA."                                                                                             |
| ILMN_1701933 | SNCA      | 1.669612 | 0.00011  | 0.00886  | 5.631796 | Up | "Homo sapiens synuclein, alpha (non A4 component of amyloid precursor) (SNCA), transcript variant NACP112, mRNA."                                                          |
| ILMN_1801090 | KRT222    | 1.473982 | 0.000111 | 0.008898 | 5.628033 | Up | "Homo sapiens keratin 222 (KRT222), mRNA."                                                                                                                                 |

|              |              |          |          |          |          |    |                                                                                                                                                                    |
|--------------|--------------|----------|----------|----------|----------|----|--------------------------------------------------------------------------------------------------------------------------------------------------------------------|
| ILMN_2139970 | ALDH1A3      | 1.378743 | 0.000111 | 0.008914 | 5.624748 | Up | "Homo sapiens aldehyde dehydrogenase 1 family, member A3 (ALDH1A3), mRNA."                                                                                         |
| ILMN_1812070 | ABCB1        | 1.995204 | 0.000114 | 0.009045 | 5.609184 | Up | "Homo sapiens ATP-binding cassette, sub-family B (MDR/TAP), member 1 (ABCB1), mRNA."                                                                               |
| ILMN_2150802 | FLJ22795     | 1.546255 | 0.000119 | 0.009319 | 5.585122 | Up | "Homo sapiens hypothetical protein FLJ22795 (FLJ22795), mRNA."                                                                                                     |
| ILMN_1658619 | WWC1         | 1.600551 | 0.000124 | 0.009587 | 5.558157 | Up | "Homo sapiens WW and C2 domain containing 1 (WWC1), mRNA."                                                                                                         |
| ILMN_2407879 | SORBS2       | 1.687453 | 0.000131 | 0.009981 | 5.520787 | Up | "Homo sapiens sorbin and SH3 domain containing 2 (SORBS2), transcript variant 1, mRNA."                                                                            |
| ILMN_1805561 | SLC14A1      | 1.961273 | 0.000141 | 0.01046  | 5.477157 | Up | "Homo sapiens solute carrier family 14 (urea transporter), member 1 (Kidd blood group) (SLC14A1), mRNA."                                                           |
| ILMN_3272441 | LOC100129165 | 1.703302 | 0.000141 | 0.01046  | 5.476915 | Up | "PREDICTED: Homo sapiens similar to Phosphatidylinositol phosphatase PTPRQ precursor (Receptor-type tyrosine-protein phosphatase Q) (PTPRQ) (LOC100129165), mRNA." |
| ILMN_1734897 | SLC4A4       | 1.644504 | 0.000143 | 0.010547 | 5.466809 | Up | "Homo sapiens solute carrier family 4, sodium bicarbonate cotransporter, member 4 (SLC4A4), transcript variant 2, mRNA."                                           |
| ILMN_3179038 | LOC100127909 | 1.725405 | 0.000145 | 0.010561 | 5.461037 | Up | "PREDICTED: Homo sapiens hypothetical protein LOC100127909 (LOC100127909), mRNA."                                                                                  |
| ILMN_3244876 | LOC100133171 | 1.683527 | 0.000146 | 0.010583 | 5.456039 | Up | "PREDICTED: Homo sapiens hypothetical protein LOC100133171 (LOC100133171), mRNA."                                                                                  |
| ILMN_1736911 | TMOD1        | 1.304559 | 0.000151 | 0.010859 | 5.436326 | Up | "Homo sapiens tropomodulin 1 (TMOD1), mRNA."                                                                                                                       |
| ILMN_1651900 | KCNA4        | 1.354147 | 0.000152 | 0.010901 | 5.432192 | Up | "Homo sapiens potassium voltage-gated channel, shaker-related subfamily, member 4 (KCNA4), mRNA."                                                                  |
| ILMN_1748827 | LOC388564    | 1.412375 | 0.000152 | 0.010901 | 5.432    | Up | "PREDICTED: Homo sapiens hypothetical gene supported by BC052596 (LOC388564), mRNA."                                                                               |
| ILMN_1679464 | BNC1         | 2.133631 | 0.000152 | 0.010926 | 5.429688 | Up | "Homo sapiens basoonin 1 (BNC1), mRNA."                                                                                                                            |
| ILMN_1707925 | ABHD12B      | 1.473699 | 0.000153 | 0.010937 | 5.426921 | Up | "Homo sapiens abhydrolase domain containing 12B (ABHD12B), transcript variant 2, mRNA."                                                                            |
| ILMN_1779547 | HPSE         | 1.312435 | 0.000156 | 0.01102  | 5.415965 | Up | "Homo sapiens heparanase (HPSE), mRNA."                                                                                                                            |
| ILMN_1790098 | OGN          | 2.562591 | 0.00016  | 0.011221 | 5.400226 | Up | "Homo sapiens osteoglycin (OGN), transcript variant 3, mRNA."                                                                                                      |
| ILMN_1799028 | TSPAN5       | 1.830892 | 0.000161 | 0.011302 | 5.393016 | Up | "Homo sapiens tetraspanin 5 (TSPAN5), mRNA."                                                                                                                       |
| ILMN_2205470 | FAM153B      | 1.748845 | 0.000162 | 0.011302 | 5.391171 | Up | "Homo sapiens family with sequence similarity 153, member B (FAM153B), mRNA."                                                                                      |
| ILMN_1804604 | C1QTNF3      | 1.27695  | 0.000162 | 0.011304 | 5.389574 | Up | "Homo sapiens C1q and tumor necrosis factor related protein 3 (C1QTNF3), transcript variant 2, mRNA."                                                              |
| ILMN_1866954 | HS.71947     | 1.358086 | 0.00017  | 0.01167  | 5.360326 | Up | "Homo sapiens mRNA full length insert cDNA clone EUROIMAGE 994183"                                                                                                 |
| ILMN_1736692 | SRL          | 1.24493  | 0.00017  | 0.01167  | 5.359791 | Up | "Homo sapiens sarcalumenin (SRL), mRNA."                                                                                                                           |
| ILMN_1654598 | IQCA1        | 1.36477  | 0.000174 | 0.011813 | 5.346916 | Up | "Homo sapiens IQ motif containing with AAA domain 1 (IQCA1), mRNA."                                                                                                |
| ILMN_2315789 | PTPRD        | 1.507394 | 0.000176 | 0.011856 | 5.339446 | Up | "Homo sapiens protein tyrosine phosphatase, receptor type, D (PTPRD), transcript variant 2, mRNA."                                                                 |
| ILMN_1716407 | SORBS2       | 1.703559 | 0.000176 | 0.011856 | 5.338553 | Up | "Homo sapiens sorbin and SH3 domain containing 2 (SORBS2), transcript variant 1, mRNA."                                                                            |
| ILMN_1807439 | ALDH1A3      | 1.445656 | 0.000181 | 0.012099 | 5.321776 | Up | "Homo sapiens aldehyde dehydrogenase 1 family, member A3 (ALDH1A3), mRNA."                                                                                         |
| ILMN_1655949 | LOC653107    | 1.785914 | 0.000183 | 0.012176 | 5.316155 | Up | "PREDICTED: Homo sapiens similar to Annexin A8 (Annexin VIII) (Vascular anticoagulant-beta) (VAC-beta), transcript variant 5 (LOC653107), mRNA."                   |
| ILMN_1912619 | HS.568058    | 1.661667 | 0.000185 | 0.012294 | 5.30799  | Up | "full-length cDNA clone CS0DF032YD19 of Fetal brain of Homo sapiens (human)"                                                                                       |
| ILMN_3240901 | ZBTB7C       | 1.34328  | 0.000192 | 0.012616 | 5.287558 | Up | "Homo sapiens zinc finger and BTB domain containing 7C (ZBTB7C), mRNA."                                                                                            |
| ILMN_1723969 | PLCB1        | 1.305088 | 0.000194 | 0.012683 | 5.280362 | Up | "Homo sapiens phospholipase C, beta 1 (phosphoinositide-specific) (PLCB1), transcript variant 1, mRNA."                                                            |
| ILMN_1776151 | OLFML1       | 1.349829 | 0.000196 | 0.012774 | 5.273223 | Up | "Homo sapiens olfactomedin-like 1 (OLFML1), mRNA."                                                                                                                 |
| ILMN_1667169 | LOC440349    | 1.69436  | 0.000197 | 0.012796 | 5.270496 | Up | "PREDICTED: Homo sapiens similar to nuclear pore complex interacting protein, transcript variant 2 (LOC440349), mRNA."                                             |

|              |          |          |          |          |          |    |                                                                                                                                             |
|--------------|----------|----------|----------|----------|----------|----|---------------------------------------------------------------------------------------------------------------------------------------------|
| ILMN_2406299 | SEMA3B   | 1.498463 | 0.000198 | 0.012829 | 5.266384 | Up | "Homo sapiens sema domain, immunoglobulin domain (Ig), short basic domain, secreted, (semaphorin) 3B (SEMA3B), transcript variant 2, mRNA." |
| ILMN_1678095 | SMPDL3B  | 1.308765 | 0.000206 | 0.013139 | 5.24353  | Up | "Homo sapiens sphingomyelin phosphodiesterase, acid-like 3B (SMPDL3B), transcript variant 1, mRNA."                                         |
| ILMN_1661491 | SH3GL2   | 1.664493 | 0.000207 | 0.013158 | 5.240231 | Up | "Homo sapiens SH3-domain GRB2-like 2 (SH3GL2), mRNA."                                                                                       |
| ILMN_1653501 | SEMA3B   | 1.403151 | 0.00021  | 0.013275 | 5.232393 | Up | "Homo sapiens sema domain, immunoglobulin domain (Ig), short basic domain, secreted, (semaphorin) 3B (SEMA3B), transcript variant 2, mRNA." |
| ILMN_1701700 | KLHL4    | 1.530223 | 0.000212 | 0.013344 | 5.226844 | Up | "Homo sapiens kelch-like 4 (Drosophila) (KLHL4), transcript variant 1, mRNA."                                                               |
| ILMN_1725193 | IGFBP2   | 1.543893 | 0.000217 | 0.013552 | 5.213349 | Up | "Homo sapiens insulin-like growth factor binding protein 2, 36kDa (IGFBP2), mRNA."                                                          |
| ILMN_1674367 | SPRR2F   | 1.813995 | 0.000223 | 0.013862 | 5.194829 | Up | "Homo sapiens small proline-rich protein 2F (SPRR2F), mRNA."                                                                                |
| ILMN_1714383 | TPD52L1  | 1.261852 | 0.000226 | 0.013939 | 5.188272 | Up | "Homo sapiens tumor protein D52-like 1 (TPD52L1), transcript variant 3, mRNA."                                                              |
| ILMN_1692535 | DPP4     | 1.38184  | 0.000233 | 0.014254 | 5.167699 | Up | "Homo sapiens dipeptidyl-peptidase 4 (DPP4), mRNA."                                                                                         |
| ILMN_1755721 | FAM63A   | 1.558775 | 0.000237 | 0.014392 | 5.158205 | Up | "Homo sapiens family with sequence similarity 63, member A (FAM63A), transcript variant 1, mRNA."                                           |
| ILMN_1725139 | CA9      | 1.732906 | 0.000244 | 0.014728 | 5.140906 | Up | "Homo sapiens carbonic anhydrase IX (CA9), mRNA."                                                                                           |
| ILMN_1687213 | C8ORF13  | 1.991951 | 0.000254 | 0.015119 | 5.116705 | Up | "Homo sapiens chromosome 8 open reading frame 13 (C8orf13), mRNA."                                                                          |
| ILMN_1741014 | SLC28A3  | 1.491067 | 0.000264 | 0.015441 | 5.092757 | Up | "Homo sapiens solute carrier family 28 (sodium-coupled nucleoside transporter), member 3 (SLC28A3), mRNA."                                  |
| ILMN_1704353 | IGSF3    | 1.29506  | 0.000265 | 0.015447 | 5.091062 | Up | "Homo sapiens immunoglobulin superfamily, member 3 (IGSF3), transcript variant 1, mRNA."                                                    |
| ILMN_1700248 | WDR86    | 1.419424 | 0.000267 | 0.015471 | 5.087159 | Up | "Homo sapiens WD repeat domain 86 (WDR86), mRNA."                                                                                           |
| ILMN_1720511 | LRRN1    | 1.264958 | 0.000277 | 0.015973 | 5.063562 | Up | "Homo sapiens leucine rich repeat neuronal 1 (LRRN1), mRNA."                                                                                |
| ILMN_1709674 | GFPT2    | 1.621471 | 0.000284 | 0.016157 | 5.050281 | Up | "Homo sapiens glutamine-fructose-6-phosphate transaminase 2 (GFPT2), mRNA."                                                                 |
| ILMN_2197128 | OSR1     | 2.308353 | 0.000284 | 0.016157 | 5.048689 | Up | "Homo sapiens odd-skipped related 1 (Drosophila) (OSR1), mRNA."                                                                             |
| ILMN_1721541 | WIF1     | 3.073334 | 0.000285 | 0.016157 | 5.047279 | Up | "Homo sapiens WNT inhibitory factor 1 (WIF1), mRNA."                                                                                        |
| ILMN_1671318 | FRAS1    | 1.980915 | 0.000286 | 0.016194 | 5.044504 | Up | "Homo sapiens Fraser syndrome 1 (FRAS1), transcript variant 2, mRNA."                                                                       |
| ILMN_1654966 | SCARA3   | 1.599718 | 0.000292 | 0.016384 | 5.032542 | Up | "Homo sapiens scavenger receptor class A, member 3 (SCARA3), transcript variant 2, mRNA."                                                   |
| ILMN_1710553 | TMEM151A | 1.805513 | 0.000297 | 0.016584 | 5.022446 | Up | "Homo sapiens transmembrane protein 151A (TMEM151A), mRNA."                                                                                 |
| ILMN_1771126 | RORC     | 1.807382 | 0.000303 | 0.016796 | 5.009953 | Up | "Homo sapiens RAR-related orphan receptor C (RORC), transcript variant 2, mRNA."                                                            |
| ILMN_2402600 | GLIS3    | 1.347697 | 0.000305 | 0.016881 | 5.006232 | Up | "Homo sapiens GLIS family zinc finger 3 (GLIS3), transcript variant 2, mRNA."                                                               |
| ILMN_2387105 | OGN      | 2.73285  | 0.000327 | 0.017556 | 4.965867 | Up | "Homo sapiens osteoglycin (OGN), transcript variant 3, mRNA."                                                                               |
| ILMN_2234697 | BEX1     | 1.431468 | 0.000327 | 0.017556 | 4.9657   | Up | "Homo sapiens brain expressed, X-linked 1 (BEX1), mRNA."                                                                                    |
| ILMN_1663042 | SDC4     | 1.271488 | 0.000327 | 0.017562 | 4.964802 | Up | "Homo sapiens syndecan 4 (SDC4), mRNA."                                                                                                     |
| ILMN_1735762 | NPNT     | 1.339389 | 0.000329 | 0.017654 | 4.961023 | Up | "Homo sapiens nephronectin (NPNT), mRNA."                                                                                                   |
| ILMN_1740842 | SALL2    | 1.420263 | 0.000331 | 0.017703 | 4.958093 | Up | "Homo sapiens sal-like 2 (Drosophila) (SALL2), mRNA."                                                                                       |
| ILMN_1758392 | ANKS1B   | 1.251145 | 0.000332 | 0.017711 | 4.956402 | Up | "Homo sapiens ankyrin repeat and sterile alpha motif domain containing 1B (ANKS1B), transcript variant 2, mRNA."                            |
| ILMN_2151114 | VSNL1    | 1.274454 | 0.000343 | 0.017931 | 4.937147 | Up | "Homo sapiens visinin-like 1 (VSNL1), mRNA."                                                                                                |
| ILMN_1749379 | GALNT9   | 1.428648 | 0.00035  | 0.018155 | 4.925185 | Up | "Homo sapiens UDP-N-acetyl-alpha-D-galactosamine:polypeptide N-acetylgalactosaminyltransferase 9 (GalNAc-T9) (GALNT9), mRNA."               |
| ILMN_1749636 | DNAJC22  | 2.01399  | 0.00037  | 0.01889  | 4.892675 | Up | "Homo sapiens DnaJ (Hsp40) homolog, subfamily C, member 22 (DNAJC22), mRNA."                                                                |

|              |              |          |          |          |          |    |                                                                                                                                                                                                                                                    |
|--------------|--------------|----------|----------|----------|----------|----|----------------------------------------------------------------------------------------------------------------------------------------------------------------------------------------------------------------------------------------------------|
| ILMN_1730291 | ATP1B1       | 1.534974 | 0.000374 | 0.018968 | 4.886476 | Up | "Homo sapiens ATPase, Na <sup>+</sup> /K <sup>+</sup> transporting, beta 1 polypeptide (ATP1B1), transcript variant 1, mRNA."<br>"Homo sapiens synuclein, alpha (non A4 component of amyloid precursor) (SNCA), transcript variant NACP140, mRNA." |
| ILMN_1766165 | SNCA         | 1.420587 | 0.000376 | 0.019072 | 4.882529 | Up | "Homo sapiens uroplakin 3B (UPK3B), transcript variant 1, mRNA."                                                                                                                                                                                   |
| ILMN_1706441 | UPK3B        | 4.110486 | 0.000377 | 0.019089 | 4.880553 | Up | "Homo sapiens prolyl 4-hydroxylase, alpha polypeptide II (P4HA2), transcript variant 2, mRNA."                                                                                                                                                     |
| ILMN_1795778 | P4HA2        | 1.26851  | 0.000385 | 0.019243 | 4.868946 | Up | "Homo sapiens glycosyltransferase 8 domain containing 2 (GLT8D2), mRNA."                                                                                                                                                                           |
| ILMN_1802654 | GLT8D2       | 1.594107 | 0.000385 | 0.019243 | 4.868941 | Up | "Homo sapiens spar/osteonectin, cwcv and kazal-like domains proteoglycan (testican) 2 (SPOCK2), mRNA."                                                                                                                                             |
| ILMN_1656287 | SPOCK2       | 1.681296 | 0.000411 | 0.020037 | 4.829864 | Up | "Homo sapiens transglutaminase 2 (C polypeptide, protein-glutamine-gamma-glutamyltransferase) (TGM2), transcript variant 1, mRNA."                                                                                                                 |
| ILMN_1705750 | TGM2         | 1.257944 | 0.000413 | 0.020097 | 4.827494 | Up | "Homo sapiens transmembrane protease, serine 3 (TMPRSS3), transcript variant D, mRNA."                                                                                                                                                             |
| ILMN_1741768 | TMPRSS3      | 1.352668 | 0.000435 | 0.020845 | 4.796282 | Up | "Homo sapiens Fas apoptotic inhibitory molecule 3 (FAIM3), mRNA."                                                                                                                                                                                  |
| ILMN_1775542 | FAIM3        | 1.265841 | 0.000439 | 0.020956 | 4.790808 | Up | "Homo sapiens IGF-like family member 2 (IGFL2), mRNA."                                                                                                                                                                                             |
| ILMN_1790227 | IGFL2        | 1.93123  | 0.00046  | 0.021635 | 4.764347 | Up | "Homo sapiens cerebellin 2 precursor (CBLN2), mRNA."                                                                                                                                                                                               |
| ILMN_1796069 | CBLN2        | 1.684904 | 0.000481 | 0.022352 | 4.73801  | Up | "Homo sapiens sciellin (SCEL), transcript variant 1, mRNA."                                                                                                                                                                                        |
| ILMN_2388190 | SCEL         | 1.329085 | 0.000501 | 0.023039 | 4.714057 | Up | "Homo sapiens potassium channel tetramerisation domain containing 14 (KCTD14), mRNA."                                                                                                                                                              |
| ILMN_1731044 | KCTD14       | 1.715081 | 0.000506 | 0.023153 | 4.708713 | Up | "Homo sapiens growth arrest-specific 1 (GAS1), mRNA."                                                                                                                                                                                              |
| ILMN_2062701 | GAS1         | 1.478719 | 0.000506 | 0.023153 | 4.707771 | Up | "Homo sapiens CUB domain containing protein 1 (CDCP1), transcript variant 1, mRNA."                                                                                                                                                                |
| ILMN_1724941 | CDCP1        | 1.338214 | 0.00052  | 0.023478 | 4.691821 | Up | "Homo sapiens chromosome 13 open reading frame 33 (C13orf33), mRNA."                                                                                                                                                                               |
| ILMN_1696048 | C13ORF33     | 1.307729 | 0.000531 | 0.023743 | 4.680319 | Up | "Homo sapiens cytidine monophosphate-N-acetylneuraminic acid hydroxylase (CMP-N-acetylneuraminic acid hydroxylase) pseudogene (CMAH), transcript variant 1, non-coding RNA."                                                                       |
| ILMN_1704084 | CMAH         | 1.613324 | 0.000534 | 0.02384  | 4.677391 | Up | "Homo sapiens prostaglandin F2 receptor negative regulator (PTGFRN), mRNA."                                                                                                                                                                        |
| ILMN_2077905 | PTGFRN       | 1.549865 | 0.000544 | 0.02412  | 4.666526 | Up | "Homo sapiens contactin associated protein-like 2 (CNTNAP2), mRNA."                                                                                                                                                                                |
| ILMN_1690223 | CNTNAP2      | 1.479376 | 0.000547 | 0.024168 | 4.662895 | Up | "PREDICTED: Homo sapiens similar to complement component C3 (LOC100133511), partial mRNA."                                                                                                                                                         |
| ILMN_3240308 | LOC100133511 | 2.652644 | 0.00057  | 0.024903 | 4.638502 | Up | "Homo sapiens immunoglobulin superfamily, member 1 (IGSF1), transcript variant 1, mRNA."                                                                                                                                                           |
| ILMN_1679299 | IGSF1        | 1.402305 | 0.000597 | 0.025669 | 4.612189 | Up | "Homo sapiens UDP-N-acetyl-alpha-D-galactosamine:polypeptide N-acetylgalactosaminyltransferase 9 (GalNAc-T9) (GALNT9), mRNA."                                                                                                                      |
| ILMN_1708925 | GALNT9       | 1.408445 | 0.000597 | 0.025669 | 4.611931 | Up | "Homo sapiens haptoglobin (HP), mRNA."                                                                                                                                                                                                             |
| ILMN_1812433 | HP           | 3.128971 | 0.000608 | 0.025913 | 4.601911 | Up | "Homo sapiens carboxypeptidase B1 (tissue) (CPB1), mRNA."                                                                                                                                                                                          |
| ILMN_1685174 | CPB1         | 1.45012  | 0.000611 | 0.025964 | 4.599044 | Up | "PREDICTED: Homo sapiens similar to Phosphatidylinositol phosphatase PTPRQ precursor (Receptor-type tyrosine-protein phosphatase Q) (PTPRQ) (LOC100129165), mRNA."                                                                                 |
| ILMN_3191541 | LOC100129165 | 1.626132 | 0.000631 | 0.026429 | 4.580026 | Up | "Homo sapiens tandem C2 domains, nuclear (TC2N), mRNA."                                                                                                                                                                                            |
| ILMN_1734596 | TC2N         | 1.24525  | 0.000638 | 0.026619 | 4.573857 | Up | "Homo sapiens transmembrane protein 151A (TMEM151A), mRNA."                                                                                                                                                                                        |
| ILMN_1709659 | TMEM151A     | 1.566546 | 0.000655 | 0.027145 | 4.558509 | Up | "Homo sapiens fibroblast growth factor receptor 3 (achondroplasia, thanatophoric dwarfism) (FGFR3), transcript variant 2, mRNA."                                                                                                                   |
| ILMN_1723123 | FGFR3        | 1.270128 | 0.000661 | 0.027315 | 4.553643 | Up | "Homo sapiens ras homolog gene family, member U (RHOU), mRNA."                                                                                                                                                                                     |
| ILMN_3242586 | RHOU         | 1.318308 | 0.000685 | 0.027883 | 4.53311  | Up | "PREDICTED: Homo sapiens similar to Ig gamma-3 chain C region, membrane-bound form (LOC652495), mRNA."                                                                                                                                             |
| ILMN_1722948 | LOC652495    | 1.635189 | 0.000721 | 0.028861 | 4.503656 | Up |                                                                                                                                                                                                                                                    |

|              |           |          |          |          |          |    |                                                                                                                                                                            |
|--------------|-----------|----------|----------|----------|----------|----|----------------------------------------------------------------------------------------------------------------------------------------------------------------------------|
| ILMN_1704985 | CYP27A1   | 1.248954 | 0.000738 | 0.029246 | 4.48968  | Up | "Homo sapiens cytochrome P450, family 27, subfamily A, polypeptide 1 (CYP27A1), nuclear gene encoding mitochondrial protein, mRNA."                                        |
| ILMN_1656927 | SEMA5A    | 1.354999 | 0.000739 | 0.029246 | 4.489549 | Up | "Homo sapiens sema domain, seven thrombospondin repeats (type 1 and type 1-like), transmembrane domain (TM) and short cytoplasmic domain, (semaphorin) 5A (SEMA5A), mRNA." |
| ILMN_2134974 | RAB38     | 1.86362  | 0.00075  | 0.029547 | 4.480814 | Up | "Homo sapiens RAB38, member RAS oncogene family (RAB38), mRNA."                                                                                                            |
| ILMN_1776395 | ARMC4     | 1.418816 | 0.000751 | 0.029547 | 4.480085 | Up | "Homo sapiens armadillo repeat containing 4 (ARMC4), mRNA."                                                                                                                |
| ILMN_1711888 | COBL      | 2.168283 | 0.000765 | 0.029862 | 4.469499 | Up | "Homo sapiens cordon-bleu homolog (mouse) (COBL), mRNA."                                                                                                                   |
| ILMN_1703572 | PCDH20    | 2.137662 | 0.000793 | 0.030595 | 4.449063 | Up | "Homo sapiens protocadherin 20 (PCDH20), mRNA."                                                                                                                            |
| ILMN_1874323 | HS.562504 | 1.307697 | 0.00081  | 0.030997 | 4.436377 | Up | "PM3-DT0037-231299-001-e06 DT0037 Homo sapiens cDNA, mRNA sequence"                                                                                                        |
| ILMN_1837428 | HS.25318  | 1.752801 | 0.000816 | 0.031129 | 4.432476 | Up | Homo sapiens clone 25194 mRNA sequence                                                                                                                                     |
| ILMN_1749324 | DPYS      | 2.035353 | 0.00083  | 0.031557 | 4.423028 | Up | "Homo sapiens dihydropyrimidinase (DPYS), mRNA."                                                                                                                           |
| ILMN_2299450 | P2RX2     | 1.263062 | 0.000845 | 0.031853 | 4.412226 | Up | "Homo sapiens purinergic receptor P2X, ligand-gated ion channel, 2 (P2RX2), transcript variant 1, mRNA."                                                                   |
| ILMN_1694588 | C4BPB     | 1.95841  | 0.000852 | 0.032017 | 4.407934 | Up | "Homo sapiens complement component 4 binding protein, beta (C4BPB), transcript variant 3, mRNA."                                                                           |
| ILMN_2094875 | ABCB1     | 1.746486 | 0.000853 | 0.032025 | 4.407337 | Up | "Homo sapiens ATP-binding cassette, sub-family B (MDR/TAP), member 1 (ABCB1), mRNA."                                                                                       |
| ILMN_2115991 | TNNT1     | 1.47691  | 0.000872 | 0.032409 | 4.394768 | Up | "Homo sapiens troponin T type 1 (skeletal, slow) (TNNT1), mRNA."                                                                                                           |
| ILMN_1704868 | LOC648570 | 1.292761 | 0.000877 | 0.032508 | 4.391172 | Up | "PREDICTED: Homo sapiens hypothetical protein LOC648570 (LOC648570), mRNA."                                                                                                |
| ILMN_1767113 | AOX1      | 1.551246 | 0.000893 | 0.032825 | 4.380757 | Up | "Homo sapiens aldehyde oxidase 1 (AOX1), mRNA."                                                                                                                            |
| ILMN_1705231 | SLCO2A1   | 1.741187 | 0.000918 | 0.033284 | 4.365411 | Up | "Homo sapiens solute carrier organic anion transporter family, member 2A1 (SLCO2A1), mRNA."                                                                                |
| ILMN_2139125 | LRFN5     | 1.336329 | 0.000933 | 0.033591 | 4.356272 | Up | "Homo sapiens leucine rich repeat and fibronectin type III domain containing 5 (LRFN5), mRNA."                                                                             |
| ILMN_2053345 | KCNT2     | 1.373097 | 0.000949 | 0.033847 | 4.346584 | Up | "Homo sapiens potassium channel, subfamily T, member 2 (KCNT2), mRNA."                                                                                                     |
| ILMN_2386973 | PKP2      | 1.476597 | 0.000955 | 0.033902 | 4.342672 | Up | "Homo sapiens plakophilin 2 (PKP2), transcript variant 2a, mRNA."                                                                                                          |
| ILMN_1677198 | C1R       | 1.322053 | 0.000956 | 0.033902 | 4.342044 | Up | "Homo sapiens complement component 1, r subcomponent (C1R), mRNA."                                                                                                         |
| ILMN_2096784 | TFAP2C    | 1.391506 | 0.001    | 0.034782 | 4.316566 | Up | "Homo sapiens transcription factor AP-2 gamma (activating enhancer binding protein 2 gamma) (TFAP2C), mRNA."                                                               |
| ILMN_2124241 | MUM1L1    | 1.407985 | 0.001021 | 0.035212 | 4.305039 | Up | "Homo sapiens melanoma associated antigen (mutated) 1-like 1 (MUM1L1), mRNA."                                                                                              |
| ILMN_1740269 | WNT2B     | 2.117437 | 0.001027 | 0.035307 | 4.30187  | Up | "Homo sapiens wingless-type MMTV integration site family, member 2B (WNT2B), transcript variant WNT-2B2, mRNA."                                                            |
| ILMN_1743130 | PTGFRN    | 1.566121 | 0.001037 | 0.03547  | 4.296202 | Up | "Homo sapiens prostaglandin F2 receptor negative regulator (PTGFRN), mRNA."                                                                                                |
| ILMN_1750678 | TIMD4     | 3.497012 | 0.00104  | 0.035493 | 4.294802 | Up | "Homo sapiens T-cell immunoglobulin and mucin domain containing 4 (TIMD4), mRNA."                                                                                          |
| ILMN_1696590 | CHST4     | 1.773436 | 0.001049 | 0.035727 | 4.289443 | Up | "Homo sapiens carbohydrate (N-acetylglucosamine 6-O) sulfotransferase 4 (CHST4), mRNA."                                                                                    |
| ILMN_1792682 | MCTP2     | 1.298758 | 0.001059 | 0.035825 | 4.284257 | Up | "Homo sapiens multiple C2 domains, transmembrane 2 (MCTP2), mRNA."                                                                                                         |
| ILMN_1769911 | SLC38A1   | 1.589394 | 0.00107  | 0.035985 | 4.278507 | Up | "Homo sapiens solute carrier family 38, member 1 (SLC38A1), transcript variant 1, mRNA."                                                                                   |
| ILMN_1710740 | C2        | 1.554703 | 0.001098 | 0.036451 | 4.263656 | Up | "Homo sapiens complement component 2 (C2), mRNA."                                                                                                                          |
| ILMN_1740717 | ADH1C     | 1.249423 | 0.001153 | 0.037422 | 4.236413 | Up | "Homo sapiens alcohol dehydrogenase 1C (class I), gamma polypeptide (ADH1C), mRNA."                                                                                        |
| ILMN_1660114 | MMRN1     | 2.848493 | 0.001187 | 0.038099 | 4.219679 | Up | "Homo sapiens multimerin 1 (MMRN1), mRNA."                                                                                                                                 |
| ILMN_1685540 | SHRM      | 1.464773 | 0.001222 | 0.038746 | 4.203502 | Up | "Homo sapiens shroom (SHRM), mRNA."                                                                                                                                        |
| ILMN_1746376 | SCARA3    | 1.447807 | 0.001287 | 0.039662 | 4.174294 | Up | "Homo sapiens scavenger receptor class A, member 3 (SCARA3), transcript variant 2, mRNA."                                                                                  |
| ILMN_3242174 | LOC652900 | 1.274115 | 0.001463 | 0.042718 | 4.102546 | Up | "PREDICTED: Homo sapiens similar to SEZ6L2 protein (LOC652900), mRNA."                                                                                                     |

|              |           |          |          |          |          |      |                                                                                                                               |
|--------------|-----------|----------|----------|----------|----------|------|-------------------------------------------------------------------------------------------------------------------------------|
| ILMN_1695299 | PDLIM3    | 1.729421 | 0.001716 | 0.047074 | 4.013762 | Up   | "Homo sapiens PDZ and LIM domain 3 (PDLIM3), mRNA."                                                                           |
| ILMN_2230025 | PDLIM3    | 1.74178  | 0.001787 | 0.048243 | 3.991173 | Up   | "Homo sapiens PDZ and LIM domain 3 (PDLIM3), mRNA."                                                                           |
| ILMN_1740996 | CA3       | 2.347984 | 0.001808 | 0.048358 | 3.984823 | Up   | "Homo sapiens carbonic anhydrase III, muscle specific (CA3), mRNA."                                                           |
| ILMN_1785570 | SUSD3     | 1.321221 | 0.001894 | 0.049692 | 3.958893 | Up   | "Homo sapiens sushi domain containing 3 (SUSD3), mRNA."                                                                       |
| ILMN_1757736 | IRX5      | -2.98534 | 6.18E-13 | 9.75E-09 | -31.6297 | Down | "Homo sapiens iroquois homeobox 5 (IRX5), mRNA."                                                                              |
| ILMN_1718285 | HOXC8     | -4.66097 | 8.9E-13  | 1.05E-08 | -30.6717 | Down | "Homo sapiens homeobox C8 (HOXC8), mRNA."                                                                                     |
| ILMN_1671800 | LOC643911 | -3.76911 | 2.59E-11 | 2.01E-07 | -23.0604 | Down | "PREDICTED: Homo sapiens hypothetical LOC643911 (LOC643911), mRNA."                                                           |
| ILMN_3250268 | LOC643911 | -2.94473 | 3.36E-11 | 2.01E-07 | -22.5585 | Down | "PREDICTED: Homo sapiens hCG1815491 (LOC643911), miscRNA."                                                                    |
| ILMN_2140559 | IRX5      | -2.2691  | 5.94E-11 | 2.96E-07 | -21.4878 | Down | "Homo sapiens iroquois homeobox protein 5 (IRX5), mRNA."                                                                      |
| ILMN_1721580 | TBX15     | -3.45121 | 1.27E-10 | 4.99E-07 | -20.1452 | Down | "Homo sapiens T-box 15 (TBX15), mRNA."                                                                                        |
| ILMN_1718898 | HOXC9     | -2.96904 | 1.47E-10 | 5.34E-07 | -19.8853 | Down | "Homo sapiens homeobox C9 (HOXC9), mRNA."                                                                                     |
| ILMN_2230117 | AVP       | -2.47202 | 1.58E-10 | 5.34E-07 | -19.7649 | Down | "Homo sapiens arginine vasopressin (neurophysin II, antidiuretic hormone, diabetes insipidus, neurohypophyseal) (AVP), mRNA." |
| ILMN_2198413 | MYEOV     | -2.88849 | 4.19E-09 | 7.34E-06 | -14.8889 | Down | "Homo sapiens myeloma overexpressed (in a subset of t(11;14) positive multiple myelomas) (MYEOV), mRNA."                      |
| ILMN_1687220 | DMRT3     | -1.70565 | 9.16E-09 | 1.16E-05 | -13.9009 | Down | "Homo sapiens doublesex and mab-3 related transcription factor 3 (DMRT3), mRNA."                                              |
| ILMN_1739582 | HOXA9     | -2.37001 | 9.98E-09 | 1.16E-05 | -13.7968 | Down | "Homo sapiens homeobox A9 (HOXA9), mRNA."                                                                                     |
| ILMN_1722809 | NRCAM     | -3.29045 | 1.44E-08 | 1.55E-05 | -13.3529 | Down | "Homo sapiens neuronal cell adhesion molecule (NRCAM), transcript variant 2, mRNA."                                           |
| ILMN_1735124 | OXT       | -2.3634  | 1.58E-08 | 1.63E-05 | -13.246  | Down | "Homo sapiens oxytocin, prepropeptide (OXT), mRNA."                                                                           |
| ILMN_1688480 | CCND1     | -1.81127 | 2.01E-08 | 1.98E-05 | -12.9707 | Down | "Homo sapiens cyclin D1 (CCND1), mRNA."                                                                                       |
| ILMN_1794492 | HOXC6     | -1.50453 | 4.38E-08 | 3.57E-05 | -12.0976 | Down | "Homo sapiens homeobox C6 (HOXC6), transcript variant 1, mRNA."                                                               |
| ILMN_1811468 | IRX3      | -2.91204 | 5.66E-08 | 4.3E-05  | -11.8229 | Down | "Homo sapiens iroquois homeobox 3 (IRX3), mRNA."                                                                              |
| ILMN_1904578 | HS.537002 | -1.95259 | 6.36E-08 | 4.63E-05 | -11.6996 | Down | Homo sapiens cDNA clone IMAGE:4811759                                                                                         |
| ILMN_1782412 | IRX2      | -2.83129 | 6.49E-08 | 4.66E-05 | -11.6776 | Down | "Homo sapiens iroquois homeobox 2 (IRX2), mRNA."                                                                              |
| ILMN_2411236 | NRCAM     | -3.7395  | 7.02E-08 | 4.89E-05 | -11.5957 | Down | "Homo sapiens neuronal cell adhesion molecule (NRCAM), transcript variant 2, mRNA."                                           |
| ILMN_1678191 | GDF10     | -2.66863 | 2.15E-07 | 0.000113 | -10.4763 | Down | "Homo sapiens growth differentiation factor 10 (GDF10), mRNA."                                                                |
| ILMN_1716309 | EGFL6     | -4.53026 | 2.3E-07  | 0.000119 | -10.4108 | Down | "Homo sapiens EGF-like-domain, multiple 6 (EGFL6), mRNA."                                                                     |
| ILMN_1715684 | LAMB3     | -2.69733 | 2.49E-07 | 0.000124 | -10.3323 | Down | "Homo sapiens laminin, beta 3 (LAMB3), transcript variant 1, mRNA."                                                           |
| ILMN_1710544 | PCDH7     | -1.69014 | 3.84E-07 | 0.000175 | -9.92906 | Down | "Homo sapiens protocadherin 7 (PCDH7), transcript variant a, mRNA."                                                           |
| ILMN_1807925 | GNG2      | -0.96213 | 4.96E-07 | 0.000217 | -9.69551 | Down | "Homo sapiens guanine nucleotide binding protein (G protein), gamma 2 (GNG2), mRNA."                                          |
| ILMN_1739496 | PRRX1     | -1.16402 | 5.26E-07 | 0.000228 | -9.64389 | Down | "Homo sapiens paired related homeobox 1 (PRRX1), transcript variant pmx-1a, mRNA."                                            |
| ILMN_1812702 | SIX1      | -2.12845 | 5.29E-07 | 0.000228 | -9.63794 | Down | "Homo sapiens SIX homeobox 1 (SIX1), mRNA."                                                                                   |
| ILMN_1753789 | TNN       | -1.46013 | 5.37E-07 | 0.000229 | -9.62418 | Down | "Homo sapiens tenascin N (TNN), mRNA."                                                                                        |
| ILMN_1790810 | HCN4      | -0.86295 | 6.47E-07 | 0.00026  | -9.45809 | Down | "Homo sapiens hyperpolarization activated cyclic nucleotide-gated potassium channel 4 (HCN4), mRNA."                          |
| ILMN_1782558 | XG        | -2.46833 | 6.49E-07 | 0.00026  | -9.45563 | Down | "Homo sapiens Xg blood group (XG), mRNA."                                                                                     |
| ILMN_1806862 | FLJ35282  | -1.85292 | 1.18E-06 | 0.000389 | -8.94157 | Down | "PREDICTED: Homo sapiens similar to mariner transposase (FLJ35282), mRNA."                                                    |
| ILMN_2204576 | HSD17B13  | -2.32345 | 1.28E-06 | 0.000413 | -8.87267 | Down | "Homo sapiens hydroxysteroid (17-beta) dehydrogenase 13 (HSD17B13), mRNA."                                                    |
| ILMN_1731862 | ITIH5     | -1.73013 | 1.39E-06 | 0.000439 | -8.80212 | Down | "Homo sapiens inter-alpha (globulin) inhibitor H5 (ITIH5), transcript variant 1, mRNA."                                       |

|              |              |          |          |          |          |      |                                                                                                                   |
|--------------|--------------|----------|----------|----------|----------|------|-------------------------------------------------------------------------------------------------------------------|
| ILMN_1768940 | COL15A1      | -1.07886 | 1.71E-06 | 0.000528 | -8.62968 | Down | "Homo sapiens collagen, type XV, alpha 1 (COL15A1), mRNA."                                                        |
| ILMN_1697460 | REEP6        | -1.80703 | 1.88E-06 | 0.000559 | -8.55043 | Down | "Homo sapiens receptor accessory protein 6 (REEP6), mRNA."                                                        |
| ILMN_3239031 | SYNC         | -0.89577 | 2E-06    | 0.00058  | -8.49811 | Down | "Homo sapiens syncoilin, intermediate filament protein (SYNC), transcript variant 1, mRNA."                       |
| ILMN_1709153 | PRR16        | -0.94468 | 2.17E-06 | 0.0006   | -8.4347  | Down | "Homo sapiens proline rich 16 (PRR16), mRNA."                                                                     |
| ILMN_1776888 | RHOXF1       | -1.47514 | 2.32E-06 | 0.000631 | -8.37862 | Down | "Homo sapiens RhoX homeobox family, member 1 (RHOXF1), mRNA."                                                     |
| ILMN_1759910 | SERPINA5     | -2.25342 | 2.82E-06 | 0.000738 | -8.2215  | Down | "Homo sapiens serpin peptidase inhibitor, clade A (alpha-1 antitrypsin, antitrypsin), member 5 (SERPINA5), mRNA." |
| ILMN_1660871 | NEK6         | -0.81536 | 3.02E-06 | 0.000778 | -8.16721 | Down | "Homo sapiens NIMA (never in mitosis gene a)-related kinase 6 (NEK6), mRNA."                                      |
| ILMN_1700081 | FST          | -1.34949 | 3.1E-06  | 0.000788 | -8.14849 | Down | "Homo sapiens follistatin (FST), transcript variant FST344, mRNA."                                                |
| ILMN_1689336 | HOXA10       | -2.72701 | 3.36E-06 | 0.000832 | -8.08515 | Down | "Homo sapiens homeobox A10 (HOXA10), transcript variant 1, mRNA."                                                 |
| ILMN_1801226 | DOCK6        | -1.38028 | 3.68E-06 | 0.000876 | -8.01329 | Down | "Homo sapiens dedicator of cytokinesis 6 (DOCK6), mRNA."                                                          |
| ILMN_2057479 | EGFL6        | -4.20941 | 3.72E-06 | 0.000876 | -8.00407 | Down | "Homo sapiens EGF-like-domain, multiple 6 (EGFL6), mRNA."                                                         |
| ILMN_1680367 | C10ORF90     | -1.54806 | 4.08E-06 | 0.000933 | -7.93248 | Down | "Homo sapiens chromosome 10 open reading frame 90 (C10orf90), mRNA."                                              |
| ILMN_1683844 | HSD17B13     | -2.31547 | 4.5E-06  | 0.000992 | -7.85644 | Down | "Homo sapiens hydroxysteroid (17-beta) dehydrogenase 13 (HSD17B13), mRNA."                                        |
| ILMN_1714988 | HOXD8        | -1.19742 | 4.51E-06 | 0.000992 | -7.85554 | Down | "Homo sapiens homeobox D8 (HOXD8), mRNA."                                                                         |
| ILMN_1713764 | LOC440928    | -1.73055 | 4.64E-06 | 0.001017 | -7.83283 | Down | "PREDICTED: Homo sapiens hypothetical LOC440928 (LOC440928), mRNA."                                               |
| ILMN_3241729 | EMX2OS       | -1.14684 | 4.8E-06  | 0.001046 | -7.80766 | Down | "Homo sapiens EMX2 opposite strand (non-protein coding) (EMX2OS), non-coding RNA."                                |
| ILMN_1685714 | INHBB        | -1.70646 | 5.28E-06 | 0.001116 | -7.73379 | Down | "Homo sapiens inhibin, beta B (activin AB beta polypeptide) (INHBB), mRNA."                                       |
| ILMN_2390919 | FBLN2        | -0.81798 | 5.47E-06 | 0.001151 | -7.70691 | Down | "Homo sapiens fibulin 2 (FBLN2), transcript variant 2, mRNA."                                                     |
| ILMN_2038775 | TUBB2A       | -1.66725 | 5.57E-06 | 0.001167 | -7.69276 | Down | "Homo sapiens tubulin, beta 2A (TUBB2A), mRNA."                                                                   |
| ILMN_1724994 | COL4A2       | -1.32593 | 5.68E-06 | 0.001179 | -7.67812 | Down | "Homo sapiens collagen, type IV, alpha 2 (COL4A2), mRNA."                                                         |
| ILMN_1672908 | TWIST1       | -1.97748 | 5.75E-06 | 0.001186 | -7.66873 | Down | "Homo sapiens twist homolog 1 (Drosophila) (TWIST1), mRNA."                                                       |
| ILMN_1653028 | COL4A1       | -0.87182 | 5.91E-06 | 0.0012   | -7.64853 | Down | "Homo sapiens collagen, type IV, alpha 1 (COL4A1), mRNA."                                                         |
| ILMN_1726589 | CD248        | -1.52098 | 6.13E-06 | 0.001231 | -7.62072 | Down | "Homo sapiens CD248 molecule, endosialin (CD248), mRNA."                                                          |
| ILMN_2075892 | LRP5         | -1.43593 | 6.24E-06 | 0.001236 | -7.60715 | Down | "Homo sapiens low density lipoprotein receptor-related protein 5 (LRP5), mRNA."                                   |
| ILMN_1663490 | ZNF541       | -1.42234 | 6.58E-06 | 0.001282 | -7.56708 | Down | "Homo sapiens zinc finger protein 541 (ZNF541), mRNA."                                                            |
| ILMN_2396039 | HOXC6        | -1.16631 | 6.63E-06 | 0.001286 | -7.56162 | Down | "Homo sapiens homeobox C6 (HOXC6), transcript variant 2, mRNA."                                                   |
| ILMN_1790350 | TPRG1        | -1.51709 | 6.85E-06 | 0.001314 | -7.53712 | Down | "Homo sapiens tumor protein p63 regulated 1 (TPRG1), mRNA."                                                       |
| ILMN_1812461 | WISP2        | -1.9995  | 7E-06    | 0.001321 | -7.52043 | Down | "Homo sapiens WNT1 inducible signaling pathway protein 2 (WISP2), mRNA."                                          |
| ILMN_3199911 | LOC100133058 | -0.9852  | 7.03E-06 | 0.001321 | -7.51811 | Down | "PREDICTED: Homo sapiens misc_RNA (LOC100133058), miscRNA."                                                       |
| ILMN_1777397 | MSX1         | -1.66709 | 8.07E-06 | 0.001479 | -7.4154  | Down | "Homo sapiens msh homeobox 1 (MSX1), mRNA."                                                                       |
| ILMN_2329679 | TPST2        | -0.97605 | 8.97E-06 | 0.001608 | -7.33688 | Down | "Homo sapiens tyrosylprotein sulfotransferase 2 (TPST2), transcript variant 1, mRNA."                             |
| ILMN_1678170 | MME          | -1.85544 | 9.09E-06 | 0.001616 | -7.32759 | Down | "Homo sapiens membrane metallo-endopeptidase (MME), transcript variant 1, mRNA."                                  |
| ILMN_1764714 | LOC55908     | -2.85613 | 1.1E-05  | 0.001865 | -7.18542 | Down | "Homo sapiens hepatocellular carcinoma-associated gene TD26 (LOC55908), mRNA."                                    |
| ILMN_1709593 | EN1          | -1.06609 | 1.15E-05 | 0.001903 | -7.15574 | Down | "Homo sapiens engrailed homeobox 1 (EN1), mRNA."                                                                  |
| ILMN_2107991 | HABP4        | -1.19103 | 1.16E-05 | 0.001903 | -7.14894 | Down | "Homo sapiens hyaluronan binding protein 4 (HABP4), mRNA."                                                        |

|              |           |          |          |          |          |      |                                                                                                                                         |
|--------------|-----------|----------|----------|----------|----------|------|-----------------------------------------------------------------------------------------------------------------------------------------|
| ILMN_2070521 | BHMT2     | -2.03678 | 1.32E-05 | 0.002096 | -7.05636 | Down | "Homo sapiens betaine-homocysteine methyltransferase 2 (BHMT2), mRNA."                                                                  |
| ILMN_1741404 | MSC       | -1.7556  | 1.35E-05 | 0.002126 | -7.03852 | Down | "Homo sapiens muscudin (activated B-cell factor-1) (MSC), mRNA."                                                                        |
| ILMN_1652631 | GLIPR2    | -1.2844  | 1.36E-05 | 0.002126 | -7.03694 | Down | "Homo sapiens GLI pathogenesis-related 2 (GLIPR2), mRNA."                                                                               |
| ILMN_1711699 | LOC728014 | -1.10225 | 1.36E-05 | 0.002129 | -7.03326 | Down | "PREDICTED: Homo sapiens similar to huntingtin interacting protein 1 related (LOC728014), mRNA."                                        |
| ILMN_1714067 | NTRK2     | -1.4948  | 1.37E-05 | 0.002139 | -7.02771 | Down | "Homo sapiens neurotrophic tyrosine kinase, receptor, type 2 (NTRK2), transcript variant b, mRNA."                                      |
| ILMN_1798372 | ANXA2P3   | -0.78301 | 1.4E-05  | 0.002168 | -7.01176 | Down | "Homo sapiens annexin A2 pseudogene 3 (ANXA2P3), non-coding RNA."                                                                       |
| ILMN_1814397 | EPB42     | -1.13127 | 1.46E-05 | 0.002242 | -6.98232 | Down | "Homo sapiens erythrocyte membrane protein band 4.2 (EPB42), mRNA."                                                                     |
| ILMN_1722945 | C6ORF52   | -0.84037 | 1.5E-05  | 0.002277 | -6.96673 | Down | "PREDICTED: Homo sapiens chromosome 6 open reading frame 52 (C6orf52), mRNA."                                                           |
| ILMN_1737394 | LMNA      | -0.90427 | 1.51E-05 | 0.002291 | -6.95996 | Down | "Homo sapiens lamin A/C (LMNA), transcript variant 2, mRNA."                                                                            |
| ILMN_2306661 | UNC13C    | -1.23756 | 1.55E-05 | 0.00233  | -6.94142 | Down | "Homo sapiens unc-13 homolog C (C. elegans) (UNC13C), mRNA."                                                                            |
| ILMN_2187746 | EMX2      | -1.94359 | 1.63E-05 | 0.002421 | -6.90755 | Down | "Homo sapiens empty spiracles homeobox 2 (EMX2), mRNA."                                                                                 |
| ILMN_2049184 | DNASE1L3  | -2.58347 | 1.71E-05 | 0.002525 | -6.87098 | Down | "Homo sapiens deoxyribonuclease I-like 3 (DNASE1L3), mRNA."                                                                             |
| ILMN_1704091 | DGAT1     | -1.21204 | 1.81E-05 | 0.002641 | -6.8328  | Down | "Homo sapiens diacylglycerol O-acyltransferase homolog 1 (mouse) (DGAT1), mRNA."                                                        |
| ILMN_1729596 | INF2      | -1.05949 | 1.9E-05  | 0.002721 | -6.79916 | Down | "Homo sapiens inverted formin, FH2 and WH2 domain containing (INF2), transcript variant 3, mRNA."                                       |
| ILMN_3241657 | TMEM204   | -0.72852 | 1.97E-05 | 0.002812 | -6.77187 | Down | "Homo sapiens transmembrane protein 204 (TMEM204), mRNA."                                                                               |
| ILMN_2062620 | NMT2      | -1.15819 | 2.01E-05 | 0.002844 | -6.75985 | Down | "Homo sapiens N-myristoyltransferase 2 (NMT2), mRNA."                                                                                   |
| ILMN_1707232 | EBF3      | -0.86728 | 2.14E-05 | 0.002957 | -6.71617 | Down | "Homo sapiens early B-cell factor 3 (EBF3), mRNA."                                                                                      |
| ILMN_1669888 | CSTA      | -1.13823 | 2.22E-05 | 0.002988 | -6.68924 | Down | "Homo sapiens cystatin A (stefin A) (CSTA), mRNA."                                                                                      |
| ILMN_1702822 | NTRK2     | -1.07166 | 2.23E-05 | 0.002988 | -6.68681 | Down | "Homo sapiens neurotrophic tyrosine kinase, receptor, type 2 (NTRK2), transcript variant a, mRNA."                                      |
| ILMN_2141482 | SERPINF1  | -0.84126 | 2.24E-05 | 0.002998 | -6.68254 | Down | "Homo sapiens serpin peptidase inhibitor, clade F (alpha-2 antiplasmin, pigment epithelium derived factor), member 1 (SERPINF1), mRNA." |
| ILMN_1666894 | CSPG4     | -1.70754 | 2.43E-05 | 0.003218 | -6.62596 | Down | "Homo sapiens chondroitin sulfate proteoglycan 4 (CSPG4), mRNA."                                                                        |
| ILMN_3310065 | SFTA1P    | -1.26485 | 2.46E-05 | 0.003227 | -6.61984 | Down | "Homo sapiens surfactant associated 1 (pseudogene) (SFTA1P), non-coding RNA."                                                           |
| ILMN_1754795 | FAT1      | -0.76351 | 2.48E-05 | 0.003235 | -6.6127  | Down | "Homo sapiens FAT tumor suppressor homolog 1 (Drosophila) (FAT1), mRNA."                                                                |
| ILMN_1712461 | CBLN1     | -1.59769 | 2.54E-05 | 0.003291 | -6.59722 | Down | "Homo sapiens cerebellin 1 precursor (CBLN1), mRNA."                                                                                    |
| ILMN_1698313 | CPM       | -1.18671 | 2.57E-05 | 0.003312 | -6.58907 | Down | "Homo sapiens carboxypeptidase M (CPM), transcript variant 1, mRNA."                                                                    |
| ILMN_1769129 | CCL19     | -2.3251  | 2.73E-05 | 0.003476 | -6.54662 | Down | "Homo sapiens chemokine (C-C motif) ligand 19 (CCL19), mRNA."                                                                           |
| ILMN_1658926 | NOTCH3    | -1.1822  | 2.84E-05 | 0.003561 | -6.52091 | Down | "Homo sapiens Notch homolog 3 (Drosophila) (NOTCH3), mRNA."                                                                             |
| ILMN_1751901 | TMEM163   | -1.0673  | 3.03E-05 | 0.003714 | -6.47622 | Down | "Homo sapiens transmembrane protein 163 (TMEM163), mRNA."                                                                               |
| ILMN_1733841 | TCF7L1    | -1.00635 | 3.13E-05 | 0.003788 | -6.45345 | Down | "Homo sapiens transcription factor 7-like 1 (T-cell specific, HMG-box) (TCF7L1), mRNA."                                                 |
| ILMN_1767349 | ABCB4     | -0.80452 | 3.19E-05 | 0.00383  | -6.44105 | Down | "Homo sapiens ATP-binding cassette, sub-family B (MDR/TAP), member 4 (ABCB4), transcript variant C, mRNA."                              |
| ILMN_1684357 | C14ORF139 | -0.91169 | 3.2E-05  | 0.00383  | -6.43878 | Down | "PREDICTED: Homo sapiens chromosome 14 open reading frame 139 (C14orf139), misc RNA."                                                   |
| ILMN_1683470 | TMEM139   | -1.23539 | 3.25E-05 | 0.003868 | -6.42946 | Down | "Homo sapiens transmembrane protein 139 (TMEM139), mRNA."                                                                               |
| ILMN_2129161 | LRRC32    | -0.81322 | 3.34E-05 | 0.003926 | -6.41095 | Down | "Homo sapiens leucine rich repeat containing 32 (LRRC32), mRNA."                                                                        |
| ILMN_1756701 | DHRS11    | -1.22704 | 3.52E-05 | 0.004061 | -6.37488 | Down | "Homo sapiens dehydrogenase/reductase (SDR family) member 11 (DHRS11), mRNA."                                                           |



|              |           |          |          |          |          |      |                                                                                                                                                                                       |
|--------------|-----------|----------|----------|----------|----------|------|---------------------------------------------------------------------------------------------------------------------------------------------------------------------------------------|
| ILMN_1742866 | F2R       | -0.9017  | 3.71E-05 | 0.004208 | -6.33946 | Down | "Homo sapiens coagulation factor II (thrombin) receptor (F2R), mRNA."                                                                                                                 |
| ILMN_1774602 | FBLN2     | -0.74013 | 3.88E-05 | 0.004356 | -6.30886 | Down | "Homo sapiens fibulin 2 (FBLN2), transcript variant 2, mRNA."                                                                                                                         |
| ILMN_1785732 | TNFAIP6   | -1.68406 | 3.91E-05 | 0.004368 | -6.30342 | Down | "Homo sapiens tumor necrosis factor, alpha-induced protein 6 (TNFAIP6), mRNA."                                                                                                        |
| ILMN_3239775 | ODZ4      | -1.59437 | 4.01E-05 | 0.004447 | -6.28664 | Down | "Homo sapiens odz, odd Oz/ten-m homolog 4 (Drosophila) (ODZ4), mRNA."                                                                                                                 |
| ILMN_2117508 | CTHRC1    | -1.95139 | 4.04E-05 | 0.00445  | -6.28149 | Down | "Homo sapiens collagen triple helix repeat containing 1 (CTHRC1), mRNA."                                                                                                              |
| ILMN_1793695 | ITIH5     | -1.97618 | 4.13E-05 | 0.004507 | -6.26677 | Down | "Homo sapiens inter-alpha (globulin) inhibitor H5 (ITIH5), transcript variant 3, mRNA."                                                                                               |
| ILMN_1715416 | NUP188    | -0.79836 | 4.17E-05 | 0.00452  | -6.26138 | Down | "Homo sapiens nucleoporin 188kDa (NUP188), mRNA."<br>"Homo sapiens UDP-N-acetyl-alpha-D-galactosamine:polypeptide N-acetylgalactosaminyltransferase 13 (GalNAc-T13) (GALNT13), mRNA." |
| ILMN_1738869 | GALNT13   | -1.13989 | 4.2E-05  | 0.004533 | -6.25682 | Down | "Homo sapiens sodium channel, voltage-gated, type IV, alpha subunit (SCN4A), mRNA."                                                                                                   |
| ILMN_1731914 | SCN4A     | -1.51496 | 4.21E-05 | 0.004541 | -6.25423 | Down | "Homo sapiens lipopolysaccharide binding protein (LBP), mRNA."                                                                                                                        |
| ILMN_1732538 | LBP       | -2.69831 | 4.23E-05 | 0.004555 | -6.25065 | Down | "PREDICTED: Homo sapiens similar to arylacetamide deacetylase, transcript variant 2 (LOC126767), mRNA."                                                                               |
| ILMN_1812867 | LOC126767 | -0.81237 | 4.53E-05 | 0.004821 | -6.20529 | Down | "Homo sapiens neuromedin U receptor 1 (NMUR1), mRNA."                                                                                                                                 |
| ILMN_1729287 | NMUR1     | -1.36466 | 4.69E-05 | 0.004942 | -6.18296 | Down | "Homo sapiens glypican 1 (GPC1), mRNA."                                                                                                                                               |
| ILMN_1801516 | GPC1      | -1.57157 | 4.81E-05 | 0.005037 | -6.16602 | Down | "UI-H-B11-adn-f-06-0-UI.s1 NCI_CGAP_Sub3 Homo sapiens cDNA clone IMAGE:2717339 3, mRNA sequence"                                                                                      |
| ILMN_1886487 | HS.559234 | -1.1233  | 4.83E-05 | 0.005048 | -6.16309 | Down | "AGENCOURT_6808794 NIH_MGC_71 Homo sapiens cDNA clone IMAGE:5784515 5, mRNA sequence"                                                                                                 |
| ILMN_1874678 | HS.26579  | -0.94618 | 4.91E-05 | 0.005088 | -6.15211 | Down | "Homo sapiens empty spiracles homeobox 2 (EMX2), mRNA."                                                                                                                               |
| ILMN_1751439 | EMX2      | -1.31481 | 4.99E-05 | 0.005159 | -6.14142 | Down | "Homo sapiens microtubule-associated protein tau (MAPT), transcript variant 3, mRNA."                                                                                                 |
| ILMN_1710903 | MAPT      | -0.92864 | 5.09E-05 | 0.005232 | -6.12932 | Down | "Homo sapiens hyaluronan binding protein 4 (HABP4), mRNA."                                                                                                                            |
| ILMN_1792384 | HABP4     | -1.02189 | 5.17E-05 | 0.005279 | -6.11912 | Down | "Homo sapiens nicotinamide nucleotide adenylyltransferase 2 (NMNAT2), transcript variant 1, mRNA."                                                                                    |
| ILMN_1803818 | NMNAT2    | -1.42967 | 5.27E-05 | 0.005329 | -6.10625 | Down | "Homo sapiens neurotrophic tyrosine kinase, receptor, type 2 (NTRK2), transcript variant d, mRNA."                                                                                    |
| ILMN_2357855 | NTRK2     | -1.08201 | 5.29E-05 | 0.005329 | -6.10304 | Down | "Homo sapiens protocadherin 7 (PCDH7), transcript variant c, mRNA."                                                                                                                   |
| ILMN_1670383 | PCDH7     | -1.03034 | 5.31E-05 | 0.005334 | -6.10104 | Down | "Homo sapiens KIAA1217 (KIAA1217), transcript variant 2, mRNA."                                                                                                                       |
| ILMN_1706960 | KIAA1217  | -0.80426 | 5.36E-05 | 0.005358 | -6.09445 | Down | "Homo sapiens ADAM metallopeptidase with thrombospondin type 1 motif, 2 (ADAMTS2), transcript variant 2, mRNA."                                                                       |
| ILMN_1811765 | ADAMTS2   | -0.91855 | 5.46E-05 | 0.005441 | -6.08248 | Down | "PREDICTED: Homo sapiens hypothetical LOC388814 (LOC388814), mRNA."                                                                                                                   |
| ILMN_1729831 | LOC388814 | -1.79075 | 5.95E-05 | 0.005829 | -6.0264  | Down | "Homo sapiens androgen-induced 1 (AIG1), mRNA."                                                                                                                                       |
| ILMN_1797974 | AIG1      | -0.87203 | 5.99E-05 | 0.005848 | -6.02226 | Down | "Homo sapiens purinergic receptor P2X, ligand-gated ion channel, 6 (P2RX6), transcript variant 1, mRNA."                                                                              |
| ILMN_3243924 | P2RX6     | -2.50443 | 6.04E-05 | 0.00587  | -6.01647 | Down | "Homo sapiens aldolase C, fructose-bisphosphate (ALDOC), mRNA."                                                                                                                       |
| ILMN_1755974 | ALDOC     | -1.87486 | 6.13E-05 | 0.005904 | -6.0068  | Down | "Homo sapiens stathmin-like 2 (STMN2), mRNA."                                                                                                                                         |
| ILMN_1795679 | STMN2     | -3.62531 | 6.14E-05 | 0.005904 | -6.00603 | Down | "Homo sapiens low density lipoprotein receptor-related protein 5 (LRP5), mRNA."                                                                                                       |
| ILMN_1702775 | LRP5      | -1.34727 | 6.32E-05 | 0.006028 | -5.98724 | Down | "Homo sapiens corticotropin releasing hormone binding protein (CRHBP), mRNA."                                                                                                         |
| ILMN_1761312 | CRHBP     | -1.68538 | 6.69E-05 | 0.006304 | -5.94983 | Down | "Homo sapiens FAT tumor suppressor homolog 1 (Drosophila) (FAT1), mRNA."                                                                                                              |
| ILMN_3247578 | FAT1      | -0.97003 | 6.81E-05 | 0.006379 | -5.93838 | Down | "Homo sapiens 2-hydroxyacyl-CoA lyase 1 (HACL1), mRNA."                                                                                                                               |
| ILMN_1723414 | HACL1     | -0.81225 | 6.98E-05 | 0.006453 | -5.92248 | Down | "Homo sapiens alkaline phosphatase, liver/bone/kidney (ALPL), transcript variant 1, mRNA."                                                                                            |
| ILMN_1701603 | ALPL      | -1.53611 | 7.01E-05 | 0.006457 | -5.91994 | Down |                                                                                                                                                                                       |

|              |           |          |          |          |          |      |                                                                                                                             |
|--------------|-----------|----------|----------|----------|----------|------|-----------------------------------------------------------------------------------------------------------------------------|
| ILMN_3246294 | LOC728819 | -0.83884 | 7.07E-05 | 0.006482 | -5.91456 | Down | "Homo sapiens hCG1645220 (LOC728819), mRNA."                                                                                |
| ILMN_2199389 | VIPR1     | -1.18858 | 8.03E-05 | 0.007137 | -5.83252 | Down | "Homo sapiens vasoactive intestinal peptide receptor 1 (VIPR1), mRNA."                                                      |
| ILMN_1767111 | ANO10     | -0.76441 | 8.15E-05 | 0.007196 | -5.8228  | Down | "Homo sapiens anoctamin 10 (ANO10), mRNA."                                                                                  |
| ILMN_1717599 | CNTN3     | -1.25609 | 8.33E-05 | 0.007329 | -5.80849 | Down | "Homo sapiens contactin 3 (plasmacytoma associated) (CNTN3), mRNA."                                                         |
| ILMN_1755354 | YBX2      | -1.02406 | 8.45E-05 | 0.007374 | -5.80006 | Down | "Homo sapiens Y box binding protein 2 (YBX2), mRNA."                                                                        |
| ILMN_1791067 | TESK1     | -1.1465  | 8.69E-05 | 0.007521 | -5.78158 | Down | "Homo sapiens testis-specific kinase 1 (TESK1), mRNA."                                                                      |
| ILMN_3248347 | PRHOXNB   | -2.36802 | 8.87E-05 | 0.007633 | -5.76863 | Down | "Homo sapiens parahox cluster neighbor (PRHOXNB), mRNA."                                                                    |
| ILMN_1676067 | SEMA3G    | -2.25108 | 9.04E-05 | 0.007742 | -5.75693 | Down | "Homo sapiens sema domain, immunoglobulin domain (Ig), short basic domain, secreted, (semaphorin) 3G (SEMA3G), mRNA."       |
| ILMN_1722073 | MLXIPL    | -1.0962  | 9.05E-05 | 0.007742 | -5.75612 | Down | "Homo sapiens MLX interacting protein-like (MLXIPL), transcript variant 2, mRNA."                                           |
| ILMN_2317581 | SHANK3    | -0.88674 | 9.1E-05  | 0.007775 | -5.75226 | Down | "Homo sapiens SH3 and multiple ankyrin repeat domains 3 (SHANK3), mRNA."                                                    |
| ILMN_1710284 | HES1      | -1.33895 | 9.22E-05 | 0.007815 | -5.74419 | Down | "Homo sapiens hairy and enhancer of split 1, (Drosophila) (HES1), mRNA."                                                    |
| ILMN_1704253 | C6ORF106  | -0.96527 | 9.76E-05 | 0.008187 | -5.70805 | Down | "Homo sapiens chromosome 6 open reading frame 106 (C6orf106), transcript variant 1, mRNA."                                  |
| ILMN_1699665 | CLIC6     | -2.53342 | 9.84E-05 | 0.008238 | -5.703   | Down | "Homo sapiens chloride intracellular channel 6 (CLIC6), mRNA."                                                              |
| ILMN_3190833 | CCRL2     | -1.10043 | 0.000101 | 0.008375 | -5.68695 | Down | "Homo sapiens chemokine (C-C motif) receptor-like 2 (CCRL2), transcript variant 2, mRNA."                                   |
| ILMN_1707337 | MSTO1     | -1.09961 | 0.000104 | 0.008494 | -5.67031 | Down | "Homo sapiens misato homolog 1 (Drosophila) (MSTO1), mRNA."                                                                 |
| ILMN_1813043 | BHMT2     | -1.83449 | 0.000104 | 0.008524 | -5.667   | Down | "Homo sapiens betaine-homocysteine methyltransferase 2 (BHMT2), mRNA."                                                      |
| ILMN_1764729 | JAG2      | -0.75627 | 0.000105 | 0.0086   | -5.65886 | Down | "Homo sapiens jagged 2 (JAG2), transcript variant 1, mRNA."                                                                 |
| ILMN_1696749 | LMNA      | -0.82584 | 0.000106 | 0.0086   | -5.65702 | Down | "Homo sapiens lamin A/C (LMNA), transcript variant 2, mRNA."                                                                |
| ILMN_1738558 | RGS20     | -1.27237 | 0.000109 | 0.00878  | -5.6396  | Down | "Homo sapiens regulator of G-protein signaling 20 (RGS20), transcript variant 1, mRNA."                                     |
| ILMN_1738657 | SATB2     | -0.99995 | 0.000113 | 0.009014 | -5.61537 | Down | "Homo sapiens SATB homeobox 2 (SATB2), mRNA."                                                                               |
| ILMN_1792571 | ARHGEF15  | -1.21232 | 0.000114 | 0.009027 | -5.6115  | Down | "Homo sapiens Rho guanine nucleotide exchange factor (GEF) 15 (ARHGEF15), mRNA."                                            |
| ILMN_1738749 | MAST3     | -0.76235 | 0.000115 | 0.009092 | -5.60487 | Down | "Homo sapiens microtubule associated serine/threonine kinase 3 (MAST3), mRNA."                                              |
| ILMN_3249281 | HOXA11AS  | -0.74242 | 0.000116 | 0.009187 | -5.59664 | Down | "Homo sapiens HOXA11 antisense RNA (non-protein coding) (HOXA11AS), antisense RNA."                                         |
| ILMN_1707310 | MGLL      | -1.34445 | 0.00012  | 0.009392 | -5.57821 | Down | "Homo sapiens monoglyceride lipase (MGLL), transcript variant 2, mRNA."                                                     |
| ILMN_1669788 | NUDT14    | -0.94395 | 0.000121 | 0.00949  | -5.57071 | Down | "Homo sapiens nudix (nucleoside diphosphate linked moiety X)-type motif 14 (NUDT14), mRNA."                                 |
| ILMN_1703650 | TNIP1     | -1.00328 | 0.000123 | 0.009546 | -5.5629  | Down | "Homo sapiens TNFAIP3 interacting protein 1 (TNIP1), mRNA."                                                                 |
| ILMN_1666022 | TNFRSF10D | -0.83951 | 0.000123 | 0.009555 | -5.56123 | Down | "Homo sapiens tumor necrosis factor receptor superfamily, member 10d, decoy with truncated death domain (TNFRSF10D), mRNA." |
| ILMN_1740523 | KTN1      | -0.84805 | 0.000125 | 0.009628 | -5.55444 | Down | "Homo sapiens kinectin 1 (kinesin receptor) (KTN1), transcript variant 1, mRNA."                                            |
| ILMN_2360401 | LFNG      | -1.33282 | 0.000125 | 0.009631 | -5.55321 | Down | "Homo sapiens LFNG O-fucosylpeptide 3-beta-N-acetylglucosaminyltransferase (LFNG), transcript variant 2, mRNA."             |
| ILMN_2112744 | P2RX6P    | -1.30056 | 0.000126 | 0.009704 | -5.54547 | Down | "Homo sapiens purinergic receptor P2X, ligand-gated ion channel, 6 pseudogene (P2RX6P), non-coding RNA."                    |
| ILMN_2179083 | LOXL4     | -0.9091  | 0.000127 | 0.00977  | -5.54022 | Down | "Homo sapiens lysyl oxidase-like 4 (LOXL4), mRNA."                                                                          |
| ILMN_1741727 | QPCT      | -1.1069  | 0.000134 | 0.010114 | -5.50957 | Down | "Homo sapiens glutaminyl-peptide cyclotransferase (QPCT), mRNA."                                                            |
| ILMN_2414568 | MEOX1     | -1.39981 | 0.000136 | 0.010271 | -5.49899 | Down | "Homo sapiens mesenchyme homeobox 1 (MEOX1), transcript variant 3, mRNA."                                                   |
| ILMN_1789639 | FMOD      | -1.00438 | 0.000139 | 0.010427 | -5.48474 | Down | "Homo sapiens fibromodulin (FMOD), mRNA."                                                                                   |

|              |              |          |          |          |          |      |                                                                                                                                 |
|--------------|--------------|----------|----------|----------|----------|------|---------------------------------------------------------------------------------------------------------------------------------|
| ILMN_1695506 | DKK2         | -1.38552 | 0.000139 | 0.010427 | -5.48464 | Down | "Homo sapiens dickkopf homolog 2 (Xenopus laevis) (DKK2), mRNA."                                                                |
| ILMN_1692664 | PRR5         | -1.04271 | 0.00014  | 0.01046  | -5.48047 | Down | "Homo sapiens proline rich 5 (renal) (PRR5), transcript variant 5, mRNA."                                                       |
| ILMN_1741003 | ANXA5        | -0.8082  | 0.000141 | 0.01046  | -5.47679 | Down | "Homo sapiens annexin A5 (ANXA5), mRNA."                                                                                        |
| ILMN_1657708 | MGLL         | -1.08707 | 0.000143 | 0.010547 | -5.46811 | Down | "Homo sapiens monoglyceride lipase (MGLL), transcript variant 1, mRNA."                                                         |
| ILMN_3244114 | DHRS11       | -1.4554  | 0.000143 | 0.010547 | -5.46707 | Down | "Homo sapiens dehydrogenase/reductase (SDR family) member 11 (DHRS11), mRNA."                                                   |
| ILMN_2373791 | ENPP2        | -0.87172 | 0.000144 | 0.010555 | -5.46395 | Down | "Homo sapiens ectonucleotide pyrophosphatase/phosphodiesterase 2 (ENPP2), transcript variant 2, mRNA."                          |
| ILMN_1723004 | CD72         | -0.90272 | 0.000145 | 0.010561 | -5.4602  | Down | "Homo sapiens CD72 molecule (CD72), mRNA."                                                                                      |
| ILMN_1778956 | STS          | -1.53224 | 0.000145 | 0.010562 | -5.45919 | Down | "Homo sapiens steroid sulfatase (microsomal), isozyme S (STS), mRNA."                                                           |
| ILMN_1677429 | TWIST2       | -1.12175 | 0.000153 | 0.010937 | -5.42621 | Down | "Homo sapiens twist homolog 2 (Drosophila) (TWIST2), mRNA."                                                                     |
| ILMN_1692938 | PSAT1        | -1.18242 | 0.000154 | 0.010971 | -5.4232  | Down | "Homo sapiens phosphoserine aminotransferase 1 (PSAT1), transcript variant 2, mRNA."                                            |
| ILMN_1751785 | DMRT2        | -2.38096 | 0.000155 | 0.010973 | -5.41957 | Down | "Homo sapiens doublesex and mab-3 related transcription factor 2 (DMRT2), transcript variant 1, mRNA."                          |
| ILMN_2335557 | ITIH5        | -1.43764 | 0.000157 | 0.011087 | -5.41051 | Down | "Homo sapiens inter-alpha (globulin) inhibitor H5 (ITIH5), transcript variant 1, mRNA."                                         |
| ILMN_1811363 | NOVA1        | -1.45716 | 0.000158 | 0.011132 | -5.40696 | Down | "Homo sapiens neuro-oncological ventral antigen 1 (NOVA1), transcript variant 3, mRNA."                                         |
| ILMN_1716507 | EPB41L1      | -0.92845 | 0.00016  | 0.011266 | -5.39679 | Down | "Homo sapiens erythrocyte membrane protein band 4.1-like 1 (EPB41L1), transcript variant 1, mRNA."                              |
| ILMN_1725090 | CTHRC1       | -1.33182 | 0.000162 | 0.011304 | -5.38925 | Down | "Homo sapiens collagen triple helix repeat containing 1 (CTHRC1), mRNA."                                                        |
| ILMN_2266962 | GYPE         | -0.79174 | 0.000165 | 0.011444 | -5.37805 | Down | "Homo sapiens glycophorin E (GYPE), transcript variant 2, mRNA."                                                                |
| ILMN_1785218 | MTCH2        | -0.74228 | 0.000167 | 0.011526 | -5.37277 | Down | "Homo sapiens mitochondrial carrier homolog 2 (C. elegans) (MTCH2), nuclear gene encoding mitochondrial protein, mRNA."         |
| ILMN_1740917 | SCNN1B       | -0.98499 | 0.00017  | 0.01167  | -5.35975 | Down | "Homo sapiens sodium channel, nonvoltage-gated 1, beta (SCNN1B), mRNA."                                                         |
| ILMN_1751559 | C16ORF30     | -0.73696 | 0.000171 | 0.011693 | -5.35727 | Down | "Homo sapiens chromosome 16 open reading frame 30 (C16orf30), mRNA."                                                            |
| ILMN_1744381 | SERPINE1     | -1.22726 | 0.000172 | 0.011707 | -5.35493 | Down | "Homo sapiens serpin peptidase inhibitor, clade E (nexin), plasminogen activator inhibitor type 1), member 1 (SERPINE1), mRNA." |
| ILMN_2384122 | GPR56        | -0.94072 | 0.000172 | 0.011707 | -5.35426 | Down | "Homo sapiens G protein-coupled receptor 56 (GPR56), transcript variant 3, mRNA."                                               |
| ILMN_1720484 | CRTAP        | -0.83417 | 0.000175 | 0.011826 | -5.34453 | Down | "Homo sapiens cartilage associated protein (CRTAP), mRNA."                                                                      |
| ILMN_1797191 | KIAA0040     | -1.28646 | 0.000175 | 0.011837 | -5.34163 | Down | "Homo sapiens KIAA0040 (KIAA0040), mRNA."                                                                                       |
| ILMN_2235354 | PWWP2        | -1.04551 | 0.000176 | 0.011837 | -5.3413  | Down | "Homo sapiens PWWP domain containing 2 (PWWP2), mRNA."                                                                          |
| ILMN_1660552 | BMP5         | -0.77082 | 0.00018  | 0.012033 | -5.32685 | Down | "Homo sapiens bone morphogenetic protein 5 (BMP5), mRNA."                                                                       |
| ILMN_1709630 | CCDC107      | -1.44529 | 0.000186 | 0.012325 | -5.30526 | Down | "Homo sapiens coiled-coil domain containing 107 (CCDC107), mRNA."                                                               |
| ILMN_1690034 | SOD3         | -1.08141 | 0.000193 | 0.012663 | -5.28362 | Down | "Homo sapiens superoxide dismutase 3, extracellular (SOD3), mRNA."                                                              |
| ILMN_1657145 | MEOX1        | -1.44907 | 0.000194 | 0.012683 | -5.2795  | Down | "Homo sapiens mesenchyme homeobox 1 (MEOX1), transcript variant 3, mRNA."                                                       |
| ILMN_1677768 | POR          | -0.77148 | 0.000195 | 0.012683 | -5.27842 | Down | "Homo sapiens P450 (cytochrome) oxidoreductase (POR), mRNA."                                                                    |
| ILMN_1758272 | MYPN         | -0.99276 | 0.000206 | 0.013139 | -5.24273 | Down | "Homo sapiens myopalladin (MYPN), mRNA."                                                                                        |
| ILMN_1660554 | VWA1         | -0.92767 | 0.000215 | 0.013481 | -5.21897 | Down | "Homo sapiens von Willebrand factor A domain containing 1 (VWA1), transcript variant 2, mRNA."                                  |
| ILMN_1699728 | BTD          | -0.73065 | 0.000216 | 0.013552 | -5.21393 | Down | "Homo sapiens biotinidase (BTD), mRNA."                                                                                         |
| ILMN_3243644 | LOC100132564 | -3.22333 | 0.000219 | 0.013651 | -5.20574 | Down | "PREDICTED: Homo sapiens hypothetical protein LOC100132564 (LOC100132564), mRNA."                                               |
| ILMN_1681520 | DGAT2        | -1.01235 | 0.000226 | 0.013939 | -5.18838 | Down | "Homo sapiens diacylglycerol O-acyltransferase homolog 2 (mouse) (DGAT2), mRNA."                                                |

|              |              |          |          |          |          |      |                                                                                                                                    |
|--------------|--------------|----------|----------|----------|----------|------|------------------------------------------------------------------------------------------------------------------------------------|
| ILMN_1654072 | CX3CL1       | -0.83784 | 0.000228 | 0.014041 | -5.18229 | Down | "Homo sapiens chemokine (C-X3-C motif) ligand 1 (CX3CL1), mRNA."                                                                   |
| ILMN_2150112 | NRN1         | -1.29418 | 0.00023  | 0.01414  | -5.17568 | Down | "Homo sapiens neuritin 1 (NRN1), mRNA."                                                                                            |
| ILMN_1890614 | HS.193406    | -0.78894 | 0.000231 | 0.014152 | -5.17438 | Down | "Homo sapiens cDNA FLJ34755 fis, clone NHNPC1000034"                                                                               |
| ILMN_3177532 | CECR4        | -0.85792 | 0.000235 | 0.0143   | -5.16417 | Down | "Homo sapiens cat eye syndrome chromosome region, candidate 4 (non-protein coding) (CECR4), transcript variant 2, non-coding RNA." |
| ILMN_1716465 | RBP7         | -1.24206 | 0.000242 | 0.014633 | -5.14562 | Down | "Homo sapiens retinol binding protein 7, cellular (RBP7), mRNA."                                                                   |
| ILMN_3307729 | CXXC5        | -0.84078 | 0.000248 | 0.014887 | -5.13211 | Down | "Homo sapiens CXXC finger 5 (CXXC5), mRNA."                                                                                        |
| ILMN_1678757 | BCYRN1       | -1.23584 | 0.000248 | 0.01491  | -5.13043 | Down | "Homo sapiens brain cytoplasmic RNA 1 (non-protein coding) (BCYRN1), non-coding RNA."                                              |
| ILMN_1782939 | ALB          | -1.33198 | 0.000251 | 0.014958 | -5.12472 | Down | "Homo sapiens albumin (ALB), mRNA."                                                                                                |
| ILMN_1663454 | PKP1         | -1.55835 | 0.000251 | 0.014958 | -5.12469 | Down | "Homo sapiens plakophilin 1 (ectodermal dysplasia/skin fragility syndrome) (PKP1), transcript variant 1a, mRNA."                   |
| ILMN_1701643 | GDPD5        | -1.08077 | 0.000255 | 0.015144 | -5.11419 | Down | "Homo sapiens glycerophosphodiester phosphodiesterase domain containing 5 (GDPD5), mRNA."                                          |
| ILMN_3289779 | LOC100131471 | -1.14413 | 0.00026  | 0.01528  | -5.10355 | Down | "PREDICTED: Homo sapiens misc_RNA (LOC100131471), miscRNA."                                                                        |
| ILMN_2409290 | CCPG1        | -0.92079 | 0.00026  | 0.015289 | -5.10243 | Down | "Homo sapiens cell cycle progression 1 (CCPG1), transcript variant 2, mRNA."                                                       |
| ILMN_1765274 | CAPN11       | -1.38463 | 0.000262 | 0.015366 | -5.09818 | Down | "Homo sapiens calpain 11 (CAPN11), mRNA."                                                                                          |
| ILMN_1719236 | CDH5         | -0.7663  | 0.000272 | 0.015767 | -5.07502 | Down | "Homo sapiens cadherin 5, type 2, VE-cadherin (vascular epithelium) (CDH5), mRNA."                                                 |
| ILMN_3240765 | ANO3         | -1.65987 | 0.000274 | 0.01584  | -5.07008 | Down | "Homo sapiens anoctamin 3 (ANO3), mRNA."                                                                                           |
| ILMN_1813148 | TOM1         | -0.73066 | 0.000276 | 0.015893 | -5.06732 | Down | "Homo sapiens target of myb1 (chicken) (TOM1), mRNA."                                                                              |
| ILMN_1755588 | ANKRD47      | -0.84968 | 0.000285 | 0.016157 | -5.04774 | Down | "Homo sapiens ankyrin repeat domain 47 (ANKRD47), mRNA."                                                                           |
| ILMN_2194688 | DKK2         | -1.5735  | 0.000289 | 0.016276 | -5.04004 | Down | "Homo sapiens dickkopf homolog 2 (Xenopus laevis) (DKK2), mRNA."                                                                   |
| ILMN_1733094 | STEAP1       | -0.81983 | 0.000289 | 0.016305 | -5.03818 | Down | "Homo sapiens six transmembrane epithelial antigen of the prostate 1 (STEAP1), mRNA."                                              |
| ILMN_1659371 | ADRA2A       | -1.59595 | 0.00029  | 0.016305 | -5.03755 | Down | "Homo sapiens adrenergic, alpha-2A-, receptor (ADRA2A), mRNA."                                                                     |
| ILMN_2207504 | LEP          | -0.79311 | 0.0003   | 0.016692 | -5.01717 | Down | "Homo sapiens leptin (obesity homolog, mouse) (LEP), mRNA."                                                                        |
| ILMN_2278335 | AKR1B15      | -1.53666 | 0.000303 | 0.016796 | -5.01003 | Down | "Homo sapiens aldo-keto reductase family 1, member B15 (AKR1B15), mRNA."                                                           |
| ILMN_1657347 | PODXL2       | -0.87342 | 0.000309 | 0.017005 | -4.99978 | Down | "Homo sapiens podocalyxin-like 2 (PODXL2), mRNA."                                                                                  |
| ILMN_2207505 | LEP          | -0.89899 | 0.000315 | 0.01722  | -4.98731 | Down | "Homo sapiens leptin (obesity homolog, mouse) (LEP), mRNA."                                                                        |
| ILMN_3199483 | LOC100131064 | -1.00215 | 0.000317 | 0.017257 | -4.98407 | Down | "PREDICTED: Homo sapiens similar to HSF1 protein (LOC100131064), mRNA."                                                            |
| ILMN_1790859 | PLAC9        | -0.8784  | 0.000319 | 0.017316 | -4.97962 | Down | "Homo sapiens placenta-specific 9 (PLAC9), mRNA."                                                                                  |
| ILMN_1709434 | VIT          | -1.0807  | 0.000319 | 0.017316 | -4.97932 | Down | "Homo sapiens vitrin (VIT), mRNA."                                                                                                 |
| ILMN_1856480 | HS.19339     | -1.21479 | 0.000321 | 0.017362 | -4.97705 | Down | Homo sapiens cDNA clone IMAGE:5263177                                                                                              |
| ILMN_2409754 | PRR5         | -1.0801  | 0.000325 | 0.01752  | -4.96824 | Down | "Homo sapiens proline rich 5 (renal) (PRR5), transcript variant 4, mRNA."                                                          |
| ILMN_1759513 | RND3         | -0.97105 | 0.000332 | 0.017711 | -4.95642 | Down | "Homo sapiens Rho family GTPase 3 (RND3), mRNA."                                                                                   |
| ILMN_2174805 | CD300LG      | -0.87167 | 0.000334 | 0.017746 | -4.95234 | Down | "Homo sapiens CD300 molecule-like family member g (CD300LG), mRNA."                                                                |
| ILMN_1687216 | PCBP3        | -1.13592 | 0.000335 | 0.017746 | -4.95147 | Down | "Homo sapiens poly(rC) binding protein 3 (PCBP3), mRNA."                                                                           |
| ILMN_2174804 | CD300LG      | -1.06126 | 0.000335 | 0.017746 | -4.95077 | Down | "Homo sapiens CD300 molecule-like family member g (CD300LG), mRNA."                                                                |
| ILMN_1782352 | VENTX        | -0.97725 | 0.000336 | 0.017763 | -4.94935 | Down | "Homo sapiens VENT homeobox homolog (Xenopus laevis) (VENTX), mRNA."                                                               |
| ILMN_2347592 | NMB          | -1.35543 | 0.000338 | 0.017829 | -4.94646 | Down | "Homo sapiens neuromedin B (NMB), transcript variant 1, mRNA."                                                                     |
| ILMN_1744937 | PTPRM        | -0.8079  | 0.00034  | 0.017878 | -4.94214 | Down | "Homo sapiens protein tyrosine phosphatase, receptor type, M (PTPRM), mRNA."                                                       |

|              |            |          |          |          |          |      |                                                                                                                                      |
|--------------|------------|----------|----------|----------|----------|------|--------------------------------------------------------------------------------------------------------------------------------------|
| ILMN_1742730 | TWIST2     | -1.36917 | 0.00034  | 0.017878 | -4.94151 | Down | "PREDICTED: Homo sapiens twist homolog 2 (Drosophila), transcript variant 1 (TWIST2), mRNA."                                         |
| ILMN_1782618 | C9ORF16    | -1.1215  | 0.000349 | 0.018155 | -4.92597 | Down | "Homo sapiens chromosome 9 open reading frame 16 (C9orf16), mRNA."                                                                   |
| ILMN_1715674 | ITPK1      | -1.49862 | 0.000356 | 0.01838  | -4.9153  | Down | "Homo sapiens inositol 1,3,4-triphosphate 5/6 kinase (ITPK1), mRNA."                                                                 |
| ILMN_3308335 | RNU6-1     | -1.37009 | 0.00037  | 0.018891 | -4.89135 | Down | "Homo sapiens RNA, U6 small nuclear 1 (RNU6-1), small nuclear RNA."                                                                  |
| ILMN_1752159 | AHNAK      | -1.40702 | 0.00037  | 0.018891 | -4.89135 | Down | "Homo sapiens AHNAK nucleoprotein (AHNAK), transcript variant 2, mRNA."                                                              |
| ILMN_1653836 | C11ORF41   | -0.83733 | 0.000379 | 0.019109 | -4.87822 | Down | "Homo sapiens chromosome 11 open reading frame 41 (C11orf41), mRNA."                                                                 |
| ILMN_1743755 | LOC441150  | -0.79701 | 0.000383 | 0.019243 | -4.87203 | Down | "PREDICTED: Homo sapiens similar to RIKEN cDNA 2310039H08 (LOC441150), mRNA."                                                        |
| ILMN_1815032 | SOX7       | -0.93932 | 0.000385 | 0.019243 | -4.86878 | Down | "Homo sapiens SRY (sex determining region Y)-box 7 (SOX7), mRNA."                                                                    |
| ILMN_1713124 | AKR1C3     | -1.02381 | 0.000387 | 0.019303 | -4.866   | Down | "Homo sapiens aldo-keto reductase family 1, member C3 (3-alpha hydroxysteroid dehydrogenase, type II) (AKR1C3), mRNA."               |
| ILMN_1794844 | THRSP      | -0.91851 | 0.00039  | 0.019404 | -4.86105 | Down | "Homo sapiens thyroid hormone responsive (SPOT14 homolog, rat) (THRSP), mRNA."                                                       |
| ILMN_1814719 | RBP4       | -1.6217  | 0.000391 | 0.019411 | -4.86005 | Down | "Homo sapiens retinol binding protein 4, plasma (RBP4), mRNA."                                                                       |
| ILMN_1685275 | MCAM       | -1.59123 | 0.000397 | 0.019598 | -4.84988 | Down | "Homo sapiens melanoma cell adhesion molecule (MCAM), mRNA."                                                                         |
| ILMN_1792748 | CPS1       | -0.96717 | 0.000398 | 0.019598 | -4.8492  | Down | "Homo sapiens carbamoyl-phosphate synthetase 1, mitochondrial (CPS1), mRNA."                                                         |
| ILMN_1780799 | ENPP2      | -0.99926 | 0.0004   | 0.019665 | -4.84638 | Down | "Homo sapiens ectonucleotide pyrophosphatase/phosphodiesterase 2 (ENPP2), transcript variant 2, mRNA."                               |
| ILMN_1653719 | ITGBL1     | -0.94615 | 0.000401 | 0.019709 | -4.84385 | Down | "Homo sapiens integrin, beta-like 1 (with EGF-like repeat domains) (ITGBL1), mRNA."                                                  |
| ILMN_1781536 | FAH        | -1.0043  | 0.000407 | 0.019926 | -4.83558 | Down | "Homo sapiens fumarylacetoacetate hydrolase (fumarylacetoacetase) (FAH), mRNA."                                                      |
| ILMN_1659316 | HEPACAM    | -0.84999 | 0.000409 | 0.019986 | -4.83283 | Down | "Homo sapiens hepatocyte cell adhesion molecule (HEPACAM), mRNA."                                                                    |
| ILMN_1682147 | HOOK2      | -1.15742 | 0.000413 | 0.020108 | -4.82658 | Down | "Homo sapiens hook homolog 2 (Drosophila) (HOOK2), transcript variant 1, mRNA."                                                      |
| ILMN_1704446 | SLC6A10P   | -1.07365 | 0.000414 | 0.020108 | -4.82595 | Down | "Homo sapiens solute carrier family 6 (neurotransmitter transporter, creatine), member 10 (pseudogene) (SLC6A10P) on chromosome 16." |
| ILMN_1654112 | PARD6A     | -0.97484 | 0.000433 | 0.020802 | -4.79943 | Down | "Homo sapiens par-6 partitioning defective 6 homolog alpha (C. elegans) (PARD6A), transcript variant 2, mRNA."                       |
| ILMN_1672091 | HOXD4      | -0.73402 | 0.000436 | 0.020845 | -4.79582 | Down | "Homo sapiens homeobox D4 (HOXD4), mRNA."                                                                                            |
| ILMN_3301740 | LOC729887  | -0.967   | 0.000439 | 0.020956 | -4.79192 | Down | "PREDICTED: Homo sapiens misc_RNA (LOC729887), miscRNA."                                                                             |
| ILMN_2196328 | POSTN      | -0.89339 | 0.000446 | 0.021234 | -4.78143 | Down | "Homo sapiens periostin, osteoblast specific factor (POSTN), mRNA."                                                                  |
| ILMN_1772976 | BTNL9      | -1.36079 | 0.00045  | 0.02132  | -4.77715 | Down | "Homo sapiens butyrophilin-like 9 (BTNL9), mRNA."                                                                                    |
| ILMN_1690939 | ECGF1      | -1.31116 | 0.000452 | 0.021382 | -4.77386 | Down | "Homo sapiens endothelial cell growth factor 1 (platelet-derived) (ECGF1), mRNA."                                                    |
| ILMN_3220934 | NCRNA00152 | -1.02419 | 0.000453 | 0.021382 | -4.77266 | Down | "Homo sapiens non-protein coding RNA 152 (NCRNA00152), transcript variant 1, non-coding RNA."                                        |
| ILMN_1696846 | LOC541471  | -0.91292 | 0.000461 | 0.021657 | -4.76284 | Down | "PREDICTED: Homo sapiens hypothetical LOC541471 (LOC541471), misc RNA."                                                              |
| ILMN_1781636 | VWA1       | -0.98048 | 0.000475 | 0.022187 | -4.74522 | Down | "Homo sapiens von Willebrand factor A domain containing 1 (VWA1), transcript variant 1, mRNA."                                       |
| ILMN_1695947 | SCN4B      | -1.05576 | 0.000477 | 0.022247 | -4.74306 | Down | "Homo sapiens sodium channel, voltage-gated, type IV, beta (SCN4B), mRNA."                                                           |
| ILMN_1702226 | C21ORF34   | -0.7939  | 0.000479 | 0.022285 | -4.74042 | Down | "Homo sapiens chromosome 21 open reading frame 34 (C21orf34), transcript variant 1, mRNA."                                           |
| ILMN_2412192 | CFH        | -0.99092 | 0.000486 | 0.02254  | -4.73196 | Down | "Homo sapiens complement factor H (CFH), transcript variant 2, mRNA."                                                                |
| ILMN_1745256 | CXXC5      | -0.86372 | 0.000487 | 0.022557 | -4.73064 | Down | "Homo sapiens CXXC finger 5 (CXXC5), mRNA."                                                                                          |
| ILMN_1688886 | GPC5       | -0.80483 | 0.000494 | 0.022767 | -4.72212 | Down | "Homo sapiens glypican 5 (GPC5), mRNA."                                                                                              |

|              |           |          |          |          |          |      |                                                                                                                                                                           |
|--------------|-----------|----------|----------|----------|----------|------|---------------------------------------------------------------------------------------------------------------------------------------------------------------------------|
| ILMN_2317580 | SHANK3    | -0.83001 | 0.000499 | 0.022974 | -4.71627 | Down | "Homo sapiens SH3 and multiple ankyrin repeat domains 3 (SHANK3), mRNA."                                                                                                  |
| ILMN_1669747 | UNC13B    | -0.87052 | 0.000508 | 0.023183 | -4.70645 | Down | "Homo sapiens unc-13 homolog B (C. elegans) (UNC13B), mRNA."                                                                                                              |
| ILMN_2372698 | RGN       | -0.92834 | 0.00051  | 0.023229 | -4.70418 | Down | "Homo sapiens regucalcin (senescence marker protein-30) (RGN), transcript variant 2, mRNA."                                                                               |
| ILMN_1764826 | TFE3      | -0.75326 | 0.000512 | 0.023263 | -4.70165 | Down | "Homo sapiens transcription factor binding to IGHM enhancer 3 (TFE3), mRNA."                                                                                              |
| ILMN_1688625 | AIM1      | -0.73456 | 0.000513 | 0.023296 | -4.70002 | Down | "Homo sapiens absent in melanoma 1 (AIM1), mRNA."                                                                                                                         |
| ILMN_1767351 | AR        | -1.40849 | 0.000514 | 0.023296 | -4.69859 | Down | "Homo sapiens androgen receptor (AR), transcript variant 2, mRNA."                                                                                                        |
| ILMN_1779841 | PPP2R1B   | -1.16873 | 0.000526 | 0.023604 | -4.68538 | Down | "Homo sapiens protein phosphatase 2 (formerly 2A), regulatory subunit A, beta isoform (PPP2R1B), transcript variant 2, mRNA."                                             |
| ILMN_1678052 | C19ORF24  | -0.81649 | 0.000536 | 0.023891 | -4.67479 | Down | "Homo sapiens chromosome 19 open reading frame 24 (C19orf24), mRNA."                                                                                                      |
| ILMN_1805098 | PDE1B     | -1.12645 | 0.000543 | 0.02412  | -4.66673 | Down | "Homo sapiens phosphodiesterase 1B, calmodulin-dependent (PDE1B), mRNA."                                                                                                  |
| ILMN_1694075 | GADD45A   | -0.96312 | 0.000552 | 0.024326 | -4.65804 | Down | "Homo sapiens growth arrest and DNA-damage-inducible, alpha (GADD45A), mRNA."                                                                                             |
| ILMN_1773175 | LOC642399 | -1.18112 | 0.000555 | 0.024397 | -4.65468 | Down | "PREDICTED: Homo sapiens similar to CG5435-PA (LOC642399), mRNA."                                                                                                         |
| ILMN_1656560 | PARM1     | -0.87526 | 0.00057  | 0.024903 | -4.63851 | Down | "Homo sapiens prostate androgen-regulated mucin-like protein 1 (PARM1), mRNA."                                                                                            |
| ILMN_1729161 | NOTCH1    | -0.81087 | 0.000578 | 0.025158 | -4.63101 | Down | "Homo sapiens Notch homolog 1, translocation-associated (Drosophila) (NOTCH1), mRNA."                                                                                     |
| ILMN_2395652 | PTGFR     | -0.93025 | 0.000583 | 0.025264 | -4.62591 | Down | "Homo sapiens prostaglandin F receptor (FP) (PTGFR), transcript variant 1, mRNA."                                                                                         |
| ILMN_1807503 | CPA2      | -0.73414 | 0.000587 | 0.025405 | -4.62161 | Down | "Homo sapiens carboxypeptidase A2 (pancreatic) (CPA2), mRNA."                                                                                                             |
| ILMN_1687757 | AKR1C4    | -0.89335 | 0.000601 | 0.025746 | -4.60863 | Down | "Homo sapiens aldo-keto reductase family 1, member C4 (chlordecone reductase; 3-alpha hydroxysteroid dehydrogenase, type I; dihydrodiol dehydrogenase 4) (AKR1C4), mRNA." |
| ILMN_1729117 | COL5A2    | -0.82596 | 0.000604 | 0.025812 | -4.60558 | Down | "Homo sapiens collagen, type V, alpha 2 (COL5A2), mRNA."                                                                                                                  |
| ILMN_1675797 | EPDR1     | -0.75347 | 0.000604 | 0.025812 | -4.60506 | Down | "Homo sapiens ependymin related protein 1 (zebrafish) (EPDR1), mRNA."                                                                                                     |
| ILMN_1772588 | C6ORF97   | -1.10473 | 0.000613 | 0.02604  | -4.59684 | Down | "Homo sapiens chromosome 6 open reading frame 97 (C6orf97), mRNA."                                                                                                        |
| ILMN_1677963 | TMCC1     | -0.88984 | 0.000623 | 0.026324 | -4.58778 | Down | "Homo sapiens transmembrane and coiled-coil domain family 1 (TMCC1), transcript variant 1, mRNA."                                                                         |
| ILMN_1734184 | P76       | -1.0586  | 0.000626 | 0.026415 | -4.58435 | Down | "Homo sapiens mannose-6-phosphate protein p76 (P76), mRNA."                                                                                                               |
| ILMN_2049672 | TMEM16C   | -1.72406 | 0.000629 | 0.02642  | -4.58227 | Down | "Homo sapiens transmembrane protein 16C (TMEM16C), mRNA."                                                                                                                 |
| ILMN_1696699 | FAM184A   | -0.98344 | 0.000631 | 0.026429 | -4.58047 | Down | "Homo sapiens family with sequence similarity 184, member A (FAM184A), transcript variant 1, mRNA."                                                                       |
| ILMN_2126038 | STMN2     | -3.16202 | 0.000633 | 0.026488 | -4.57824 | Down | "Homo sapiens stathmin-like 2 (STMN2), mRNA."                                                                                                                             |
| ILMN_1690839 | PPAPDC3   | -0.72872 | 0.000641 | 0.026688 | -4.57136 | Down | "Homo sapiens phosphatidic acid phosphatase type 2 domain containing 3 (PPAPDC3), mRNA."                                                                                  |
| ILMN_1716639 | LOC646625 | -2.15807 | 0.000646 | 0.026846 | -4.56692 | Down | "PREDICTED: Homo sapiens hypothetical LOC646625 (LOC646625), mRNA."                                                                                                       |
| ILMN_1778360 | PYGB      | -0.86849 | 0.000651 | 0.027015 | -4.56229 | Down | "Homo sapiens phosphorylase, glycogen; brain (PYGB), mRNA."                                                                                                               |
| ILMN_2352097 | GPR56     | -0.81665 | 0.000669 | 0.027489 | -4.54624 | Down | "Homo sapiens G protein-coupled receptor 56 (GPR56), transcript variant 2, mRNA."                                                                                         |
| ILMN_1734929 | BBOX1     | -1.58322 | 0.000671 | 0.027529 | -4.54489 | Down | "Homo sapiens butyrobetaine (gamma), 2-oxoglutarate dioxygenase (gamma-butyrobetaine hydroxylase) 1 (BBOX1), mRNA."                                                       |
| ILMN_1750674 | SDSL      | -0.77006 | 0.000677 | 0.027678 | -4.53929 | Down | "Homo sapiens serine dehydratase-like (SDSL), mRNA."                                                                                                                      |
| ILMN_1789535 | DHDDS     | -1.18872 | 0.000687 | 0.027948 | -4.53085 | Down | "Homo sapiens dehydrodolichyl diphosphate synthase (DHDDS), transcript variant 2, mRNA."                                                                                  |
| ILMN_2352953 | CPM       | -0.79132 | 0.0007   | 0.028299 | -4.5201  | Down | "Homo sapiens carboxypeptidase M (CPM), transcript variant 2, mRNA."                                                                                                      |
| ILMN_1738589 | MGLL      | -0.77679 | 0.000713 | 0.028751 | -4.51002 | Down | "Homo sapiens monoglyceride lipase (MGLL), transcript variant 1, mRNA."                                                                                                   |

|              |           |          |          |          |          |      |                                                                                                                                                                                                 |
|--------------|-----------|----------|----------|----------|----------|------|-------------------------------------------------------------------------------------------------------------------------------------------------------------------------------------------------|
| ILMN_1704376 | GLDN      | -1.57831 | 0.000718 | 0.028861 | -4.50533 | Down | "Homo sapiens gliomedin (GLDN), mRNA."                                                                                                                                                          |
| ILMN_1667948 | SPATA18   | -0.9041  | 0.00072  | 0.028861 | -4.50394 | Down | "Homo sapiens spermatogenesis associated 18 homolog (rat) (SPATA18), mRNA."                                                                                                                     |
| ILMN_2405185 | AOC2      | -0.85731 | 0.000723 | 0.028923 | -4.50172 | Down | "Homo sapiens amine oxidase, copper containing 2 (retina-specific) (AOC2), transcript variant 1, mRNA."                                                                                         |
| ILMN_1651285 | BCL6B     | -1.09804 | 0.000729 | 0.029132 | -4.49661 | Down | "Homo sapiens B-cell CLL/lymphoma 6, member B (zinc finger protein) (BCL6B), mRNA."                                                                                                             |
| ILMN_1802894 | VKORC1L1  | -1.09118 | 0.000733 | 0.029191 | -4.49401 | Down | "Homo sapiens vitamin K epoxide reductase complex, subunit 1-like 1 (VKORC1L1), mRNA."                                                                                                          |
| ILMN_2277419 | SLC38A10  | -0.76426 | 0.000735 | 0.029191 | -4.49259 | Down | "Homo sapiens solute carrier family 38, member 10 (SLC38A10), transcript variant 1, mRNA."                                                                                                      |
| ILMN_1688103 | CTNNBIP1  | -0.89725 | 0.000735 | 0.029191 | -4.49257 | Down | "Homo sapiens catenin, beta interacting protein 1 (CTNNBIP1), transcript variant 1, mRNA."                                                                                                      |
| ILMN_2396148 | HIP1R     | -1.1213  | 0.000735 | 0.029191 | -4.49257 | Down | "Homo sapiens huntingtin interacting protein 1 related (HIP1R), mRNA."                                                                                                                          |
| ILMN_1655563 | KIAA0427  | -0.84024 | 0.000738 | 0.029246 | -4.49014 | Down | "Homo sapiens KIAA0427 (KIAA0427), mRNA."<br>"Homo sapiens aldehyde dehydrogenase 4 family, member A1 (ALDH4A1), nuclear gene encoding mitochondrial protein, transcript variant P5CDhL, mRNA." |
| ILMN_1696099 | ALDH4A1   | -1.21972 | 0.000745 | 0.029444 | -4.48424 | Down | "Homo sapiens thrombospondin, type I, domain containing 1 (THSD1), transcript variant 1, mRNA."                                                                                                 |
| ILMN_1733157 | THSD1     | -0.75584 | 0.000751 | 0.029547 | -4.48024 | Down | "Homo sapiens dehydrodolichyl diphosphate synthase (DHDDS), transcript variant 1, mRNA."                                                                                                        |
| ILMN_2405642 | DHDDS     | -1.17956 | 0.000755 | 0.029599 | -4.47695 | Down | "Homo sapiens RNA, U6 small nuclear 15 (RNU6-15), small nuclear RNA."                                                                                                                           |
| ILMN_3310351 | RNU6-15   | -1.29429 | 0.00077  | 0.030004 | -4.46585 | Down | "Homo sapiens fatty acid desaturase 3 (FADS3), mRNA."                                                                                                                                           |
| ILMN_2098643 | FADS3     | -1.38206 | 0.000771 | 0.030016 | -4.4649  | Down | "Homo sapiens Notch homolog 4 (Drosophila) (NOTCH4), mRNA."                                                                                                                                     |
| ILMN_1711157 | NOTCH4    | -0.86421 | 0.000775 | 0.030125 | -4.46174 | Down | "Homo sapiens regucalcin (senescence marker protein-30) (RGN), transcript variant 2, mRNA."                                                                                                     |
| ILMN_1707592 | RGN       | -0.8979  | 0.000779 | 0.030182 | -4.45916 | Down | "Homo sapiens jagged 2 (JAG2), transcript variant 2, mRNA."                                                                                                                                     |
| ILMN_2399523 | JAG2      | -0.88448 | 0.000784 | 0.030357 | -4.45539 | Down | "PREDICTED: Homo sapiens similar to CDC14 homolog B isoform 2 (LOC641983), mRNA."                                                                                                               |
| ILMN_1805251 | LOC641983 | -1.00699 | 0.000799 | 0.030755 | -4.4442  | Down | "Homo sapiens G protein-coupled receptor 109A (GPR109A), mRNA."                                                                                                                                 |
| ILMN_1750497 | GPR109A   | -1.45786 | 0.000803 | 0.03085  | -4.44195 | Down | "Homo sapiens elongation of very long chain fatty acids (FEN1/Elo2, SUR4/Elo3, yeast)-like 3 (ELOVL3), mRNA."                                                                                   |
| ILMN_1692123 | ELOVL3    | -0.82441 | 0.000811 | 0.030997 | -4.43614 | Down | "PREDICTED: Homo sapiens hypothetical LOC388214 (LOC388214), mRNA"                                                                                                                              |
| ILMN_1859127 | HS.190748 | -1.11391 | 0.000811 | 0.030997 | -4.43566 | Down | "Homo sapiens ubiquitin carboxyl-terminal esterase L1 (ubiquitin thiolesterase) (UCHL1), mRNA."                                                                                                 |
| ILMN_1757387 | UCHL1     | -1.11173 | 0.000822 | 0.031305 | -4.42842 | Down | "Homo sapiens chromosome 11 open reading frame 70 (C11orf70), mRNA."                                                                                                                            |
| ILMN_2168520 | C11ORF70  | -0.75458 | 0.000822 | 0.031305 | -4.42806 | Down | Homo sapiens mRNA; cDNA DKFZp686N1644 (from clone DKFZp686N1644)                                                                                                                                |
| ILMN_1861270 | HS.374023 | -0.78611 | 0.000834 | 0.031623 | -4.42026 | Down | "Homo sapiens sorting nexin family member 21 (SNX21), transcript variant 3, mRNA."                                                                                                              |
| ILMN_1768282 | SNX21     | -0.9381  | 0.000839 | 0.031725 | -4.41635 | Down | "Homo sapiens complement factor H (CFH), transcript variant 2, mRNA."                                                                                                                           |
| ILMN_1657803 | CFH       | -0.98162 | 0.000842 | 0.031812 | -4.41432 | Down | "Homo sapiens transducin-like enhancer of split 2 (E(sp1) homolog, Drosophila) (TLE2), mRNA."                                                                                                   |
| ILMN_1814917 | TLE2      | -0.84144 | 0.00085  | 0.032    | -4.40914 | Down | "Homo sapiens calcium and integrin binding family member 2 (CIB2), mRNA."                                                                                                                       |
| ILMN_1714489 | CIB2      | -0.92858 | 0.000856 | 0.032087 | -4.4052  | Down | "Homo sapiens NAD(P)H dehydrogenase, quinone 1 (NQO1), transcript variant 1, mRNA."                                                                                                             |
| ILMN_2354953 | NQO1      | -1.01064 | 0.000872 | 0.032409 | -4.3947  | Down | "Homo sapiens microtubule-associated protein tau (MAPT), transcript variant 4, mRNA."                                                                                                           |
| ILMN_2310814 | MAPT      | -1.59319 | 0.000891 | 0.032774 | -4.3821  | Down | "PREDICTED: Homo sapiens hypothetical protein LOC646064 (LOC646064), mRNA."                                                                                                                     |
| ILMN_1691574 | LOC646064 | -0.83773 | 0.000897 | 0.032863 | -4.37878 | Down | "Homo sapiens follistatin-like 3 (secreted glycoprotein) (FSTL3), mRNA."                                                                                                                        |
| ILMN_1730670 | FSTL3     | -1.15379 | 0.000899 | 0.032936 | -4.37708 | Down | "Homo sapiens interferon regulatory factor 8 (IRF8), mRNA."                                                                                                                                     |
| ILMN_1666594 | IRF8      | -0.98248 | 0.000906 | 0.033119 | -4.3726  | Down | "DA104205 BRACE3 Homo sapiens cDNA clone BRACE3017487 5, mRNA sequence"                                                                                                                         |
| ILMN_1883780 | HS.580330 | -0.75185 | 0.00092  | 0.033332 | -4.36415 | Down |                                                                                                                                                                                                 |

|              |              |          |          |          |          |      |                                                                                                                                                      |
|--------------|--------------|----------|----------|----------|----------|------|------------------------------------------------------------------------------------------------------------------------------------------------------|
| ILMN_1772537 | SCTR         | -0.89597 | 0.000936 | 0.033621 | -4.35436 | Down | "Homo sapiens secretin receptor (SCTR), mRNA."                                                                                                       |
| ILMN_1810910 | CFH          | -1.01888 | 0.000949 | 0.033847 | -4.34656 | Down | "Homo sapiens complement factor H (CFH), transcript variant 2, mRNA."                                                                                |
| ILMN_1705629 | STEAP1       | -0.7441  | 0.000949 | 0.033847 | -4.34635 | Down | "PREDICTED: Homo sapiens six transmembrane epithelial antigen of the prostate 1 (STEAP1), mRNA."                                                     |
| ILMN_3204908 | LOC100131447 | -0.95267 | 0.00095  | 0.033847 | -4.34588 | Down | "PREDICTED: Homo sapiens misc RNA (LOC100131447), miscRNA."                                                                                          |
| ILMN_1659649 | SGCG         | -1.02947 | 0.000951 | 0.033847 | -4.34536 | Down | "Homo sapiens sarcoglycan, gamma (35kDa dystrophin-associated glycoprotein) (SGCG), mRNA."                                                           |
| ILMN_1768556 | CASKIN2      | -0.72873 | 0.000956 | 0.033902 | -4.34226 | Down | "Homo sapiens CASK interacting protein 2 (CASKIN2), mRNA."                                                                                           |
| ILMN_1676036 | LOC649679    | -0.84654 | 0.000959 | 0.03394  | -4.34051 | Down | "PREDICTED: Homo sapiens similar to Tubulin beta-4q chain, transcript variant 2 (LOC649679), mRNA."                                                  |
| ILMN_1724540 | CART1        | -0.89329 | 0.00096  | 0.03394  | -4.34013 | Down | "Homo sapiens cartilage paired-class homeoprotein 1 (CART1), mRNA."                                                                                  |
| ILMN_2383383 | PIR          | -0.82948 | 0.000967 | 0.034097 | -4.3355  | Down | "Homo sapiens pirin (iron-binding nuclear protein) (PIR), transcript variant 2, mRNA."                                                               |
| ILMN_1738116 | TMEM119      | -0.9688  | 0.000968 | 0.034097 | -4.3354  | Down | "Homo sapiens transmembrane protein 119 (TMEM119), mRNA."                                                                                            |
| ILMN_2386444 | ANGPTL4      | -1.42262 | 0.000984 | 0.034425 | -4.32618 | Down | "Homo sapiens angiopoietin-like 4 (ANGPTL4), transcript variant 3, mRNA."                                                                            |
| ILMN_1740407 | CHSY3        | -0.86011 | 0.000989 | 0.034549 | -4.32288 | Down | "Homo sapiens chondroitin sulfate synthase 3 (CHSY3), mRNA."                                                                                         |
| ILMN_1721968 | NOVA1        | -0.93741 | 0.000998 | 0.034711 | -4.31813 | Down | "Homo sapiens neuro-oncological ventral antigen 1 (NOVA1), transcript variant 1, mRNA."                                                              |
| ILMN_1813685 | RAB7L1       | -0.73809 | 0.001012 | 0.035005 | -4.31003 | Down | "Homo sapiens RAB7, member RAS oncogene family-like 1 (RAB7L1), mRNA."                                                                               |
| ILMN_1761425 | OLFML2A      | -0.89208 | 0.00102  | 0.035204 | -4.30559 | Down | "Homo sapiens olfactomedin-like 2A (OLFML2A), mRNA."                                                                                                 |
| ILMN_2244841 | ALDH4A1      | -1.26122 | 0.001024 | 0.035287 | -4.30318 | Down | "Homo sapiens aldehyde dehydrogenase 4 family, member A1 (ALDH4A1), nuclear gene encoding mitochondrial protein, transcript variant P5CDhL, mRNA."   |
| ILMN_1663032 | FNDC4        | -0.9097  | 0.001025 | 0.035287 | -4.30259 | Down | "Homo sapiens fibronectin type III domain containing 4 (FNDC4), mRNA."                                                                               |
| ILMN_1734445 | LOC91461     | -0.95298 | 0.001033 | 0.03547  | -4.29819 | Down | "Homo sapiens hypothetical protein BC007901 (LOC91461), mRNA."                                                                                       |
| ILMN_1765419 | GPLD1        | -1.30462 | 0.001043 | 0.035567 | -4.29279 | Down | "Homo sapiens glycosylphosphatidylinositol specific phospholipase D1 (GPLD1), transcript variant 1, mRNA."                                           |
| ILMN_1789702 | GBE1         | -0.82447 | 0.001049 | 0.035722 | -4.28993 | Down | "Homo sapiens glucan (1,4-alpha-), branching enzyme 1 (glycogen branching enzyme, Andersen disease, glycogen storage disease type IV) (GBE1), mRNA." |
| ILMN_1784602 | CDKN1A       | -1.17611 | 0.001053 | 0.035783 | -4.28775 | Down | "Homo sapiens cyclin-dependent kinase inhibitor 1A (p21, Cip1) (CDKN1A), transcript variant 1, mRNA."                                                |
| ILMN_1748881 | MRAS         | -1.05431 | 0.001059 | 0.035825 | -4.28441 | Down | "Homo sapiens muscle RAS oncogene homolog (MRAS), transcript variant 1, mRNA."                                                                       |
| ILMN_1851865 | LOC158376    | -0.7981  | 0.001062 | 0.035883 | -4.28293 | Down | "PREDICTED: Homo sapiens hypothetical protein LOC158376 (LOC158376), mRNA."                                                                          |
| ILMN_1671489 | PC           | -1.42882 | 0.001069 | 0.035985 | -4.27884 | Down | "Homo sapiens pyruvate carboxylase (PC), nuclear gene encoding mitochondrial protein, transcript variant A, mRNA."                                   |
| ILMN_2091846 | FTHL2        | -0.91046 | 0.001074 | 0.036033 | -4.27629 | Down | "Homo sapiens ferritin, heavy polypeptide-like 2 (FTHL2) on chromosome 1."                                                                           |
| ILMN_1796755 | ITGB5        | -0.85966 | 0.001076 | 0.036033 | -4.27538 | Down | "Homo sapiens integrin, beta 5 (ITGB5), mRNA. XM_944688 XM_944693"                                                                                   |
| ILMN_1750100 | TUBB4Q       | -1.0731  | 0.001077 | 0.036033 | -4.27455 | Down | "Homo sapiens tubulin, beta polypeptide 4, member Q (TUBB4Q), mRNA."                                                                                 |
| ILMN_2358626 | ADK          | -0.8126  | 0.001102 | 0.036531 | -4.26163 | Down | "Homo sapiens adenosine kinase (ADK), transcript variant ADK-short, mRNA."                                                                           |
| ILMN_1860665 | HS.582097    | -1.49446 | 0.001105 | 0.036581 | -4.26007 | Down | "RST41218 Athersys RAGE Library Homo sapiens cDNA, mRNA sequence"                                                                                    |
| ILMN_2410938 | SMOC1        | -0.8833  | 0.001111 | 0.036698 | -4.25733 | Down | "Homo sapiens SPARC related modular calcium binding 1 (SMOC1), transcript variant 1, mRNA."                                                          |
| ILMN_2402172 | SEPT4        | -0.78629 | 0.001112 | 0.036698 | -4.25669 | Down | "Homo sapiens septin 4 (SEPT4), transcript variant 3, mRNA."                                                                                         |
| ILMN_2395451 | ASS1         | -0.86187 | 0.001114 | 0.036725 | -4.25588 | Down | "Homo sapiens argininosuccinate synthetase 1 (ASS1), transcript variant 2, mRNA."                                                                    |



|              |           |          |          |          |          |      |                                                                                                                                              |
|--------------|-----------|----------|----------|----------|----------|------|----------------------------------------------------------------------------------------------------------------------------------------------|
| ILMN_2102670 | GATA2     | -0.75875 | 0.001133 | 0.037116 | -4.24599 | Down | "Homo sapiens GATA binding protein 2 (GATA2), mRNA."                                                                                         |
| ILMN_1745806 | PEMT      | -1.43413 | 0.001149 | 0.037422 | -4.23817 | Down | "Homo sapiens phosphatidylethanolamine N-methyltransferase (PEMT), nuclear gene encoding mitochondrial protein, transcript variant 1, mRNA." |
| ILMN_1808777 | EHD2      | -0.91484 | 0.001153 | 0.037422 | -4.23652 | Down | "Homo sapiens EH-domain containing 2 (EHD2), mRNA."                                                                                          |
| ILMN_1770663 | KRT24     | -1.10509 | 0.001154 | 0.037436 | -4.23563 | Down | "Homo sapiens keratin 24 (KRT24), mRNA."                                                                                                     |
| ILMN_1812559 | SLC7A6    | -0.7428  | 0.001156 | 0.037436 | -4.23477 | Down | "Homo sapiens solute carrier family 7 (cationic amino acid transporter, y+ system), member 6 (SLC7A6), transcript variant 2, mRNA."          |
| ILMN_1846306 | HS.363526 | -1.03949 | 0.00116  | 0.037503 | -4.23277 | Down | Homo sapiens cDNA clone IMAGE:4837650                                                                                                        |
| ILMN_2312194 | CYB5A     | -0.85969 | 0.001168 | 0.03771  | -4.22884 | Down | "Homo sapiens cytochrome b5 type A (microsomal) (CYB5A), transcript variant 2, mRNA."                                                        |
| ILMN_1789648 | SCGN      | -0.99906 | 0.001198 | 0.038365 | -4.21473 | Down | "Homo sapiens secretagoin, EF-hand calcium binding protein (SCGN), mRNA."                                                                    |
| ILMN_1691483 | CLU       | -0.91345 | 0.001203 | 0.038365 | -4.21251 | Down | "Homo sapiens clusterin (CLU), transcript variant 2, mRNA."                                                                                  |
| ILMN_1769556 | C5ORF23   | -1.79809 | 0.001203 | 0.038365 | -4.21234 | Down | "Homo sapiens chromosome 5 open reading frame 23 (C5orf23), mRNA."                                                                           |
| ILMN_2369403 | PALM2     | -0.89108 | 0.001208 | 0.038502 | -4.20995 | Down | "Homo sapiens paralemmin 2 (PALM2), transcript variant 2, mRNA."                                                                             |
| ILMN_1752294 | PCDH9     | -1.2459  | 0.001223 | 0.038746 | -4.20299 | Down | "Homo sapiens protocadherin 9 (PCDH9), transcript variant 1, mRNA."                                                                          |
| ILMN_1696066 | CARS      | -0.80971 | 0.001228 | 0.038851 | -4.20073 | Down | "Homo sapiens cysteinyl-tRNA synthetase (CARS), transcript variant 4, mRNA."                                                                 |
| ILMN_1787843 | HSDL2     | -0.72982 | 0.001233 | 0.038953 | -4.19843 | Down | "Homo sapiens hydroxysteroid dehydrogenase like 2 (HSDL2), mRNA."                                                                            |
| ILMN_1673522 | MOCOS     | -0.85942 | 0.001237 | 0.038995 | -4.19676 | Down | "Homo sapiens molybdenum cofactor sulfurase (MOCOS), mRNA."                                                                                  |
| ILMN_1803094 | PDGFD     | -1.09821 | 0.001243 | 0.039123 | -4.19418 | Down | "Homo sapiens platelet derived growth factor D (PDGFD), transcript variant 2, mRNA."                                                         |
| ILMN_1671777 | FGF13     | -0.95577 | 0.001247 | 0.039251 | -4.19196 | Down | "Homo sapiens fibroblast growth factor 13 (FGF13), transcript variant 1A, mRNA."                                                             |
| ILMN_1714170 | SPSB1     | -0.76765 | 0.001252 | 0.039307 | -4.19005 | Down | "Homo sapiens sPLA/ryanodine receptor domain and SOCS box containing 1 (SPSB1), mRNA."                                                       |
| ILMN_1795963 | OKL38     | -0.90163 | 0.001254 | 0.039331 | -4.18895 | Down | "Homo sapiens pregnancy-induced growth inhibitor (OKL38), transcript variant 1, mRNA."                                                       |
| ILMN_1797201 | KRTAP10-2 | -1.2139  | 0.00126  | 0.039431 | -4.18642 | Down | "Homo sapiens keratin associated protein 10-2 (KRTAP10-2), mRNA."                                                                            |
| ILMN_1807169 | TINAGL1   | -0.82684 | 0.001273 | 0.039588 | -4.18062 | Down | "Homo sapiens tubulointerstitial nephritis antigen-like 1 (TINAGL1), mRNA."                                                                  |
| ILMN_1707077 | SORT1     | -1.14345 | 0.001274 | 0.039588 | -4.18029 | Down | "Homo sapiens sortilin 1 (SORT1), mRNA."                                                                                                     |
| ILMN_2111255 | VIT       | -1.25067 | 0.001275 | 0.039588 | -4.17975 | Down | "Homo sapiens vitrin (VIT), mRNA."                                                                                                           |
| ILMN_1743784 | SHMT1     | -0.86891 | 0.001287 | 0.039662 | -4.17464 | Down | "Homo sapiens serine hydroxymethyltransferase 1 (soluble) (SHMT1), transcript variant 1, mRNA."                                              |
| ILMN_2290118 | MEGF9     | -0.84591 | 0.001305 | 0.039923 | -4.16657 | Down | "Homo sapiens multiple EGF-like-domains 9 (MEGF9), mRNA."                                                                                    |
| ILMN_1812721 | LOC728014 | -0.8285  | 0.001306 | 0.039923 | -4.16624 | Down | "PREDICTED: Homo sapiens similar to huntingtin interacting protein 1 related (LOC728014), mRNA."                                             |
| ILMN_1662795 | CA2       | -0.76388 | 0.001312 | 0.040067 | -4.1635  | Down | "Homo sapiens carbonic anhydrase II (CA2), mRNA."                                                                                            |
| ILMN_1704656 | PPP2R1B   | -1.02024 | 0.001347 | 0.040661 | -4.14876 | Down | "Homo sapiens protein phosphatase 2 (formerly 2A), regulatory subunit A, beta isoform (PPP2R1B), transcript variant 2, mRNA."                |
| ILMN_1763837 | ANPEP     | -1.20973 | 0.001352 | 0.040668 | -4.14689 | Down | "Homo sapiens alanyl (membrane) aminopeptidase (aminopeptidase N, aminopeptidase M, microsomal aminopeptidase, CD13, p150) (ANPEP), mRNA."   |
| ILMN_1792495 | AHNAK     | -1.41447 | 0.001365 | 0.040905 | -4.14149 | Down | "Homo sapiens AHNAK nucleoprotein (AHNAK), transcript variant 1, mRNA."                                                                      |
| ILMN_1656638 | BHMT      | -0.85305 | 0.001371 | 0.041012 | -4.13897 | Down | "Homo sapiens betaine-homocysteine methyltransferase (BHMT), mRNA."                                                                          |
| ILMN_2413898 | MCM10     | -0.81846 | 0.001437 | 0.042265 | -4.11266 | Down | "Homo sapiens minichromosome maintenance complex component 10 (MCM10), transcript variant 2, mRNA."                                          |
| ILMN_1698533 | IDH3A     | -0.8011  | 0.001458 | 0.042631 | -4.10437 | Down | "Homo sapiens isocitrate dehydrogenase 3 (NAD+) alpha (IDH3A), nuclear gene encoding mitochondrial protein, mRNA."                           |

|              |           |          |          |          |          |      |                                                                                                                                                                       |
|--------------|-----------|----------|----------|----------|----------|------|-----------------------------------------------------------------------------------------------------------------------------------------------------------------------|
| ILMN_3244070 | ABCC6P2   | -0.72823 | 0.001461 | 0.042684 | -4.10333 | Down | "Homo sapiens ATP-binding cassette, sub-family C, member 6 pseudogene 2 (ABCC6P2), non-coding RNA."                                                                   |
| ILMN_1768598 | LAIR1     | -0.74324 | 0.001468 | 0.042795 | -4.10085 | Down | "Homo sapiens leukocyte-associated immunoglobulin-like receptor 1 (LAIR1), transcript variant b, mRNA."                                                               |
| ILMN_2170080 | CIDECP    | -1.02061 | 0.001477 | 0.042996 | -4.0972  | Down | "Homo sapiens cell death-inducing DFFA-like effector c pseudogene (CIDECP), non-coding RNA."                                                                          |
| ILMN_1776363 | ANK2      | -0.75797 | 0.00148  | 0.043033 | -4.0961  | Down | "Homo sapiens ankyrin 2, neuronal (ANK2), transcript variant 2, mRNA."                                                                                                |
| ILMN_1794017 | SERTAD1   | -0.75632 | 0.001489 | 0.043113 | -4.09294 | Down | "Homo sapiens SERTA domain containing 1 (SERTAD1), mRNA."                                                                                                             |
| ILMN_1701558 | MAP1A     | -1.40779 | 0.001495 | 0.043271 | -4.09056 | Down | "Homo sapiens microtubule-associated protein 1A (MAP1A), mRNA."                                                                                                       |
| ILMN_2112256 | TNFRSF4   | -1.08801 | 0.001497 | 0.043294 | -4.08991 | Down | "Homo sapiens tumor necrosis factor receptor superfamily, member 4 (TNFRSF4), mRNA."                                                                                  |
| ILMN_1662557 | MAP7D3    | -0.79584 | 0.001505 | 0.043452 | -4.08686 | Down | "Homo sapiens MAP7 domain containing 3 (MAP7D3), mRNA."                                                                                                               |
| ILMN_1651737 | LOC644689 | -1.18878 | 0.001522 | 0.043689 | -4.08059 | Down | "PREDICTED: Homo sapiens similar to N-acetylated-alpha-linked acidic dipeptidase II (NAALADase II) (LOC644689), mRNA."                                                |
| ILMN_1697820 | HINT2     | -0.73741 | 0.001524 | 0.043689 | -4.07975 | Down | "Homo sapiens histidine triad nucleotide binding protein 2 (HINT2), mRNA."                                                                                            |
| ILMN_1825249 | HS.453381 | -1.27632 | 0.001539 | 0.043921 | -4.07443 | Down | "in27e08.x1 Human Fetal Pancreas 1B Homo sapiens cDNA clone IMAGE: 3, mRNA sequence"                                                                                  |
| ILMN_1775235 | AFF3      | -0.85233 | 0.001542 | 0.043954 | -4.07334 | Down | "Homo sapiens AF4/FMR2 family, member 3 (AFF3), transcript variant 2, mRNA."                                                                                          |
| ILMN_1775268 | HECW2     | -0.97799 | 0.001551 | 0.044165 | -4.07    | Down | "Homo sapiens HECT, C2 and WW domain containing E3 ubiquitin protein ligase 2 (HECW2), mRNA."                                                                         |
| ILMN_1749907 | LOC441241 | -1.06899 | 0.001581 | 0.044687 | -4.05943 | Down | "PREDICTED: Homo sapiens chaperonin containing TCP1, subunit 6A (zeta 1)-like (LOC441241), mRNA."                                                                     |
| ILMN_2304495 | PPP1R1B   | -0.85043 | 0.001587 | 0.04474  | -4.05711 | Down | "Homo sapiens protein phosphatase 1, regulatory (inhibitor) subunit 1B (dopamine and cAMP regulated phosphoprotein, DARPP-32) (PPP1R1B), transcript variant 2, mRNA." |
| ILMN_1708778 | ASS1      | -0.90496 | 0.001608 | 0.045241 | -4.04991 | Down | "Homo sapiens argininosuccinate synthetase 1 (ASS1), transcript variant 1, mRNA."                                                                                     |
| ILMN_1773395 | RDH5      | -1.03496 | 0.001629 | 0.045605 | -4.04281 | Down | "Homo sapiens retinol dehydrogenase 5 (11-cis/9-cis) (RDH5), mRNA."                                                                                                   |
| ILMN_1803652 | C9ORF91   | -0.78129 | 0.001639 | 0.045769 | -4.03916 | Down | "Homo sapiens chromosome 9 open reading frame 91 (C9orf91), mRNA."                                                                                                    |
| ILMN_2052135 | LOH3CR2A  | -0.96644 | 0.001648 | 0.045955 | -4.03624 | Down | "Homo sapiens loss of heterozygosity, 3, chromosomal region 2, gene A (LOH3CR2A), mRNA."                                                                              |
| ILMN_1739423 | RN7SK     | -4.66483 | 0.001664 | 0.046224 | -4.03071 | Down | "Homo sapiens RNA, 7SK small nuclear (RN7SK), non-coding RNA."                                                                                                        |
| ILMN_1754538 | C10ORF58  | -0.7354  | 0.00167  | 0.046262 | -4.02901 | Down | "Homo sapiens chromosome 10 open reading frame 58 (C10orf58), transcript variant 1, mRNA."                                                                            |
| ILMN_1707727 | ANGPTL4   | -1.32658 | 0.001702 | 0.046916 | -4.01842 | Down | "Homo sapiens angiopoietin-like 4 (ANGPTL4), transcript variant 1, mRNA."                                                                                             |
| ILMN_1723971 | SLC29A1   | -0.95111 | 0.001734 | 0.047458 | -4.00808 | Down | "Homo sapiens solute carrier family 29 (nucleoside transporters), member 1 (SLC29A1), nuclear gene encoding mitochondrial protein, transcript variant 4, mRNA."       |
| ILMN_2141118 | C15ORF59  | -0.77492 | 0.00175  | 0.047704 | -4.00284 | Down | "Homo sapiens chromosome 15 open reading frame 59 (C15orf59), mRNA."                                                                                                  |
| ILMN_1795838 | C4ORF19   | -1.14745 | 0.001758 | 0.04776  | -4.00032 | Down | "Homo sapiens chromosome 4 open reading frame 19 (C4orf19), mRNA."                                                                                                    |
| ILMN_1690682 | B3GALT4   | -0.82005 | 0.001761 | 0.047814 | -3.99932 | Down | "Homo sapiens UDP-Gal:betaGlcNAc beta 1,3-galactosyltransferase, polypeptide 4 (B3GALT4), mRNA."                                                                      |
| ILMN_1767135 | SOS1      | -1.13327 | 0.001768 | 0.047884 | -3.99723 | Down | "Homo sapiens son of sevenless homolog 1 (Drosophila) (SOS1), mRNA."                                                                                                  |
| ILMN_1807244 | STGC3     | -0.78053 | 0.001788 | 0.048243 | -3.99087 | Down | "PREDICTED: Homo sapiens hypothetical STGC3 (STGC3), misc RNA."                                                                                                       |
| ILMN_1809947 | TMEM155   | -0.75043 | 0.001803 | 0.048311 | -3.98638 | Down | "Homo sapiens transmembrane protein 155 (TMEM155), mRNA."                                                                                                             |
| ILMN_2391150 | FILIP1L   | -0.93088 | 0.001817 | 0.048433 | -3.9821  | Down | "Homo sapiens filamin A interacting protein 1-like (FILIP1L), transcript variant 3, mRNA."                                                                            |
| ILMN_1656378 | NMT2      | -0.83905 | 0.001821 | 0.048494 | -3.98076 | Down | "Homo sapiens N-myristoyltransferase 2 (NMT2), mRNA."                                                                                                                 |
| ILMN_1705743 | FLJ10357  | -0.75163 | 0.001835 | 0.048673 | -3.97657 | Down | "Homo sapiens hypothetical protein FLJ10357 (FLJ10357), mRNA."                                                                                                        |

|              |         |          |          |          |          |      |                                                                                                                                     |
|--------------|---------|----------|----------|----------|----------|------|-------------------------------------------------------------------------------------------------------------------------------------|
| ILMN_1804207 | MRPL4   | -1.00009 | 0.001856 | 0.049089 | -3.97026 | Down | "Homo sapiens mitochondrial ribosomal protein L4 (MRPL4), nuclear gene encoding mitochondrial protein, transcript variant 1, mRNA." |
| ILMN_1730906 | FILIP1L | -0.79699 | 0.001894 | 0.049692 | -3.95908 | Down | "Homo sapiens filamin A interacting protein 1-like (FILIP1L), transcript variant 1, mRNA."                                          |
| ILMN_1779597 | CIDEC   | -0.87612 | 0.001907 | 0.049885 | -3.95518 | Down | "Homo sapiens cell death-inducing DFFA-like effector c (CIDEC), mRNA."                                                              |

**Table S2** The enriched pathway terms of the up-regulated differentially expressed genes

| Pathway ID               | Pathway Name                                             | P-value     | Adjusted P-value | Z-score      | Combined Score | Gene Count | Genes                                                  |
|--------------------------|----------------------------------------------------------|-------------|------------------|--------------|----------------|------------|--------------------------------------------------------|
| <b>KEGG</b>              |                                                          |             |                  |              |                |            |                                                        |
| hsa04610                 | Complement and coagulation cascades                      | 2.33393E-06 | 0.000373429      | -1.824138353 | 23.65534726    | 10         | C3,PROCR,VTN,C7,C1R,CFI,PLAT,C4B PB,CFB,               |
| hsa04514                 | Cell adhesion molecules (CAMs)                           | 0.001540375 | 0.123230014      | -1.701720853 | 11.01988355    | 09         | NTNG1,CLDN11,CNTNAP2,CDH3,CDH2,CLDN15,SDC4,NRXN2,CLDN1 |
| hsa05150                 | Staphylococcus aureus infection                          | 0.004071977 | 0.217172094      | -1.749095362 | 9.626367946    | 05         | C3,C1R,CFI,CFB,C2                                      |
| hsa05133                 | Pertussis                                                | 0.01377431  | 0.459483075      | -1.640674923 | 7.030210025    | 05         | C3,CXCL6,C1R,C4B PB,C2                                 |
| hsa04340                 | Hedgehog signaling pathway                               | 0.014602744 | 0.459483075      | -1.636676372 | 6.91748767     | 04         | WNT2B,WNT5A,GA S1,LRP2                                 |
| hsa04550                 | Signaling pathways regulating pluripotency of stem cells | 0.018477951 | 0.459483075      | -1.704080823 | 6.801288352    | 07         | MEIS1,WNT2B,FZD7,WNT5A,AXIN2,ISL1,FGFR3                |
| hsa05217                 | Basal cell carcinoma                                     | 0.020102385 | 0.459483075      | -1.654853579 | 6.46537531     | 04         | WNT2B,FZD7,WNT5A,AXIN2                                 |
| hsa04390                 | Hippo signaling pathway                                  | 0.026493449 | 0.494590892      | -1.568092351 | 5.693520346    | 07         | DLG2,WNT2B,FZD7,WWC1,WNT5A,AXIN2,PRKCZ                 |
| hsa05205                 | Proteoglycans in cancer                                  | 0.039599395 | 0.494590892      | -1.728622226 | 5.581619934    | 08         | VTN,WNT2B,SDC4,ERBB3,FZD7,WNT5A,HPSE, EZR              |
| hsa00350                 | Tyrosine metabolism                                      | 0.028051356 | 0.494590892      | -1.479412463 | 5.287003392    | 03         | ALDH1A3,ADH1C, AOX1                                    |
| <b>WikiPathways 2016</b> |                                                          |             |                  |              |                |            |                                                        |
| WP545                    | Complement Activation                                    | 4.74484E-05 | 0.00489392       | -2.040134457 | 20.3113088     | 05         |                                                        |
